# Supplementary material for: Unprecedented nor-seco-polycyclic polyprenylated acylphloroglucinols counteract myocardial cell injury via activation of the Akt/mTOR signaling pathway
Source: Royal Society of Chemistry journal article supplement (doi:10.1039/d4qo01010h), 2024-01-01
Supplement: d4qo01010h1.pdf [file d4qo01010h1.pdf]

## Supporting Information

### Unprecedented *nor-seco*-polycyclic polyprenylated acylphloroglucinols counteract myocardial cell injury *via* activation of the Akt/mTOR signaling pathway

Jiangchun Wei,<sup>a,b</sup> Pingping Fan,<sup>b</sup> Xingpiao Jin,<sup>b</sup> Xinping Li,<sup>a</sup> Zhiyue Li,<sup>a</sup> Xuanluan Chen,<sup>a</sup>  
Hanxiao Zeng,<sup>b</sup> Zhengzhi Wu,<sup>\*,a,d</sup> Yonghui Zhang,<sup>\*,b</sup> and Zhengxi Hu<sup>\*,b,c</sup>

<sup>a</sup>The First Affiliated Hospital of Shenzhen University, Shenzhen Second People's Hospital, Shenzhen 518035, China

<sup>b</sup>Hubei Key Laboratory of Natural Medicinal Chemistry and Resource Evaluation, School of Pharmacy, Tongji Medical College,  
Huazhong University of Science and Technology, Wuhan 430030, China

<sup>c</sup>Hubei Shizhen Laboratory, Wuhan 430061, China

<sup>d</sup>Wu Zhengzhi Academician Workstation, Ningbo College of Health Sciences, Ningbo 315800, China

\*Corresponding author Tel.: (86) 27-83692892

E-mail: hzx616@126.com (Z.H.), zhangyh@mails.tjmu.edu.cn (Y.Z.), and szwzz001@163.com (Z.W.).

## Contents

|                                                                                                                                                                        |    |
|------------------------------------------------------------------------------------------------------------------------------------------------------------------------|----|
| <b>Experimental section</b> .....                                                                                                                                      | 4  |
| General experimental procedures .....                                                                                                                                  | 4  |
| Plant material.....                                                                                                                                                    | 4  |
| Exaction and isolation .....                                                                                                                                           | 4  |
| Physical data of <b>1–5</b> .....                                                                                                                                      | 5  |
| Single-crystal X-ray diffraction analysis.....                                                                                                                         | 5  |
| Cytotoxicity assay.....                                                                                                                                                | 5  |
| Assay for testing the protective effects against myocardial cell injury induced by H <sub>2</sub> O <sub>2</sub> .....                                                 | 6  |
| Western blotting .....                                                                                                                                                 | 6  |
| Prediction of potential targets .....                                                                                                                                  | 6  |
| Molecular docking .....                                                                                                                                                | 6  |
| NMR calculation details for <b>3</b> and <b>4</b> .....                                                                                                                | 7  |
| ECD calculation details for <b>2</b> .....                                                                                                                             | 8  |
| <b>Table S1.</b> Top-ten ranking human protein hits of <b>1</b> and docking score .....                                                                                | 9  |
| <b>Figure S1.</b> Comparison of the NMR spectroscopic data between <b>1</b> and <b>2</b> and between <b>3</b> and <b>4</b> . .                                         | 10 |
| <b>Figure S2.</b> <i>R</i> <sup>2</sup> analysis of <sup>13</sup> C NMR chemical shifts of <b>3</b> and <b>4</b> based on the calculated and experimental values. .... | 10 |
| <b>Figure S3.</b> 2D and 3D ligand interactions of <b>1</b> with 4j6t-mTOR and 6hhi-AKT. ....                                                                          | 11 |
| <b>Figure S4.</b> 2D ligand interactions of <b>1</b> with top-ten ranking human protein hits. ....                                                                     | 12 |
| <b>Figure S5.</b> The raw images for all Western blot. ....                                                                                                            | 13 |
| <b>Figure S6.</b> <sup>1</sup> H NMR spectrum of compound <b>1</b> (recorded in chloroform- <i>d</i> ).....                                                            | 14 |
| <b>Figure S7.</b> <sup>13</sup> C NMR spectrum of compound <b>1</b> (recorded in chloroform- <i>d</i> ) .....                                                          | 14 |
| <b>Figure S8.</b> DEPT spectrum of compound <b>1</b> (recorded in chloroform- <i>d</i> ).....                                                                          | 15 |
| <b>Figure S9.</b> HSQC spectrum of compound <b>1</b> (recorded in chloroform- <i>d</i> ).....                                                                          | 15 |
| <b>Figure S10.</b> HMBC spectrum of compound <b>1</b> (recorded in chloroform- <i>d</i> ) .....                                                                        | 16 |
| <b>Figure S11.</b> <sup>1</sup> H– <sup>1</sup> H COSY spectrum of compound <b>1</b> (recorded in chloroform- <i>d</i> ) .....                                         | 16 |
| <b>Figure S12.</b> ROESY spectrum of compound <b>1</b> (recorded in chloroform- <i>d</i> ) .....                                                                       | 17 |
| <b>Figure S13.</b> HRESIMS spectrum of compound <b>1</b> .....                                                                                                         | 17 |
| <b>Figure S14.</b> IR spectrum of compound <b>1</b> .....                                                                                                              | 18 |
| <b>Figure S15.</b> UV spectrum of compound <b>1</b> .....                                                                                                              | 18 |
| <b>Figure S16.</b> CD spectrum of <b>1</b> in methanol .....                                                                                                           | 19 |
| <b>Figure S17.</b> <sup>1</sup> H NMR spectrum of compound <b>2</b> (recorded in chloroform- <i>d</i> ).....                                                           | 19 |
| <b>Figure S18.</b> <sup>13</sup> C NMR spectrum of compound <b>2</b> (recorded in chloroform- <i>d</i> ).....                                                          | 19 |
| <b>Figure S19.</b> DEPT spectrum of compound <b>2</b> (recorded in chloroform- <i>d</i> ) .....                                                                        | 20 |
| <b>Figure S20.</b> HSQC spectrum of compound <b>2</b> (recorded in chloroform- <i>d</i> ) .....                                                                        | 21 |
| <b>Figure S21.</b> HMBC spectrum of compound <b>2</b> (recorded in chloroform- <i>d</i> ) .....                                                                        | 21 |
| <b>Figure S22.</b> <sup>1</sup> H– <sup>1</sup> H COSY spectrum of compound <b>2</b> (recorded in chloroform- <i>d</i> ) .....                                         | 22 |
| <b>Figure S23.</b> ROESY spectrum of compound <b>2</b> (recorded in chloroform- <i>d</i> ).....                                                                        | 22 |
| <b>Figure S24.</b> HRESIMS spectrum of compound <b>2</b> .....                                                                                                         | 23 |
| <b>Figure S25.</b> IR spectrum of compound <b>2</b> .....                                                                                                              | 23 |
| <b>Figure S26.</b> UV spectrum of compound <b>2</b> .....                                                                                                              | 24 |
| <b>Figure S27.</b> CD spectrum of <b>2</b> in methanol .....                                                                                                           | 24 |
| <b>Figure S28.</b> <sup>1</sup> H NMR spectrum of compound <b>3</b> (recorded in chloroform- <i>d</i> ) .....                                                          | 25 |

|                                                                                                                                                                         |    |
|-------------------------------------------------------------------------------------------------------------------------------------------------------------------------|----|
| <b>Figure S29.</b> $^{13}\text{C}$ NMR spectrum of compound <b>3</b> (recorded in chloroform- <i>d</i> ) .....                                                          | 25 |
| <b>Figure S30.</b> DEPT spectrum of compound <b>3</b> (recorded in chloroform- <i>d</i> ) .....                                                                         | 26 |
| <b>Figure S31.</b> HSQC spectrum of compound <b>3</b> (recorded in chloroform- <i>d</i> ).....                                                                          | 26 |
| <b>Figure S32.</b> HMBC spectrum of compound <b>3</b> (recorded in chloroform- <i>d</i> ) .....                                                                         | 27 |
| <b>Figure S33.</b> $^1\text{H}$ - $^1\text{H}$ COSY spectrum of compound <b>3</b> (recorded in chloroform- <i>d</i> ) .....                                             | 27 |
| <b>Figure S34.</b> ROESY spectrum of compound <b>3</b> (recorded in chloroform- <i>d</i> ) .....                                                                        | 28 |
| <b>Figure S35.</b> HRESIMS spectrum of compound <b>3</b> .....                                                                                                          | 28 |
| <b>Figure S36.</b> IR spectrum of compound <b>3</b> .....                                                                                                               | 29 |
| <b>Figure S37.</b> UV spectrum of compound <b>3</b> .....                                                                                                               | 29 |
| <b>Figure S38.</b> CD spectrum of <b>3</b> in methanol .....                                                                                                            | 30 |
| <b>Figure S39.</b> $^1\text{H}$ NMR spectrum of compound <b>4</b> (recorded in chloroform- <i>d</i> ) .....                                                             | 30 |
| <b>Figure S40.</b> $^{13}\text{C}$ NMR spectrum of compound <b>4</b> (recorded in chloroform- <i>d</i> ).....                                                           | 31 |
| <b>Figure S41.</b> DEPT spectrum of compound <b>4</b> (recorded in chloroform- <i>d</i> ).....                                                                          | 31 |
| <b>Figure S42.</b> HSQC spectrum of compound <b>4</b> (recorded in chloroform- <i>d</i> ).....                                                                          | 32 |
| <b>Figure S43.</b> HMBC spectrum of compound <b>4</b> (recorded in chloroform- <i>d</i> ).....                                                                          | 32 |
| <b>Figure S44.</b> $^1\text{H}$ - $^1\text{H}$ COSY spectrum of compound <b>4</b> (recorded in chloroform- <i>d</i> ) .....                                             | 33 |
| <b>Figure S45.</b> ROESY NMR spectrum of compound <b>4</b> (recorded in chloroform- <i>d</i> ).....                                                                     | 33 |
| <b>Figure S46.</b> HRESIMS spectrum of compound <b>4</b> .....                                                                                                          | 34 |
| <b>Figure S47.</b> IR spectrum of compound <b>4</b> .....                                                                                                               | 34 |
| <b>Figure S48.</b> UV spectrum of compound <b>4</b> .....                                                                                                               | 35 |
| <b>Figure S49.</b> CD spectrum of <b>4</b> in methanol .....                                                                                                            | 35 |
| <b>Figure S50.</b> $^1\text{H}$ NMR spectrum of compound <b>5</b> (recorded in chloroform- <i>d</i> ) .....                                                             | 36 |
| <b>Figure S54.</b> $^{13}\text{C}$ NMR spectrum of compound <b>5</b> (recorded in chloroform- <i>d</i> ) .....                                                          | 36 |
| <b>Figure S52.</b> DEPT spectrum of compound <b>5</b> (recorded in chloroform- <i>d</i> ).....                                                                          | 37 |
| <b>Figure S53.</b> HSQC spectrum of compound <b>5</b> (recorded in chloroform- <i>d</i> ).....                                                                          | 37 |
| <b>Figure S54.</b> HMBC spectrum of compound <b>5</b> (recorded in chloroform- <i>d</i> ) .....                                                                         | 38 |
| <b>Figure S55.</b> $^1\text{H}$ - $^1\text{H}$ COSY spectrum of compound <b>5</b> (recorded in chloroform- <i>d</i> ) .....                                             | 38 |
| <b>Figure S56.</b> ROESY spectrum of compound <b>5</b> (recorded in chloroform- <i>d</i> ) .....                                                                        | 39 |
| <b>Figure S57.</b> HRESIMS spectrum of compound <b>5</b> .....                                                                                                          | 39 |
| <b>Figure S58.</b> IR spectrum of compound <b>5</b> .....                                                                                                               | 40 |
| <b>Figure S59.</b> UV spectrum of compound <b>5</b> .....                                                                                                               | 40 |
| <b>Figure S60.</b> CD spectrum of <b>5</b> in methanol .....                                                                                                            | 41 |
| <b>Table S2.</b> Gibbs free energies <sup>a</sup> and equilibrium populations <sup>b</sup> of low-energy conformers of <b>3</b> .....                                   | 42 |
| <b>Table S3.</b> Cartesian coordinates for the low-energy reoptimized random research conformers of <b>3</b> at B3LYP-D3(BJ)/6-31G* level of theory in chloroform. .... | 43 |
| <b>Table S4.</b> Gibbs free energies <sup>a</sup> and equilibrium populations <sup>b</sup> of low-energy conformers of <b>4</b> .....                                   | 61 |
| <b>Table S5.</b> Cartesian coordinates for the low-energy reoptimized random research conformers of <b>4</b> at B3LYP-D3(BJ)/6-31G* level of theory in chloroform. .... | 62 |
| <b>Table S6.</b> Gibbs free energies <sup>a</sup> and equilibrium populations <sup>b</sup> of low-energy conformers of <b>2</b> .....                                   | 80 |
| <b>Table S7.</b> G Cartesian coordinates for the low-energy reoptimized random research conformers of <b>2</b> at B3LYP-D3(BJ)/6-31G* level of theory in methanol.....  | 81 |

## Experimental section

### General experimental procedures

Optical rotations and UV spectra were recorded on a PerkinElmer 341 polarimeter (PerkinElmer Inc., Fremont, California, USA) and a Lambda 35 instrument (PerkinElmer Inc., Fremont, California, USA), respectively. IR spectra were obtained using a Bruker Vertex 70 FT-IR spectrophotometer (Bruker, Karlsruhe, Germany). Experimental ECD data were collected on a JASCO J-810 spectrometer (JASCO, Tokyo, Japan). The NMR spectra were recorded on a Bruker AM-600 spectrometer with TMS as the internal standard. All chemical shifts ( $\delta$ ) were expressed in ppm relative to the solvent signal (chloroform-*d*:  $\delta_{\text{H}}$  7.26,  $\delta_{\text{C}}$  77.16). HRESIMS data were recorded in the positive-ion mode on a Bruker micrOTOF-Q II spectrometer (Bruker, Karlsruhe, Germany). Column chromatography (CC) was performed with silica gel (200–300 mesh, Qingdao Marine Chemical, Inc., Qingdao, China), Sephadex LH-20 (40–70  $\mu\text{m}$ , Amersham Pharmacia Biotech AB, Uppsala, Sweden), and octadecylsilyl (ODS, 50  $\mu\text{m}$ , YMC Co. Ltd., Japan). Preparative HPLC was performed on a Sanotac instrument China (Shanghai Sanotac Scientific Instruments Co., Ltd, Shang-Hai, China) with a UV detector and a YMC C18 column (250  $\times$  20 mm, 5  $\mu\text{m}$ , YMC, Kyoto, Japan). Semi-preparative HPLC separations were conducted on an Agilent 1100 liquid chromatograph with a reversed-phase (RP) C<sub>18</sub> column (5  $\mu\text{m}$ , 10  $\times$  250 mm, Welch Materials, Inc.). Thin-layer chromatography (TLC) was carried out with silica gel 60 F<sub>254</sub> (Yantai Chemical Industry Research Institute). Fractions were monitored by TLC, and spots were visualized by heating silica gel plates sprayed with 10% H<sub>2</sub>SO<sub>4</sub> in EtOH.

### Plant material

The aerial parts of *Hypericum monogynum* L. were collected from Shennongjia Forestry, Hubei Province, People's Republic of China, in September 30, 2022. The plant was identified by Professor Jingming Jia of Shenyang Pharmaceutical University. A voucher specimen (No. HB20220930) has been deposited in the herbarium of School of Pharmacy, Tongji Medical College, Huazhong University of Science and Technology.

### Exaction and isolation

The air-dried aerial parts of *H. monogynum* (20 kg) were percolated with 95% EtOH three times at room temperature. The combined EtOH extract was concentrated under vacuum (water-bath temperature for evaporation was maintained below 50 °C) to yield a residue (1320 g). Then, the resulting residue was suspended in H<sub>2</sub>O and extracted three times with petroleum ether to afford a crude extract.

The petroleum ether extract (310 g) was subjected to silica gel CC, eluted with petroleum ether/acetate extract (10:1, 5:1, 3:1, 2:1, 1:1, and 1:2, v/v) to afford six main fractions (A–F). Fr. E (29 g) was chromatographed on an MCI gel column (6  $\times$  80 cm) and eluted with CH<sub>3</sub>OH/H<sub>2</sub>O (30:70, 40:60, 50:50, 60:40, 70:30, 80:20, and 90:10, v/v) to get seven subfractions (Fr. E1–Fr. E7). Fraction E6 (5.5 g) was further purified on Sephadex LH-20 eluted with CH<sub>3</sub>OH to give six subfractions (Fr. E6-1–Fr. E6-6). Fr. E6-4 (1.2 g) was separated by MPLC over octadecylsilane (ODS), eluted with a step gradient of CH<sub>3</sub>OH/H<sub>2</sub>O (60:40–90:10, v/v, flow rate: 25 mL/min) to give six subfractions (Fr. E6-4A–Fr. E6-4F), and Fr. E6-4D (224 mg) purified by preparative HPLC (CH<sub>3</sub>CN/H<sub>2</sub>O, 60/40, v/v, flow rate: 8 mL/min) to yield **1** (8.7 mg,  $t_{\text{R}}$  18.6 min), **2** (11.2 mg,  $t_{\text{R}}$  21.4 min), and **3** (4.6 mg,  $t_{\text{R}}$  22.6 min) and Fr. E6-3D4. Fr. E6-4D4 (7.1 mg) was purified by Semi-preparative HPLC (CH<sub>3</sub>OH/H<sub>2</sub>O, 80/20, v/v, flow rate: 3 mL/min) to yield **4** (2.3 mg,  $t_{\text{R}}$  26.4 min) and **5** (2.5 mg,  $t_{\text{R}}$  18.1 min). Fr. E6-4E (72 mg) was purified by preparative HPLC (CH<sub>3</sub>CN/H<sub>2</sub>O, 60/40, v/v, flow rate: 8 mL/min) to yield **6** (34.2 mg,  $t_{\text{R}}$  21.8 min) and Fr. E6-4E2. Fr. E6-4E2 (26.7 mg) was purified by preparative HPLC (CH<sub>3</sub>OH/H<sub>2</sub>O, 80/20, v/v, flow rate: 8 mL/min) to yield **7** (17.5 mg,  $t_{\text{R}}$  38.4 min)

## Physical data of 1–5

Hypermonol A (**1**): colorless needle crystals, mp 171–172 °C;  $[\alpha]_D^{25}$ : +25.8 (MeOH, *c* 0.1); UV (MeOH)  $\lambda_{\max}$  (log  $\epsilon$ ): 201 (4.22), 211 (3.93), 240 (4.46) nm; ECD (MeOH)  $\lambda_{\max}$  ( $\Delta\epsilon$ ): 201 (+13.18), 254 (–0.94), 324 (+1.41) nm; IR (KBr)  $\nu_{\max}$ : 3443, 2921, 2851, 1767, 1706, 1645, 1467, 1384, 1132, 915  $\text{cm}^{-1}$ ; For  $^1\text{H}$  and  $^{13}\text{C}$  NMR data, see Table 1; HRESIMS  $m/z$  455.2421 ( $[\text{M} + \text{Na}]^+$ , calcd for  $\text{C}_{25}\text{H}_{36}\text{O}_6\text{Na}^+$ , 455.2410).

Hypermonol B (**2**): colorless needle crystals, mp 163–164 °C;  $[\alpha]_D^{25}$ : –64.6 (MeOH, *c* 0.1); UV (MeOH)  $\lambda_{\max}$  (log  $\epsilon$ ): 201 (4.24) nm, 211 (4.03) nm, 240 (4.42) nm; ECD (MeOH)  $\lambda_{\max}$  ( $\Delta\epsilon$ ): 207 (–14.08) nm, 233 (+6.72) nm, 329 (–2.67) nm; IR (KBr)  $\nu_{\max}$ : 3363, 2961, 2921, 2872, 1767, 1704, 1635, 1468, 1383, 1112, 914  $\text{cm}^{-1}$ ; For  $^1\text{H}$  and  $^{13}\text{C}$  NMR data, see Table 1; HRESIMS  $m/z$  455.2401 ( $[\text{M} + \text{Na}]^+$ , calcd for  $\text{C}_{25}\text{H}_{36}\text{O}_6\text{Na}^+$ , 455.2410).

Hypermonol C (**3**): white solids;  $[\alpha]_D^{25}$ : +10.4 (MeOH, *c* 0.1); UV (MeOH)  $\lambda_{\max}$  (log  $\epsilon$ ): 201 (4.34), 211 (4.17), 240 (4.64) nm; ECD (MeOH)  $\lambda_{\max}$  ( $\Delta\epsilon$ ): 200 (–11.2), 230 (+9.16), 326 (–3.43) nm; IR (KBr)  $\nu_{\max}$ : 3364, 2920, 2850, 1768, 1707, 1645, 1468  $\text{cm}^{-1}$ ; For  $^1\text{H}$  and  $^{13}\text{C}$  NMR data, see Table 2; HRESIMS  $m/z$  469.2554 ( $[\text{M} + \text{Na}]^+$ , calcd for  $\text{C}_{26}\text{H}_{38}\text{O}_6\text{Na}^+$ , 469.2566).

Hypermonol D (**4**): white solids;  $[\alpha]_D^{25}$ : +5.4 (MeOH, *c* 0.1); UV (MeOH)  $\lambda_{\max}$  (log  $\epsilon$ ): 201 (4.29), 211 (4.06), 240 (4.30) nm; ECD (MeOH)  $\lambda_{\max}$  ( $\Delta\epsilon$ ): 200 (–10.7), 231 (+7.53), 326 (–2.16) nm; IR (KBr)  $\nu_{\max}$ : 3445, 2968, 2933, 2875, 1764, 1737, 1698, 1460, 1381, 1109, 913  $\text{cm}^{-1}$ ; For  $^1\text{H}$  and  $^{13}\text{C}$  NMR data, see Table 2; HRESIMS  $m/z$  469.2554 ( $[\text{M} + \text{Na}]^+$ , calcd for  $\text{C}_{26}\text{H}_{38}\text{O}_6\text{Na}^+$ , 469.2566).

Hypermonol E (**5**): white solids;  $[\alpha]_D^{25}$ : +18.8 (MeOH, *c* 0.1); UV (MeOH)  $\lambda_{\max}$  (log  $\epsilon$ ): 201 (4.21), 211 (3.88), 240 (4.13) nm; ECD (MeOH)  $\lambda_{\max}$  ( $\Delta\epsilon$ ): 201 (+12.52), 246 (–0.23), 325 (+1.80) nm; IR (KBr)  $\nu_{\max}$ : 3423, 2924, 2874, 1743, 1665, 1458, 1148, 1066  $\text{cm}^{-1}$ ; For  $^1\text{H}$  and  $^{13}\text{C}$  NMR data, see Table 2; HRESIMS  $m/z$  469.2554 ( $[\text{M} + \text{Na}]^+$ , calcd for  $\text{C}_{26}\text{H}_{38}\text{O}_6\text{Na}^+$ , 469.2566).

## Single-crystal X-ray diffraction analysis

Crystal data for compound **1** (CCDC No. 2348446):  $M = \text{C}_{25}\text{H}_{36}\text{O}_6$ ,  $M = 432.54$ ,  $a = 8.53350(10)$  Å,  $b = 15.00880(10)$  Å,  $c = 19.05170(10)$  Å,  $\alpha = 90^\circ$ ,  $\beta = 90^\circ$ ,  $\gamma = 90^\circ$ ,  $V = 2440.10(4)$  Å<sup>3</sup>,  $T = 293(2)$  K, space group  $P2_12_12_1$ ,  $Z = 4$ ,  $\mu(\text{Cu K}\alpha) = 0.671$   $\text{mm}^{-1}$ , 13567 reflections measured, 4783 independent reflections ( $R_{\text{int}} = 0.0244$ ). The final  $R_1$  values were 0.0295 ( $I > 2\sigma(I)$ ). The final  $wR(F^2)$  values were 0.077. ( $I > 2\sigma(I)$ ). The final  $R_1$  values were 0.0301 (all data). The final  $wR(F^2)$  values were 0.0775 (all data). The goodness of fit on  $F^2$  was 1.046. Flack parameter = 0.01(4).

Crystal data for compound **2** (CCDC No. 2348447):  $\text{C}_{25}\text{H}_{36}\text{O}_6 \cdot \text{H}_2\text{O}$ ,  $M = 450.55$ ,  $a = 17.7841(6)$  Å,  $b = 40.4402(11)$  Å,  $c = 6.9564(2)$  Å,  $\alpha = 90^\circ$ ,  $\beta = 90^\circ$ ,  $\gamma = 90^\circ$ ,  $V = 5003.0(3)$  Å<sup>3</sup>,  $T = 150.(2)$  K, space group  $P2_12_12_1$ ,  $Z = 8$ ,  $\mu(\text{Cu K}\alpha) = 0.704$   $\text{mm}^{-1}$ , 35897 reflections measured, 9144 independent reflections ( $R_{\text{int}} = 0.1679$ ). The final  $R_1$  values were 0.0679 ( $I > 2\sigma(I)$ ). The final  $wR(F^2)$  values were 0.1719 ( $I > 2\sigma(I)$ ). The final  $R_1$  values were 0.0966 (all data). The final  $wR(F^2)$  values were 0.1940 (all data). The goodness of fit on  $F^2$  was 0.992. Flack parameter = 0.3(2).

## Cytotoxicity assay

The cytotoxicity of the title compounds was tested through MTT analysis on H9C2 cells. Cells were seeded in 96-well plates at a density of  $1 \times 10^4$  cells/well. At the end of 24 h, the cells were treated with test compounds and incubated at 37 °C for 24 h. MTT (Sigma) was added to each well with a final concentration of 0.5 mg/ml and incubated for 4 h. Then, the medium was decanted, and 150  $\mu\text{L}$  of DMSO was added to each well. The absorbance was obtained by a microplate reader (B20-TEKELX800UV, USA) at 570 nm, and all

measurements were conducted three times under the same condition. Quercetin (50  $\mu\text{M}$ ) served as a positive control.

#### **Assay for testing the protective effects against myocardial cell injury induced by $\text{H}_2\text{O}_2$**

H9C2 cells (the Cell Bank of the Chinese Academy of Sciences Shanghai, China) were seeded into 96-well flat microtiter plates at a density of  $1 \times 10^4$  per well and allowed 24 h to adhere before drugs were introduced. After incubation with different concentrations of compounds **1–5** for 12 h, the cells were treated with 600  $\mu\text{M}$   $\text{H}_2\text{O}_2$  for 4 h. The cells in the control groups were treated with the same volume of phosphate-buffered saline (PBS). Cell viability was evaluated by 3-(4,5-dimethylthiazol-2-yl)-2,5-diphenyltetrazolium bromide (MTT) assay, which is based on the reduction of MTT by the mitochondrial dehydrogenase of intact cells to a purple formazan product. Absorbance was read on an ELISA plate reader at 540 nm as a measure of quantity of formazan, the percentage cell viability was calculated as a ratio of optical density (OD) value of sample to the OD value of control. All experiments were done for three times, and quercetin (50  $\mu\text{M}$ ) served as a positive control.

#### **Western blotting**

H9C2 cells were washed with ice-cold PBS, pelleted by cell scraper and lysed in 100  $\mu\text{L}$  lysis buffer containing 1  $\mu\text{L}$  phosphatase inhibitor, 0.1  $\mu\text{L}$  protease inhibitor and 0.5  $\mu\text{L}$  PMSF. The extracted proteins were quantified with the bicinchoninic acid Protein assay kit (Thermo Fisher Scientific, Inc.). A total of 20  $\mu\text{g}$  protein extracts per lane were separated by 6-15% SDS-PAGE. The proteins were transferred onto polyvinylidene difluoride membranes or nitrocellulose filter membrane. The membranes were blocked with 5% BSA (Gibco; Thermo Fisher Scientific, Inc.) at room temperature for 2 h and incubated overnight at 4°C with primary antibodies against rabbit anti-Akt (1:1,000; cat. no. 9272), rabbit anti-phosphorylated (p)-Akt (p-Akt; 1:1000; cat. no.4060), rabbit anti-mTOR (1:1000; cat.no.2983), rabbit anti-p-mTOR (p-mTOR;1:1000; cat. no. 5536), and rabbit anti-GAPDH (1:1000; cat. no. 5174; all from Cell Signaling Technology, Inc.). The membranes were subsequently washed for 2 h with TBST (10 mM Tris, pH 7.5, 150 mM NaCl, and 0.05% Tween-20), and incubated with horseradish peroxidase-conjugated goat anti-rabbit secondary antibody (1:500; cat. no.sc-2004; Santa Cruz Biotechnology, Inc.) for 1 h at room temperature. The antigen-antibody complexes on the membranes were detected using the SuperSignal™ West Femto Maximum Sensitivity substrate (Thermo Fisher Scientific, Inc.) and quantified on the ChemiDoc™ XRS Imaging system (Bio-Rad Laboratories, Inc.).

#### **Prediction of potential targets**

The targets of **1** were obtained from SwissTargetPrediction (<http://swisstargetprediction.ch>), PharmMapper (<http://www.lilab-ecust.cn/pharmmapper>), Targetnet (<http://targetnet.scbdd.com>), STITCH (<http://stitch.embl.de>), and SEA (<https://sea.bkslab.org>) databases. The potential targets of myocardial ischemia were screened from DisGeNET (<https://www.disgenet.org>), OMIM (<https://omim.org>) and Genecards (<https://www.genecards.org>) online databases. To investigate interactions between compounds and their target proteins, target genes for **1**, used in myocardial ischemiatreatment, were obtained through the intersection and then uploaded to the String database (<https://string-db.org>), with "Homo sapiens" specified as the species, to construct a protein-protein interaction (PPI) network. Cytoscape 3.9.1

Structure-based virtual screening (SBVS) was performed on the basis of their 3D structures and the 3568 pharmacophores in ePharmaLib. Finally, 432 PDB protein hits (96 unique proteins) were retrieved for **1**. The top-ten human protein hits were show in Table S7.

#### **Molecular docking**

The protein hits, given by literature analysis above, were used as receptors for molecular docking. All the 3D structures of these targets were downloaded from the PDB database (PDB web site: <https://www.rcsb.org>). Molecular docking studies were carried out using Maestro from Schrödinger. Protein Preparation wizard was used to refine the raw PDB structure and the corrections were carried out. **1** was prepared and optimized potential for liquid simulations (OPLS 2005) force field using LigPrep. Grid box was prepared for protein-ligand binding. Ligand docking was performed in extra precision mode. XP visualizer analyzes the specific ligand-protein interactions and the docking score. The best scoring conformation was utilized to demonstrate the bond formed between the ligand and the binding pocket of receptors based on the Protein-Ligand Interaction Profiler (PLIP) and further visualized using PyMOL 2.5.

#### NMR calculation details for 3 and 4

##### Methods

In general, conformational analyses were carried out via random searching in the Sybyl-X 2.0 using the MMFF94S force field with an energy cutoff of 5.0 kcal/mol.<sup>[1]</sup> The results showed nine lowest energy conformers. Subsequently, the conformers were re-optimized at the B3LYP-D3(BJ)/6-31G\* level in PCM chloroform by the GAUSSIAN09 program.<sup>[2]</sup> All conformers used for property calculations in this work were characterized to be stable point on potential energy surface (PES) with no imaginary frequencies. NMR shielding constants were computed using the GIAO method at the mPW1PW91/6-311+G(d,p)//ωB97XD/6-31G(d) level in PCM chloroform by the GAUSSIAN09 program.<sup>[2]</sup> Gibbs free energies for conformers were determined by using thermal correction at B3LYP-D3(BJ)/6-31G\* level and electronic energies evaluated at the ωB97M-V/def2-TZVP level in PCM chloroform using ORCA<sup>[3][4]</sup> Boltzmann weights were computed using relative gibbs free energies.<sup>[5]</sup> The unscaled chemical shifts ( $\delta_u$ ) were computed using TMS (Tetramethylsilane) as a reference standard according to  $\delta_u = \delta_0 - \delta_x$ , where  $\delta_x$  is the Boltzmann averaged shielding tensor (over all significantly populated conformations) and  $\delta_0$  is the shielding tensor of the TMS computed at the same level of theory employed for  $\delta_x$ . The scaled chemical shifts ( $\delta_s$ ) were calculated as  $\delta_s = (\delta_u - b)/m$ , where m and b are the slope and intercept, respectively, deduced from a linear regression calculation on a plot of  $\delta_u$  against  $\delta_{exp}$ . The DP4+ calculations were run by the Excel spreadsheet available for free at [sarotti-nmr.weebly.com](http://sarotti-nmr.weebly.com) or as part of the Supporting Information of the original paper.<sup>[5]</sup>

[1] Sybyl Software, version X 2.0; Tripos Associates Inc.: St. Louis, MO, 2013.

[2] Gaussian 09, Revision E.01, M. J. Frisch, G. W. Trucks, H. B. Schlegel, G. E. Scuseria, M. A. Robb, J. R. Cheeseman, G. Scalmani, V. Barone, B. Mennucci, G. A. Petersson, H. Nakatsuji, M. Caricato, X. Li, H. P. Hratchian, A. F. Izmaylov, J. Bloino, G. Zheng, J. L. Sonnenberg, M. Hada, M. Ehara, K. Toyota, R. Fukuda, J. Hasegawa, M. Ishida, T. Nakajima, Y. Honda, O. Kitao, H. Nakai, T. Vreven, J. A. Montgomery, Jr., J. E. Peralta, F. Ogliaro, M. Bearpark, J. J. Heyd, E. Brothers, K. N. Kudin, V. N. Staroverov, R. Kobayashi, J. Normand, K. Raghavachari, A. Rendell, J. C. Burant, S. S. Iyengar, J. Tomasi, M. Cossi, N. Rega, J. M. Millam, M. Klene, J. E. Knox, J. B. Cross, V. Bakken, C. Adamo, J. Jaramillo, R. Gomperts, R. E. Stratmann, O. Yazyev, A. J. Austin, R. Cammi, C. Pomelli, J. W. Ochterski, R. L. Martin, K. Morokuma, V. G. Zakrzewski, G. A. Voth, P. Salvador, J. J. Dannenberg, S. Dapprich, A. D. Daniels, J. P. Farkas, J. B. Foresman, J. V. Ortiz, J. Cioslowski, and D. J. Fox, Gaussian, Inc., Wallingford CT, 2009.

[3] Neese, F. (2012) The ORCA program system, Wiley Interdiscip. Rev.: Comput. Mol. Sci., 2, 73–78

[4] Neese, F. (2017) Software update: the ORCA program system, version 4.0, Wiley Interdiscip. Rev.: Comput. Mol. Sci., 8, e1327.

[5] Nicolás Grimblat, María M. Zanardi, and Ariel M. Sarotti J. Org. Chem. 2015, 80, 12526–12534.

## ECD calculation details for 2

### Methods

In general, conformational analyses were carried out via random searching in the Sybyl-X 2.0 using the MMFF94S force field with an energy cutoff of 5 kcal/mol.<sup>[1]</sup> The results showed nine lowest energy conformers. Subsequently, geometry optimizations and frequency analyses were implemented at the B3LYP-D3(BJ)/6-31G\* level in CPCM methanol using ORCA5.0.3<sup>[2]</sup> All conformers used for property calculations in this work were characterized to be stable point on potential energy surface (PES) with no imaginary frequencies. The excitation energies, oscillator strengths, and rotational strengths (velocity) of the first 60 excited states were calculated using the TD-DFT methodology at the PBE0/def2-TZVP level in CPCM methanol using ORCA5.0.3.<sup>[2]</sup> The ECD spectra were simulated by the overlapping Gaussian function (half the bandwidth at 1/e peak height,  $\sigma = 0.30$  for all).<sup>[3]</sup> Gibbs free energies for conformers were determined by using thermal correction at B3LYP-D3(BJ)/6-31G\* level and electronic energies evaluated at the wB97M-V/def2-TZVP level in CPCM methanol using ORCA5.0.3<sup>[2]</sup> To get the final spectra, the simulated spectra of the conformers were averaged according to the Boltzmann distribution theory and their relative Gibbs free energy ( $\Delta G$ ). By comparing the experiment spectra with the calculated model molecules, the absolute configuration of the only chiral center was determined to be 4*S*,6*R*,8*S*,9*R*,12*R*,13*S*,23*R*.

[1] Sybyl Software, version X 2.0; Tripos Associates Inc.: St. Louis, MO, 2013.

[2] Neese, F. (2012) The ORCA program system, Wiley Interdiscip. Rev.: Comput. Mol. Sci., 2, 73-78.

[3] Stephens, P. J.; Harada, N. ECD Cotton effect approximated by the Gaussian curve and other methods. *Chirality* 2010, 22, 229–233.



**Table S1.** Top-ten ranking human protein hits of **1** and docking score

|          | PDBID | docking score |
|----------|-------|---------------|
| AKT      | 6hhi  | -10.5         |
| EGFR     | 2xkn  | -8.4          |
| HSP90AB1 | 5ucj  | -8.1          |
| mTOR     | 4j6t  | -9.1          |
| GSK3B    | 5f95  | -8.3          |
| SRC      | 1skj  | -6.2          |
| MDM2     | 4jrg  | -7.6          |
| PIK3CA   | 7r9v  | -8.4          |
| MAPK1    | 2ojj  | -9.0          |
| HSP90AA1 | 5h22  | -8.3          |

**Figure S1.** Comparison of the NMR spectroscopic data between **1** and **2** and between **3** and **4**.

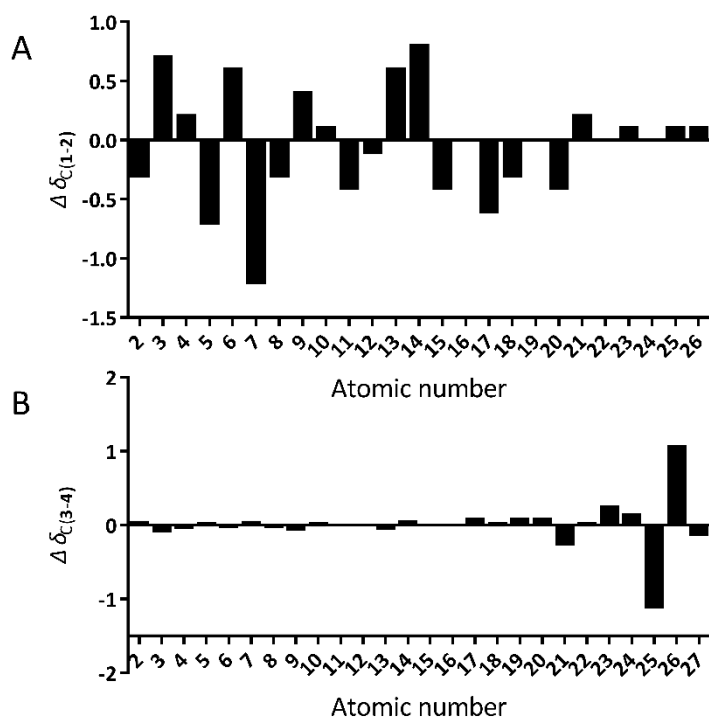

**Figure S2.**  $R^2$  analysis of  $^{13}\text{C}$  NMR chemical shifts of **3** and **4** based on the calculated and experimental values.

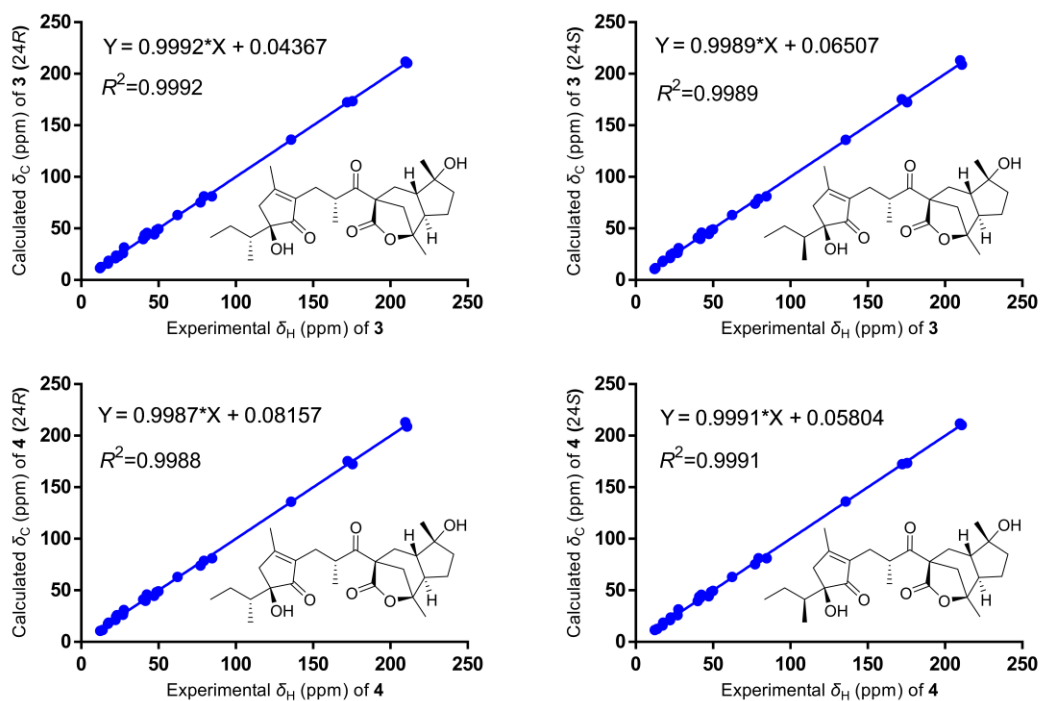

**Figure S3.** 2D and 3D ligand interactions of **1** with 4jt6-mTOR and 6hhi-AKT.

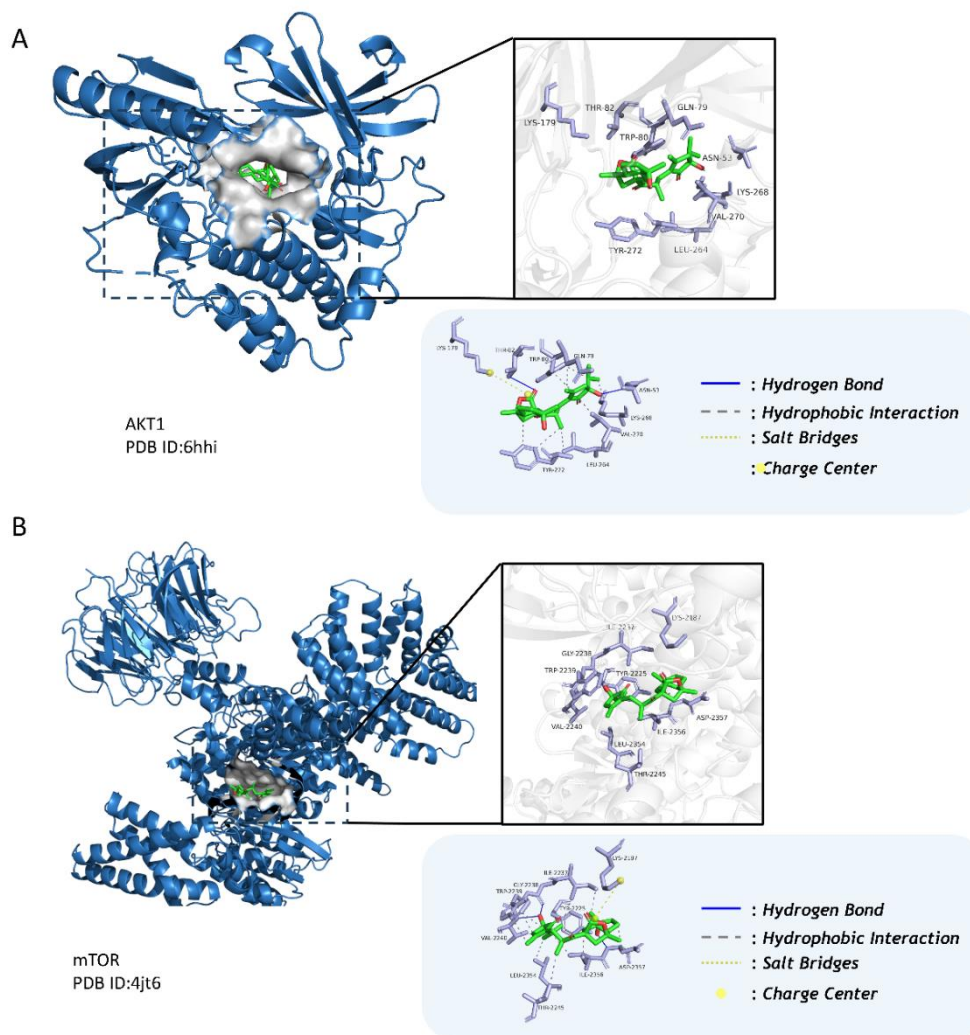

Figure S4. 2D ligand interactions of **1** with top-ten ranking human protein hits.

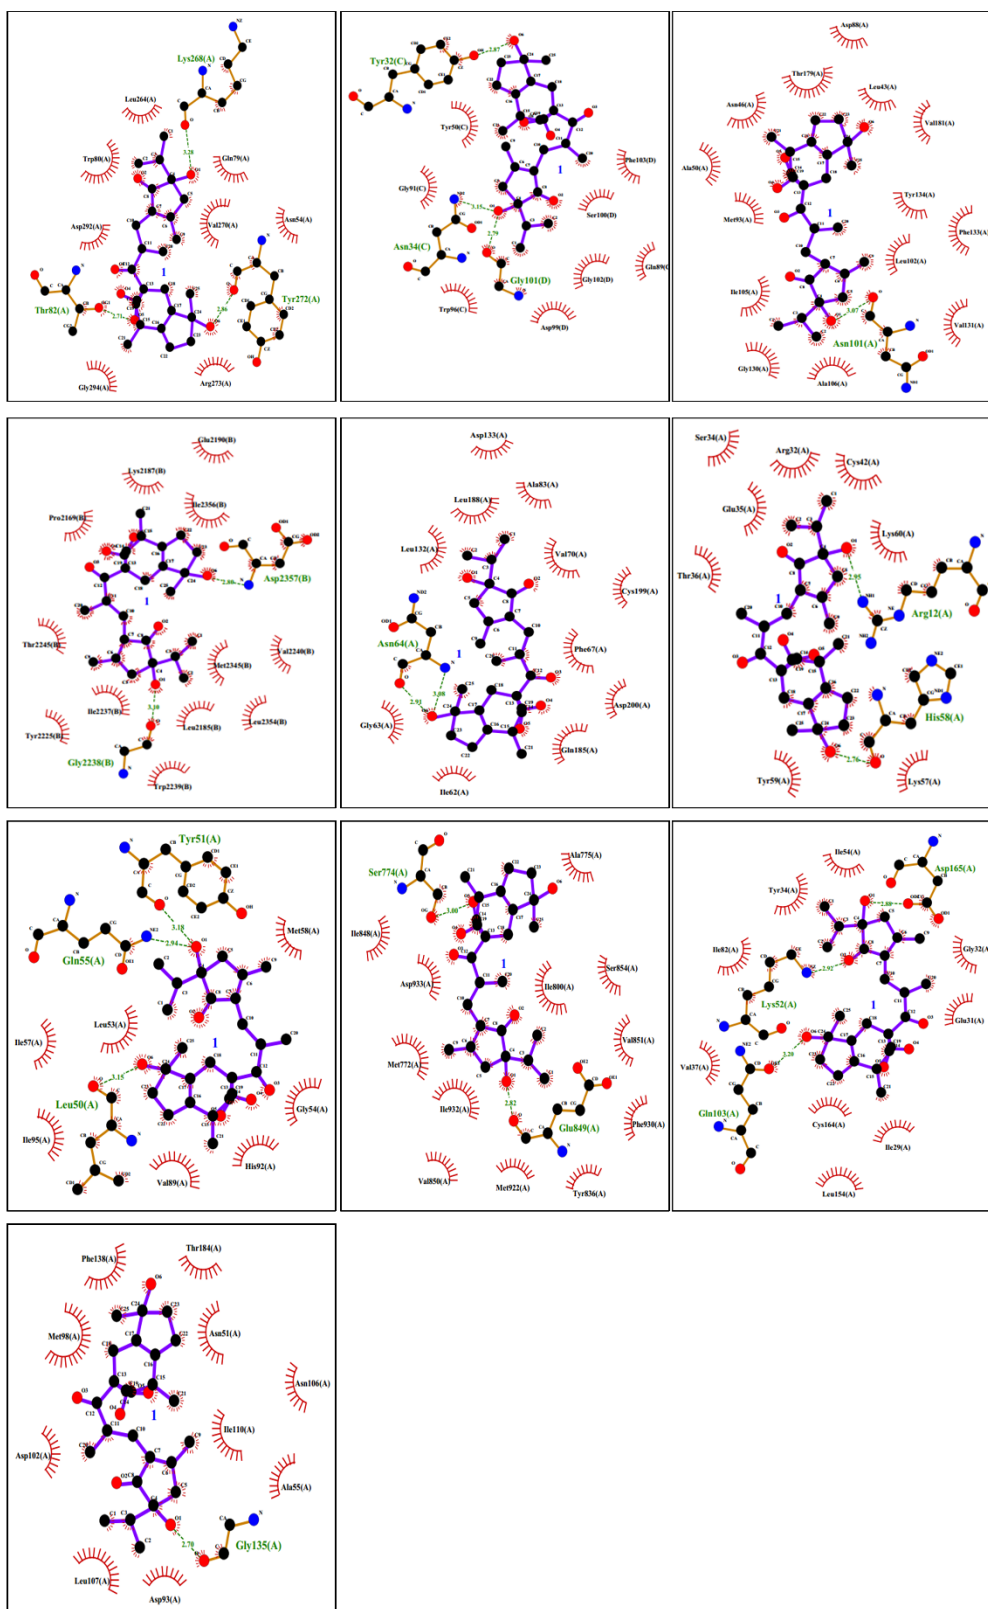

**Figure S5.** The raw images for all Western blot.

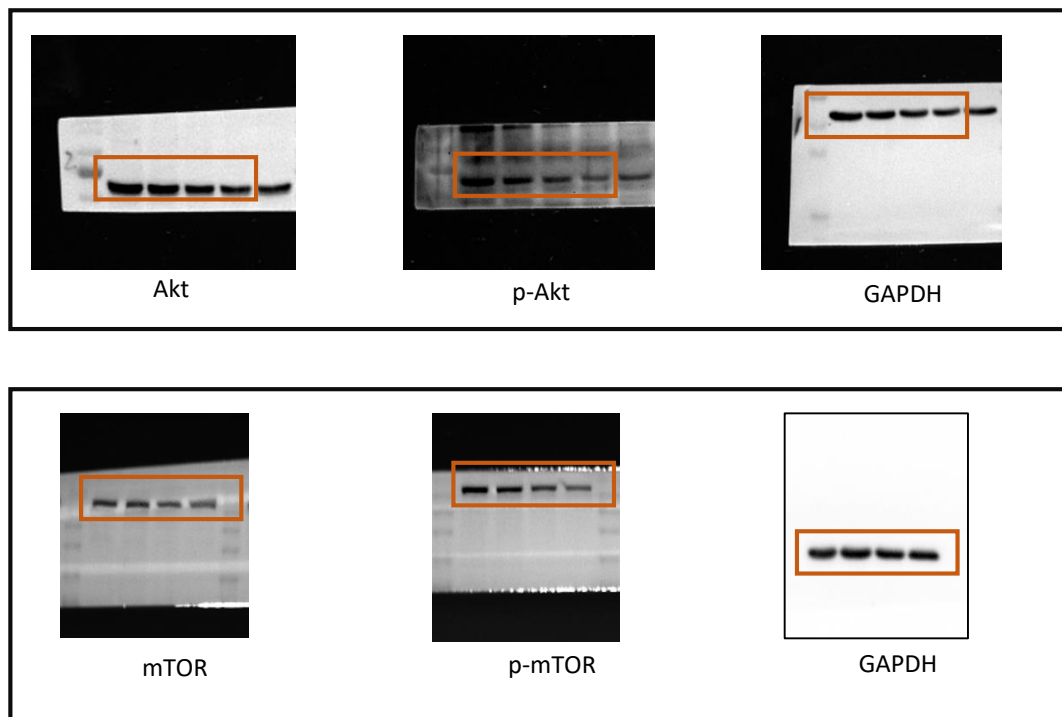

Figure S6. <sup>1</sup>H NMR spectrum of compound 1 (recorded in chloroform-*d*)

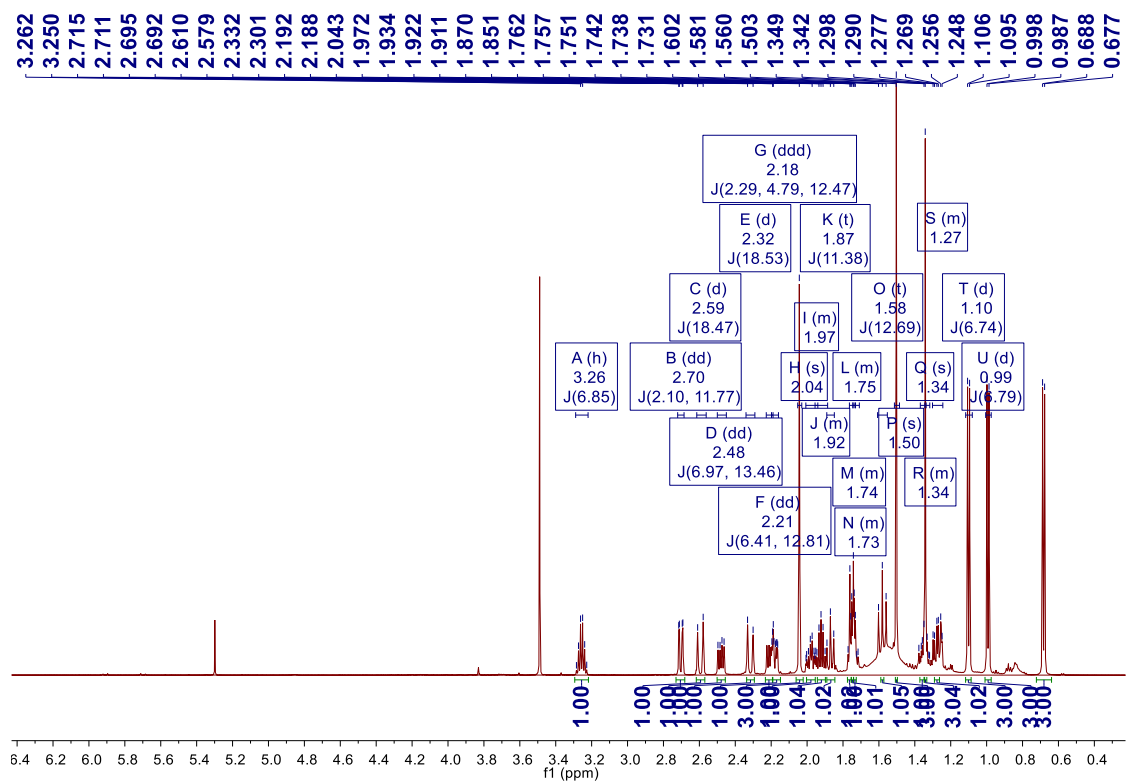

Figure S7. <sup>13</sup>C NMR spectrum of compound 1 (recorded in chloroform-*d*)

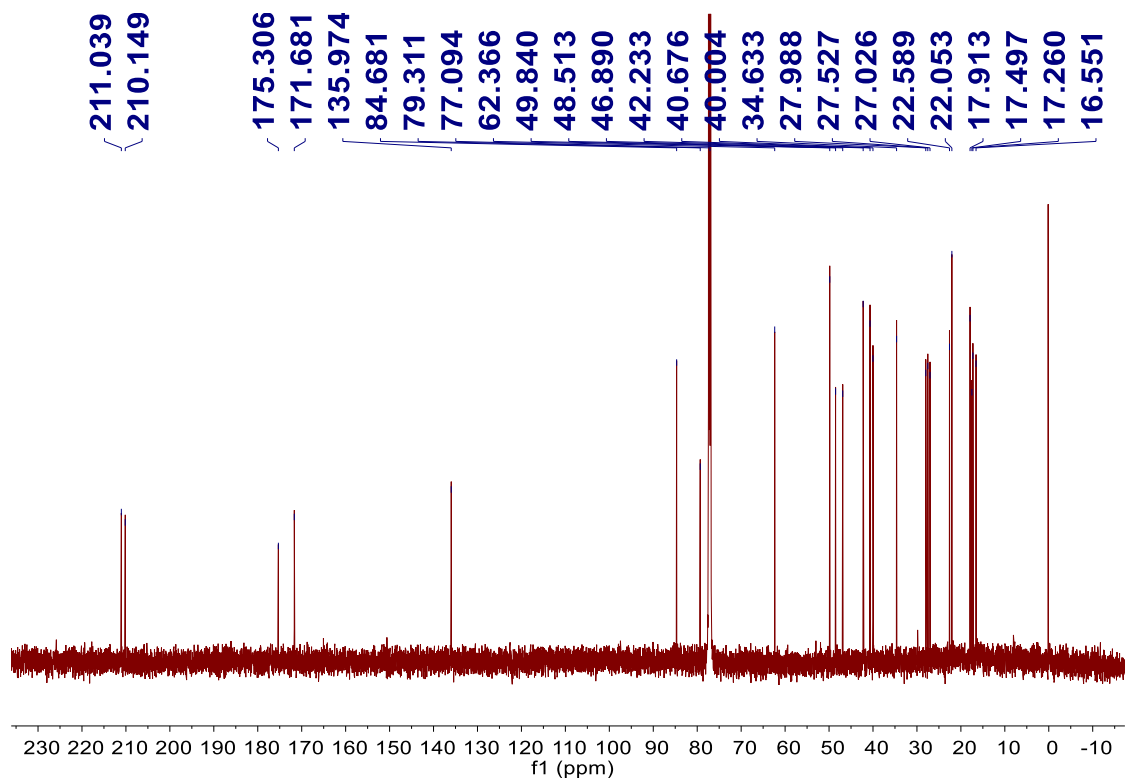

Figure S8. DEPT spectrum of compound **1** (recorded in chloroform-*d*)

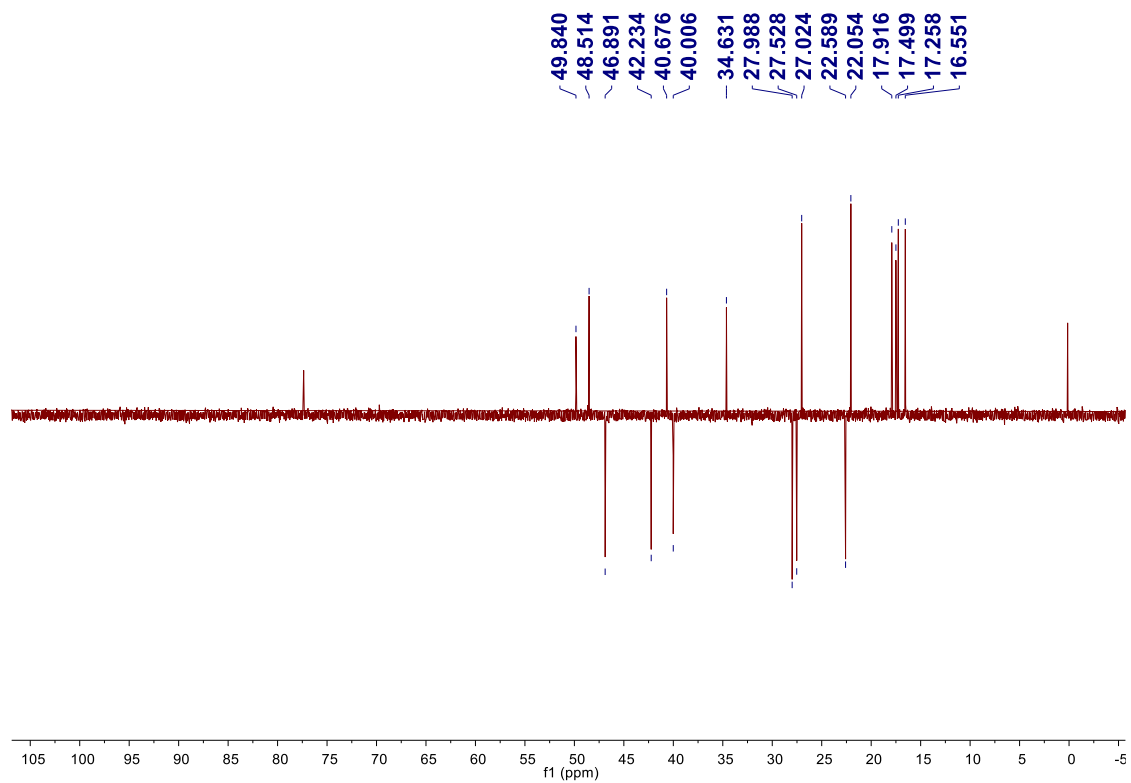

Figure S9. HSQC spectrum of compound **1** (recorded in chloroform-*d*)

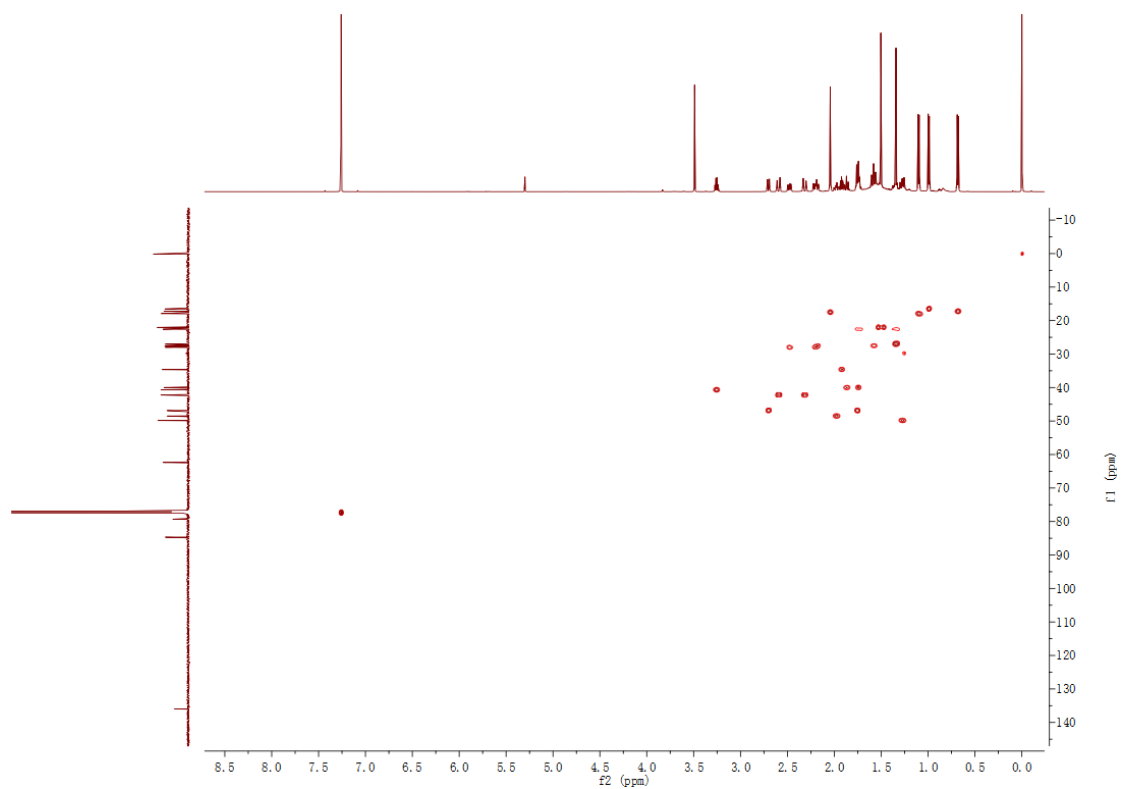

**Figure S10.** HMBC spectrum of compound **1** (recorded in chloroform-*d*)

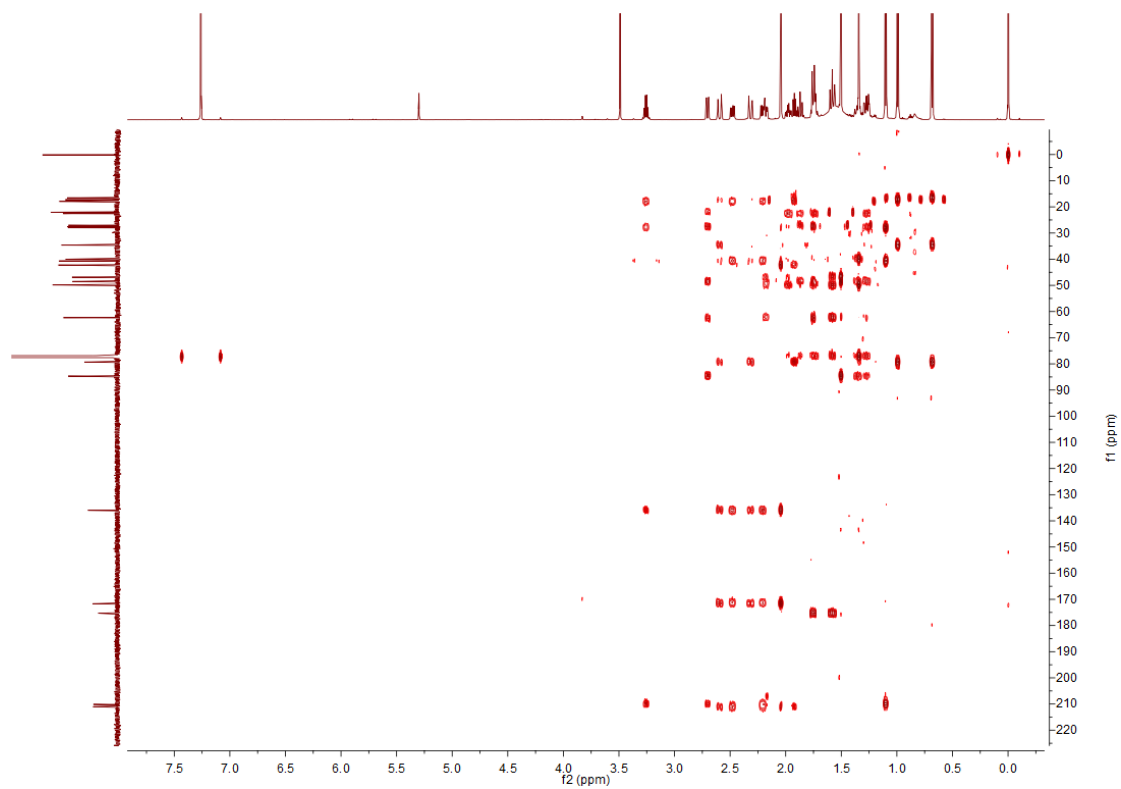

**Figure S11.**  $^1\text{H}$ - $^1\text{H}$  COSY spectrum of compound **1** (recorded in chloroform-*d*)

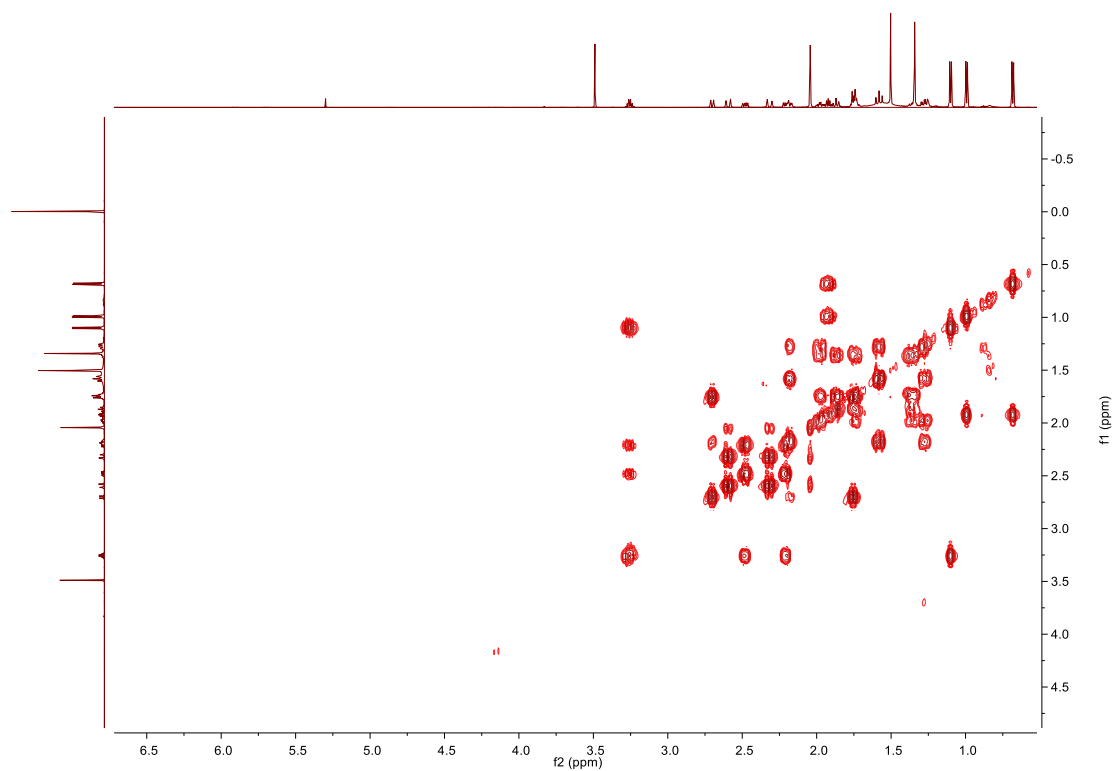



**Figure S12.** ROESY spectrum of compound **1** (recorded in chloroform-*d*)

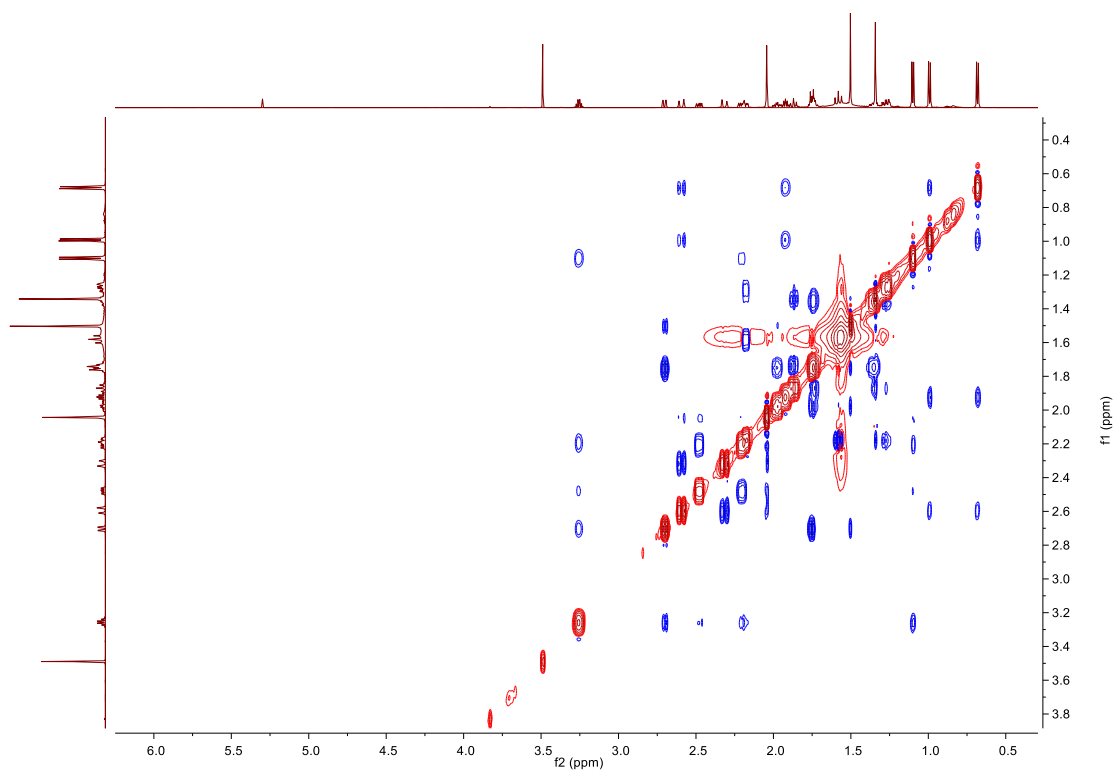

**Figure S13.** HRESIMS spectrum of compound **1**

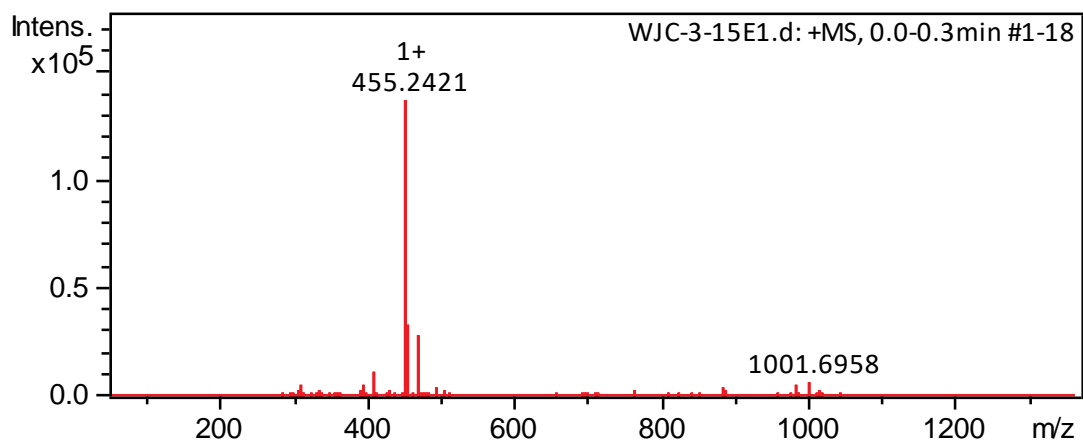

Figure S14. IR spectrum of compound 1

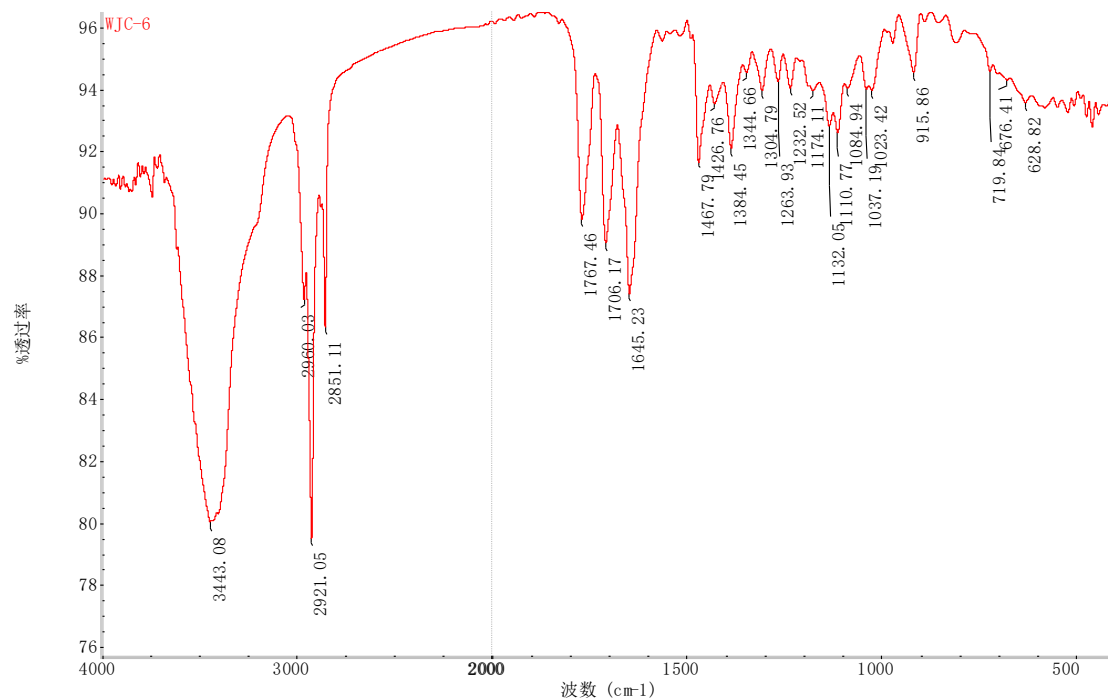

Figure S15. UV spectrum of compound 1

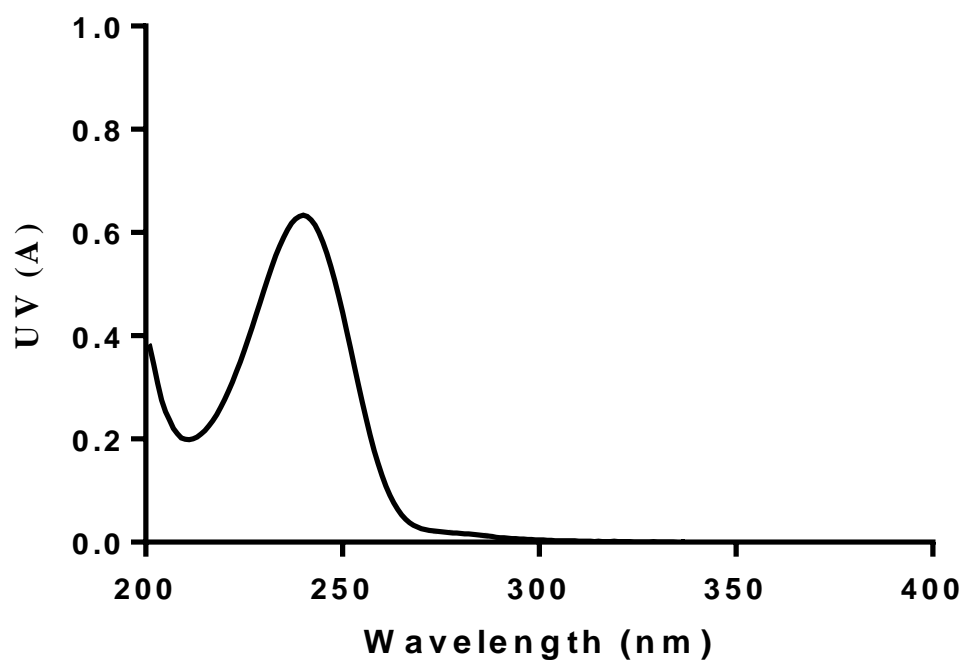



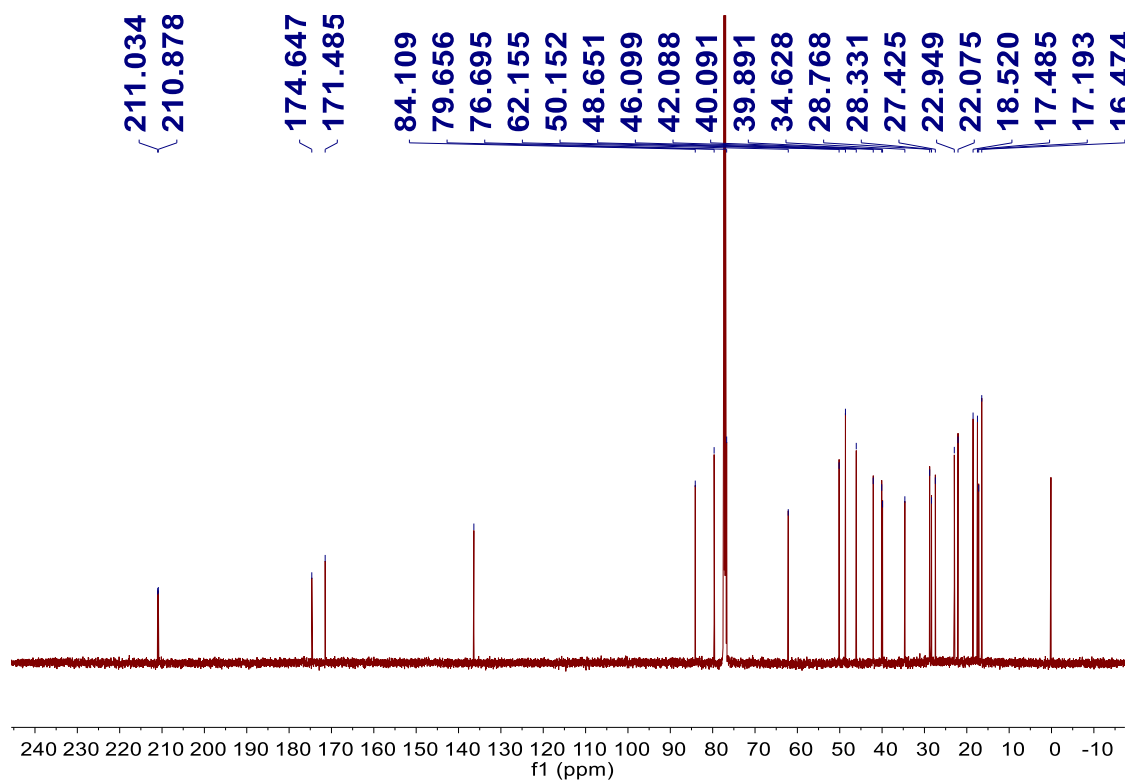

Figure S19. DEPT spectrum of compound 2 (recorded in chloroform-d)

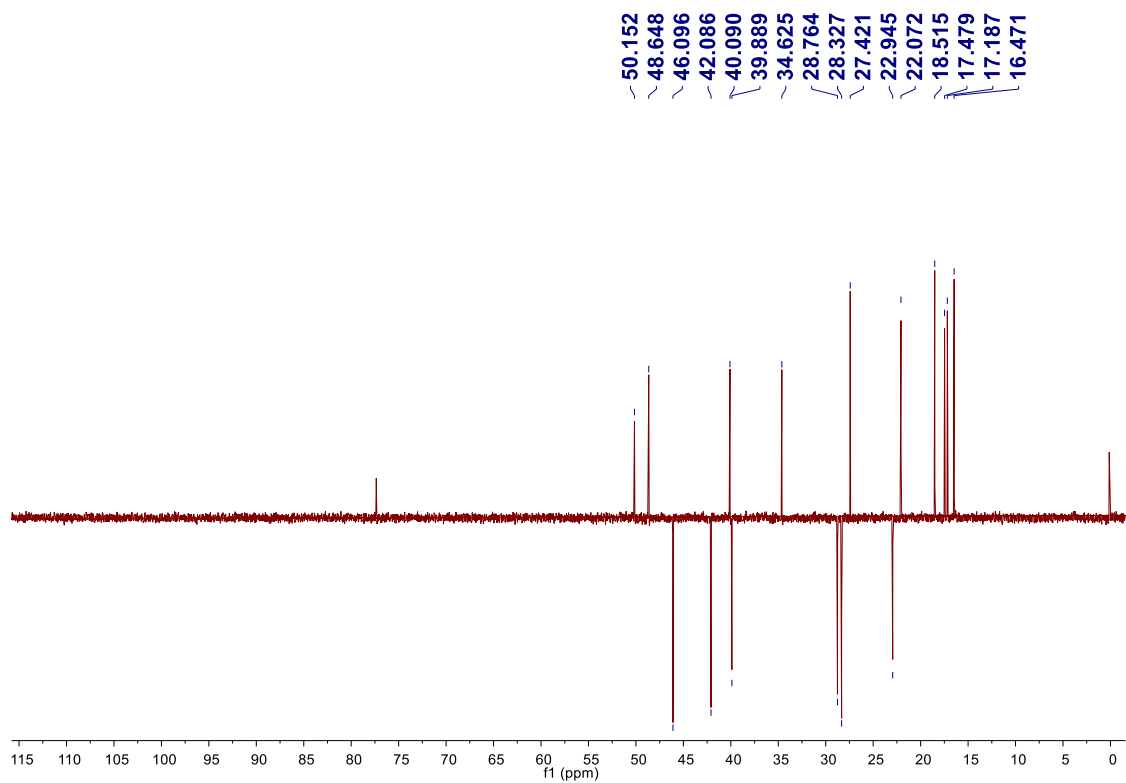

**Figure S20.** HSQC spectrum of compound **2** (recorded in chloroform-*d*)

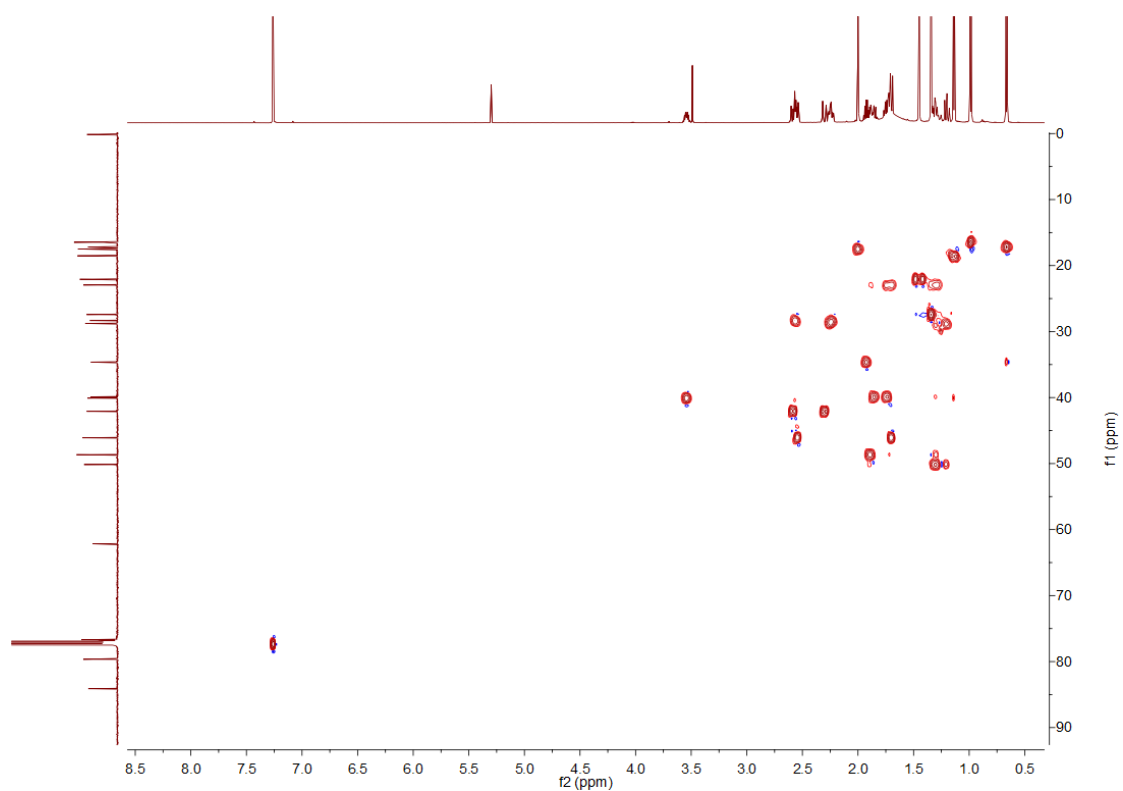

**Figure S21.** HMBC spectrum of compound **2** (recorded in chloroform-*d*)

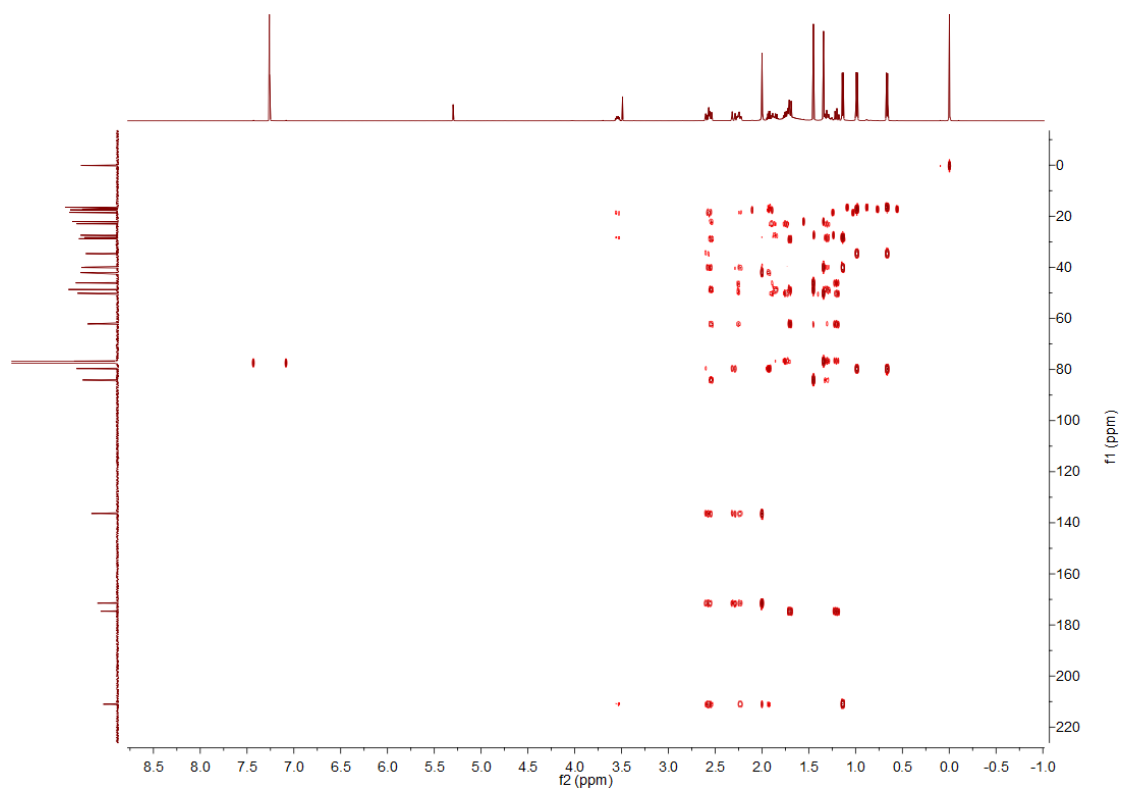

Figure S22.  $^1\text{H}$ - $^1\text{H}$  COSY spectrum of compound **2** (recorded in chloroform-*d*)

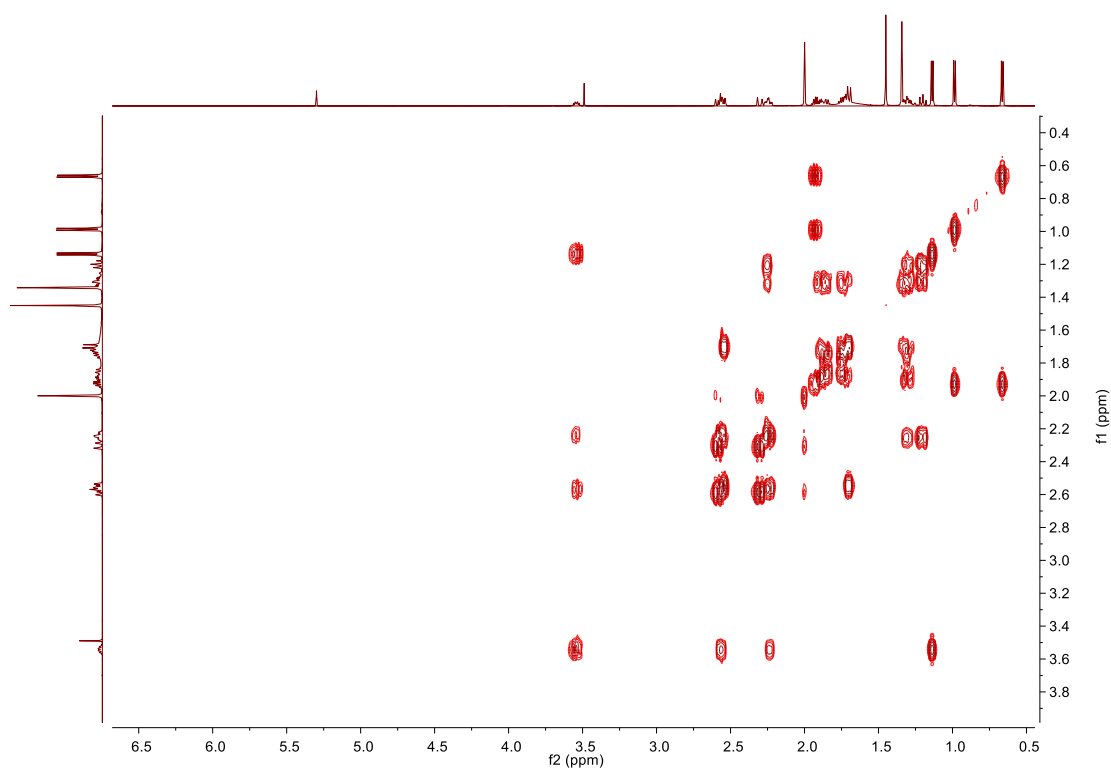

Figure S23. ROESY spectrum of compound **2** (recorded in chloroform-*d*)

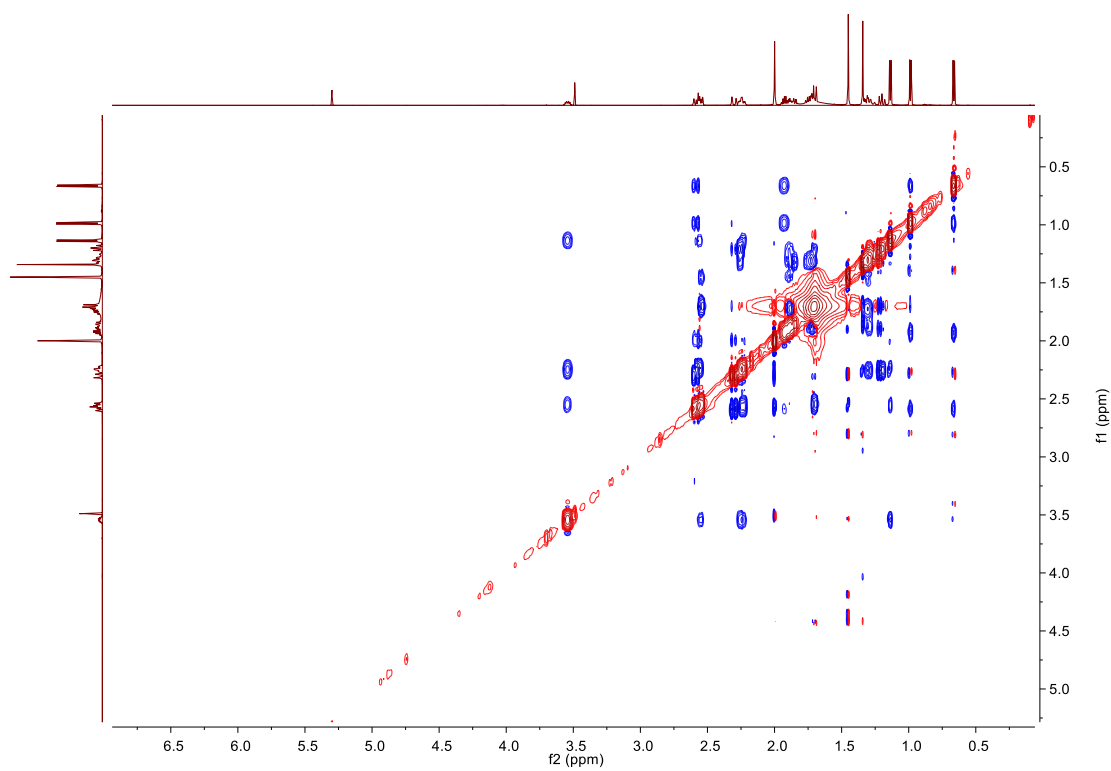

Figure S24. HRESIMS spectrum of compound 2

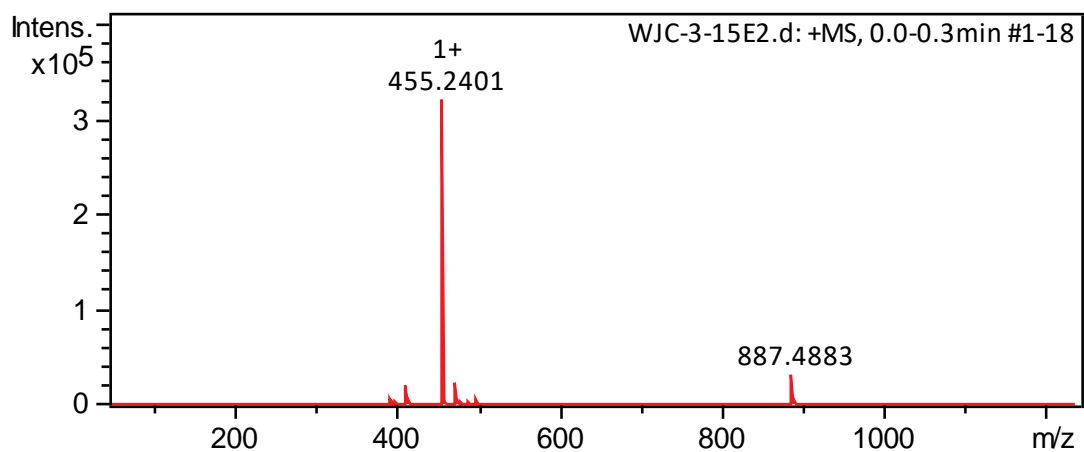

Figure S25. IR spectrum of compound 2

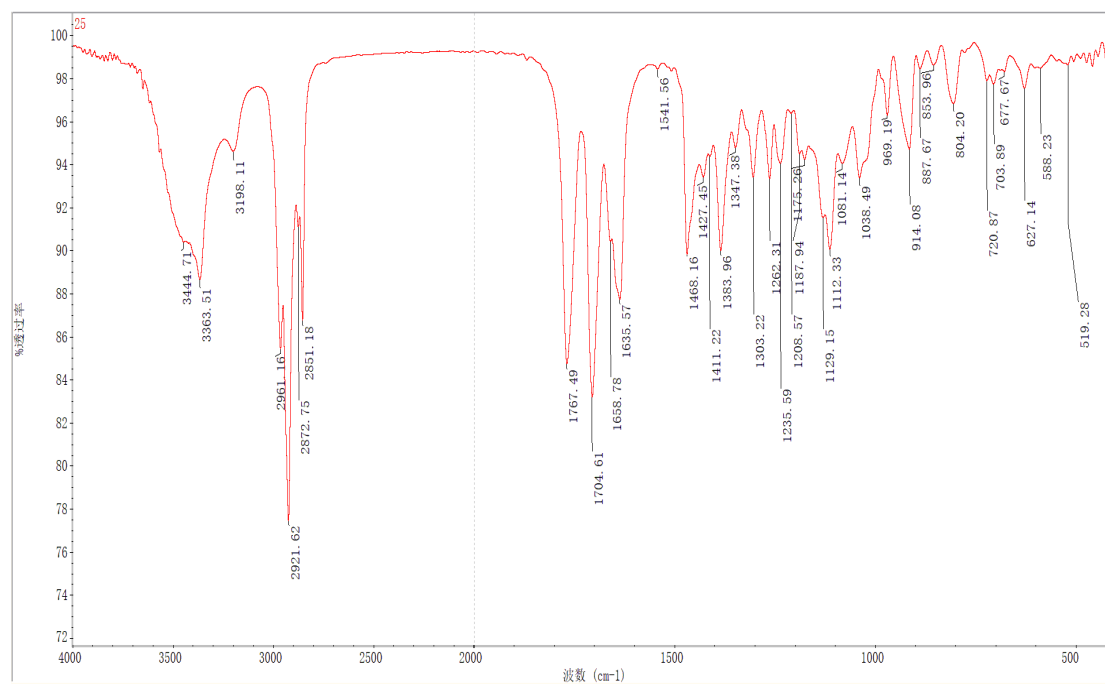

Figure S26. UV spectrum of compound **2**

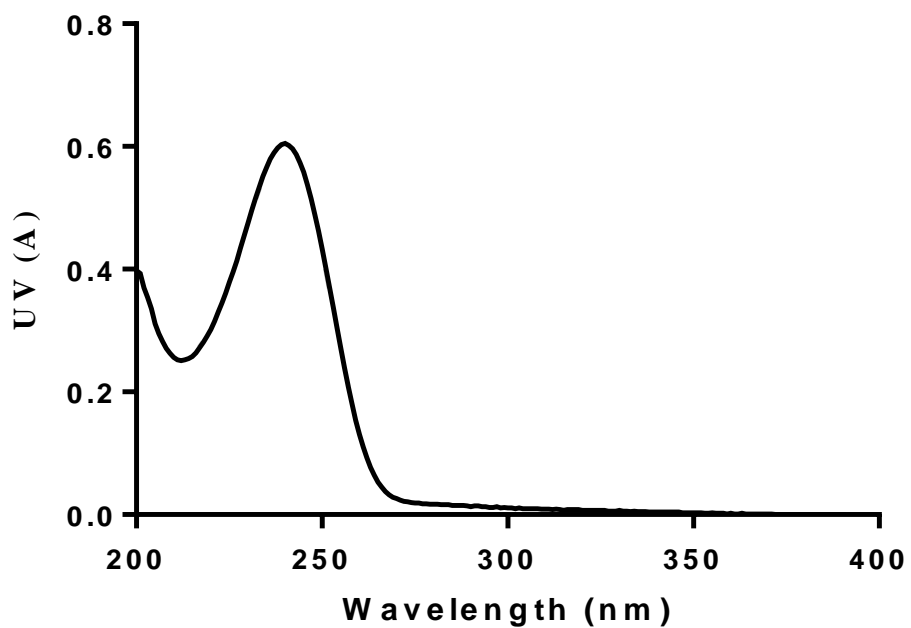

Figure S27. CD spectrum of **2** in methanol

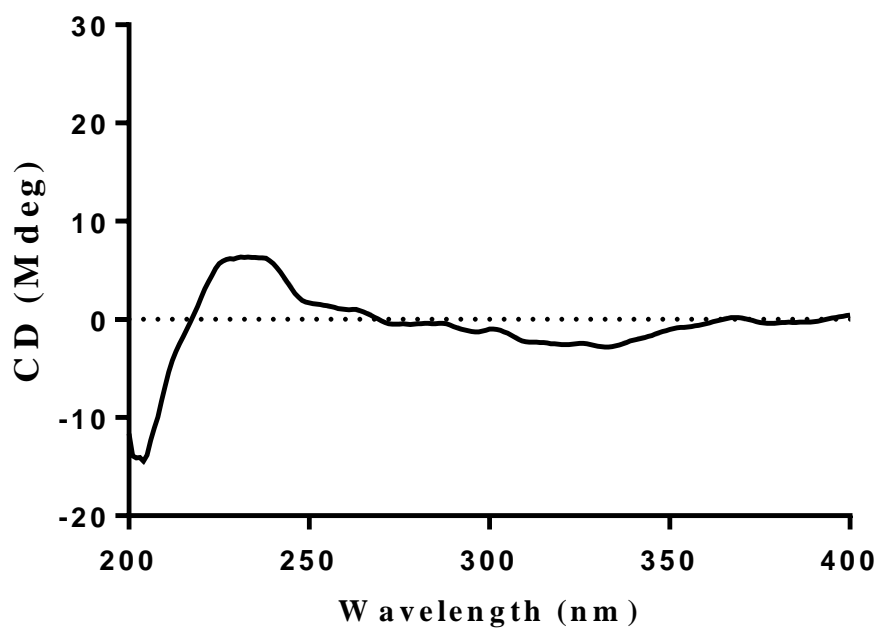



Figure S28. <sup>1</sup>H NMR spectrum of compound **3** (recorded in chloroform-*d*)

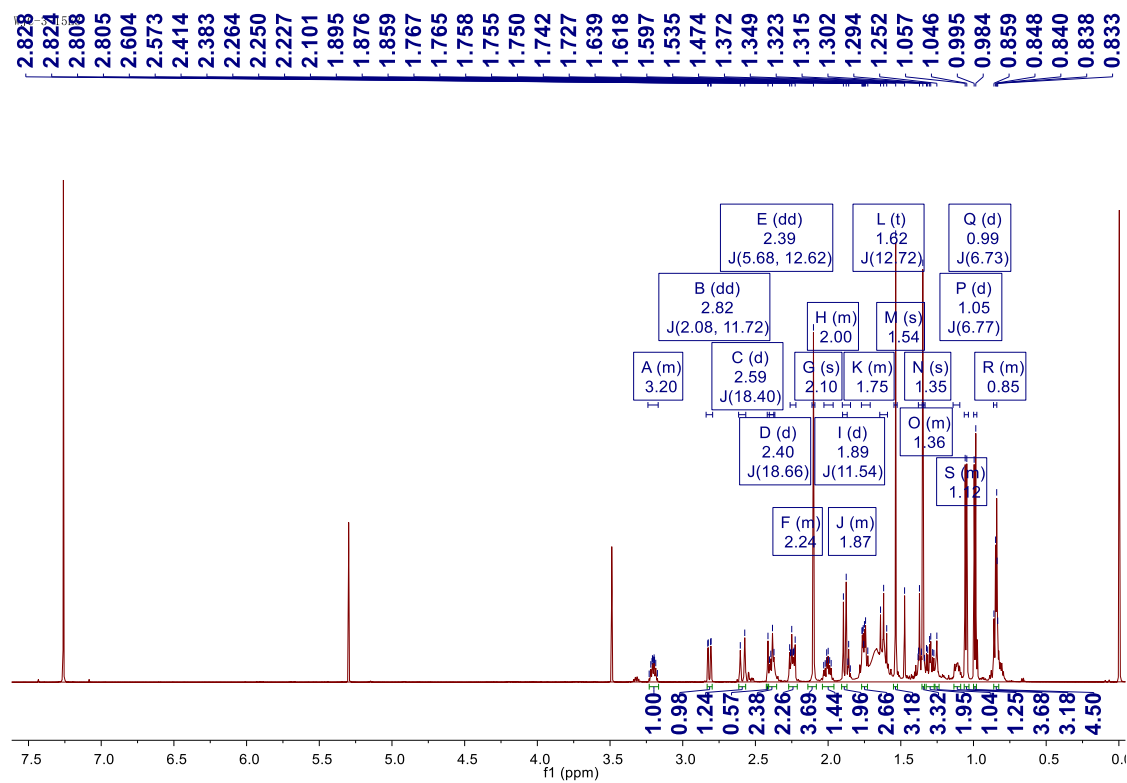

Figure S29. <sup>13</sup>C NMR spectrum of compound **3** (recorded in chloroform-*d*)

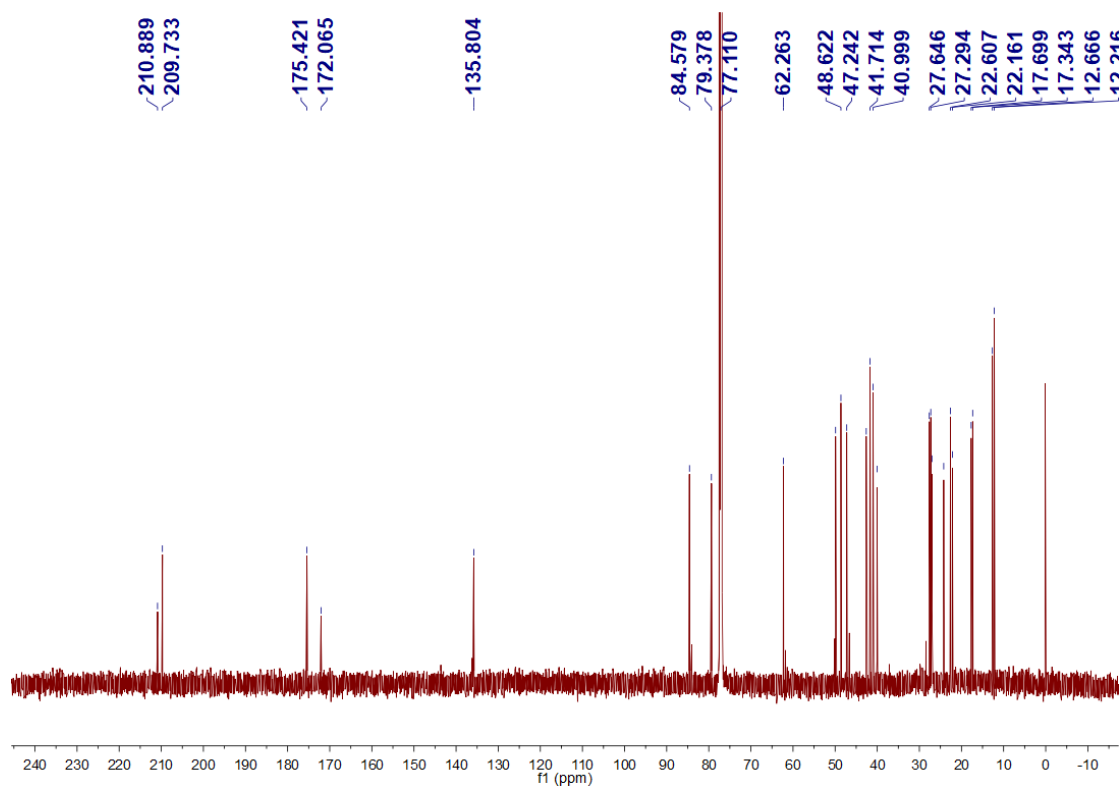

Figure S30. DEPT spectrum of compound **3** (recorded in chloroform-*d*)

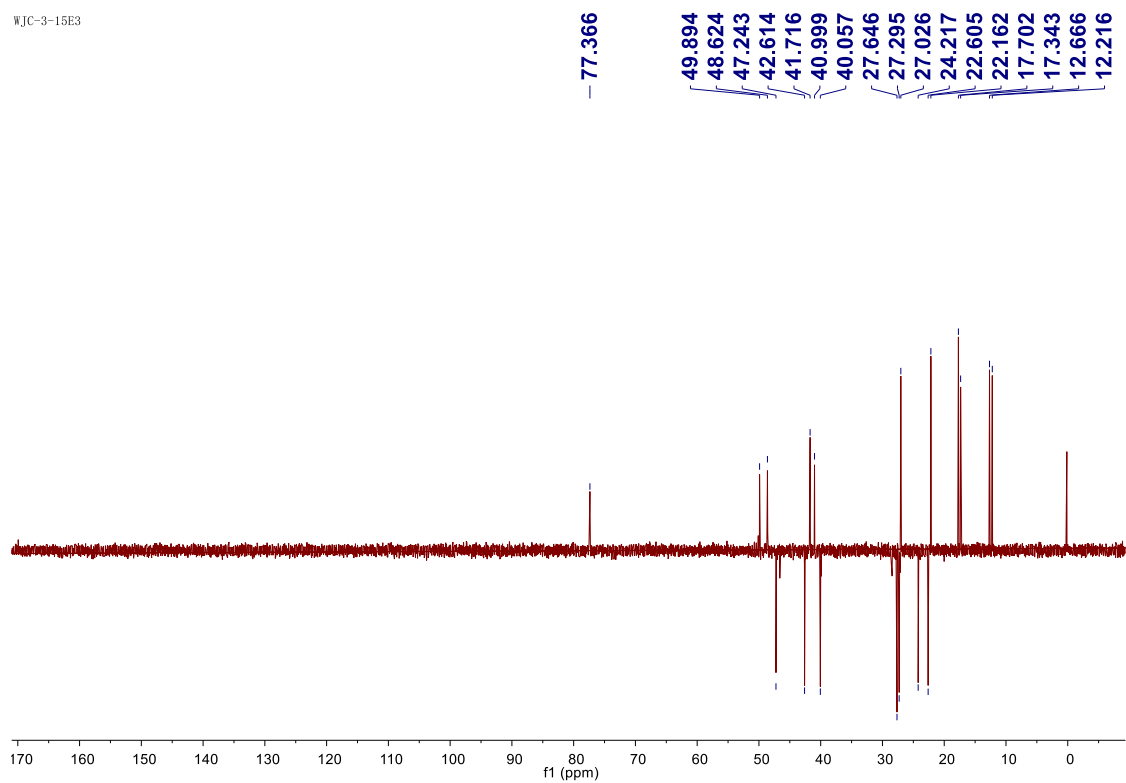

Figure S31. HSQC spectrum of compound **3** (recorded in chloroform-*d*)

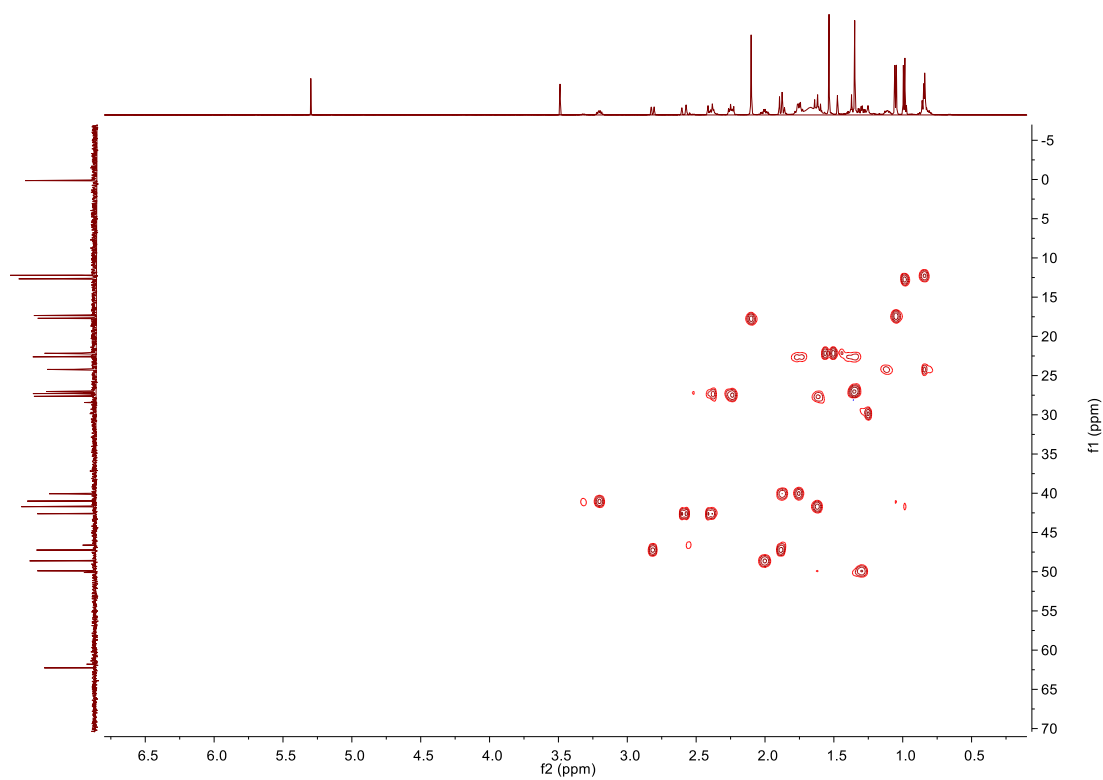

Figure S32. HMBC spectrum of compound **3** (recorded in chloroform-*d*)

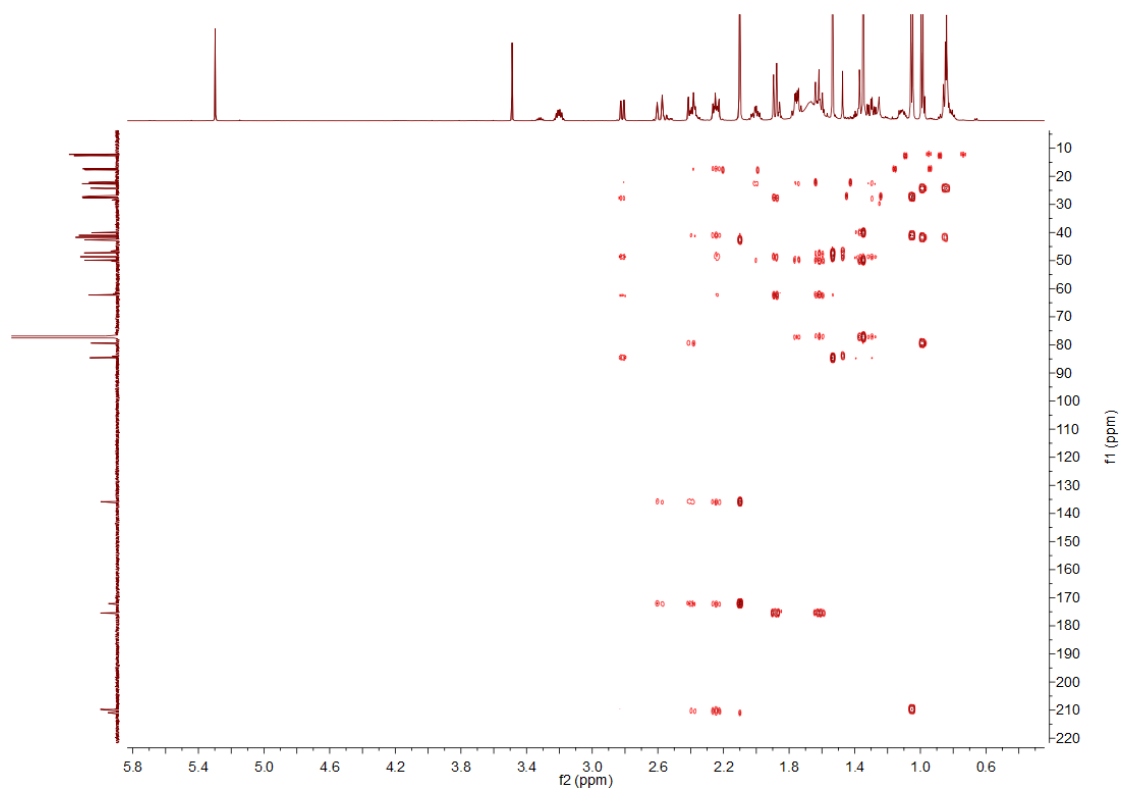

Figure S33. <sup>1</sup>H-<sup>1</sup>H COSY spectrum of compound **3** (recorded in chloroform-*d*)

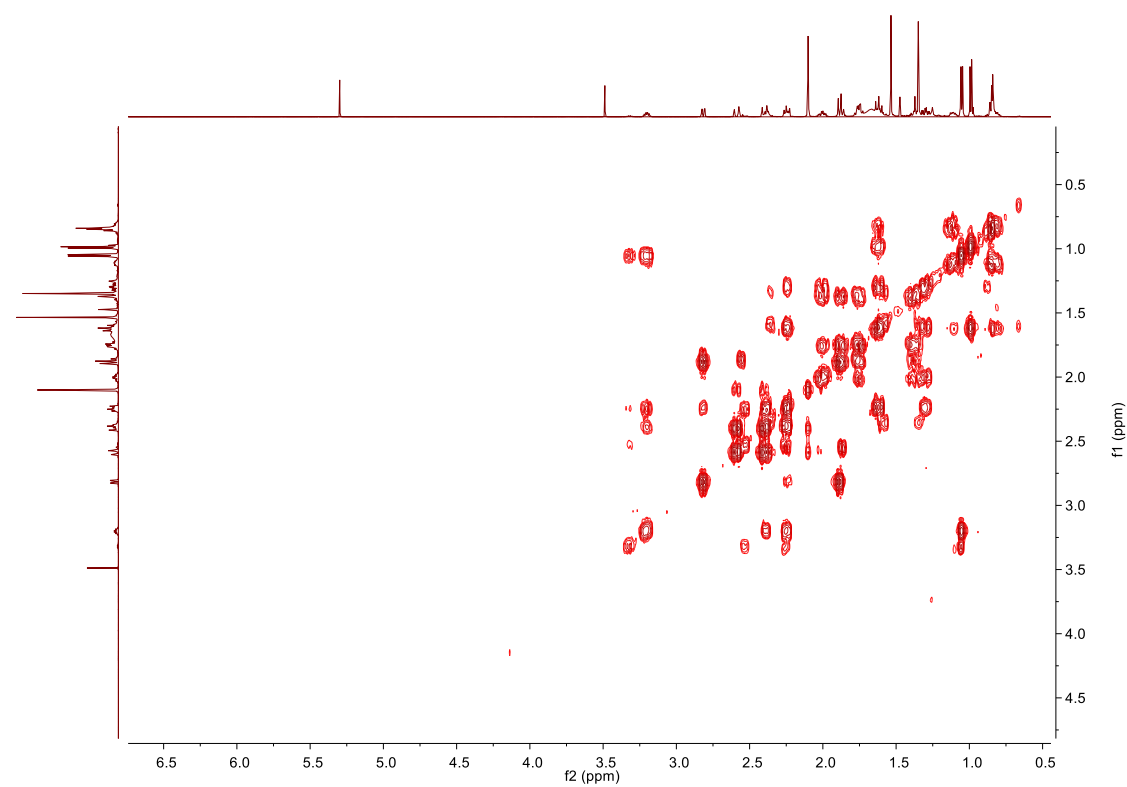

**Figure S34.** ROESY spectrum of compound **3** (recorded in chloroform-*d*)

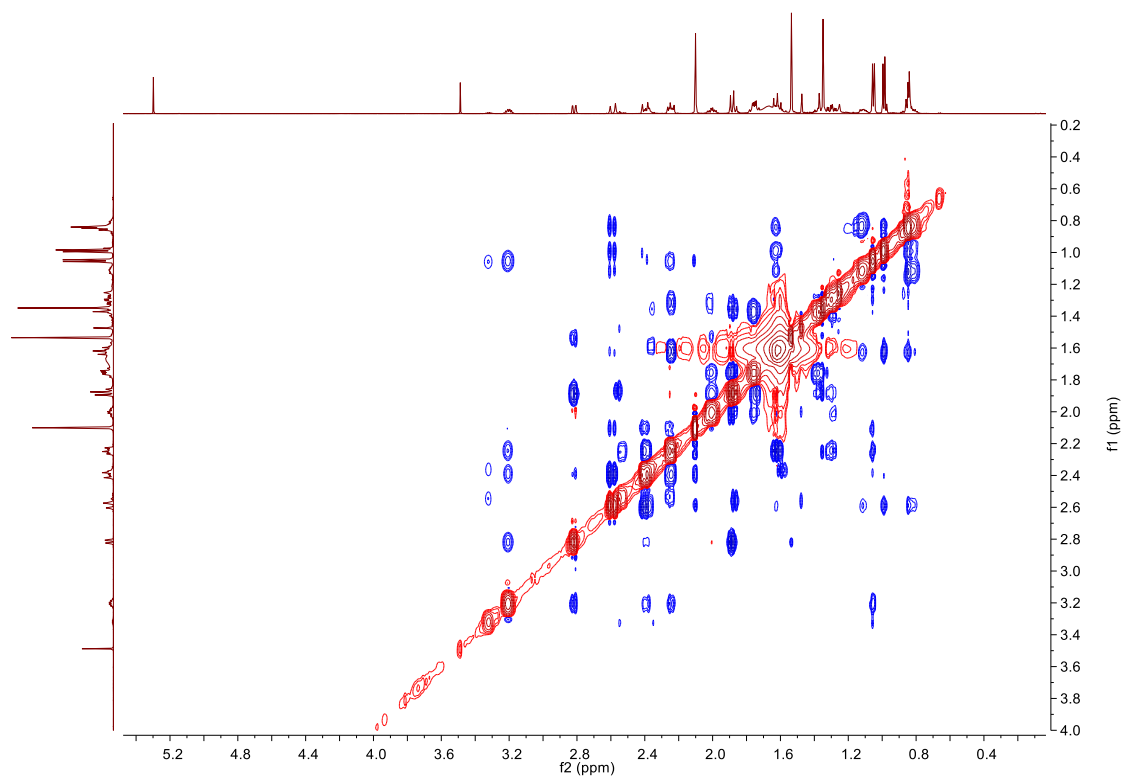

**Figure S35.** HRESIMS spectrum of compound **3**

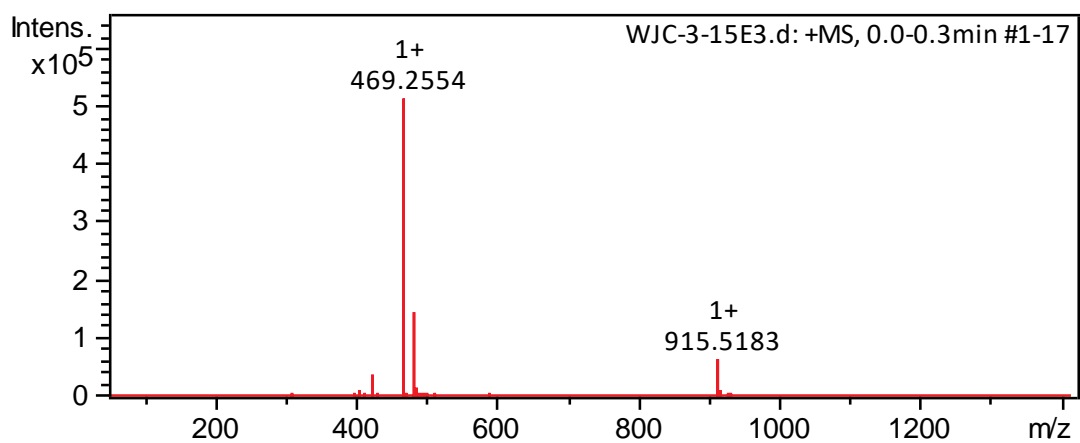

Figure S36. IR spectrum of compound 3

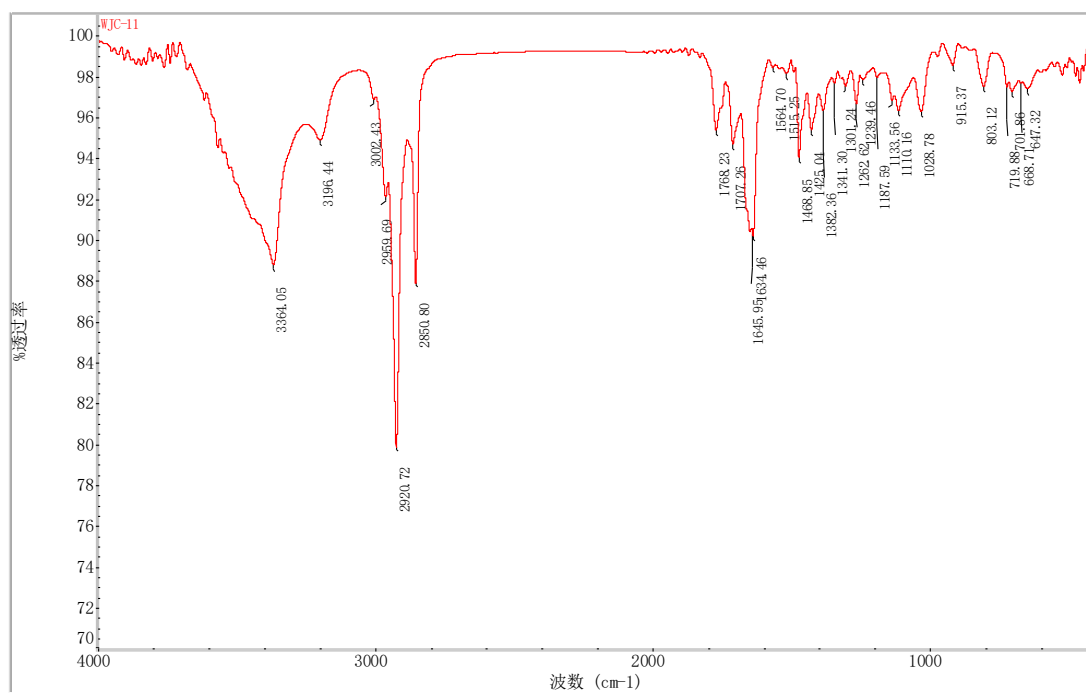

Figure S37. UV spectrum of compound 3

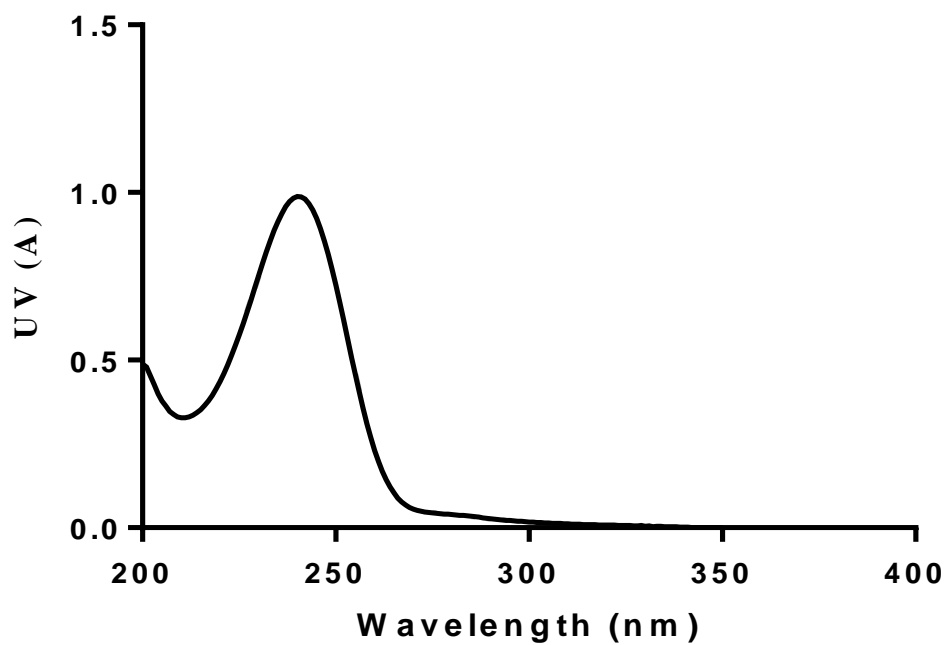

Figure S38. CD spectrum of **3** in methanol

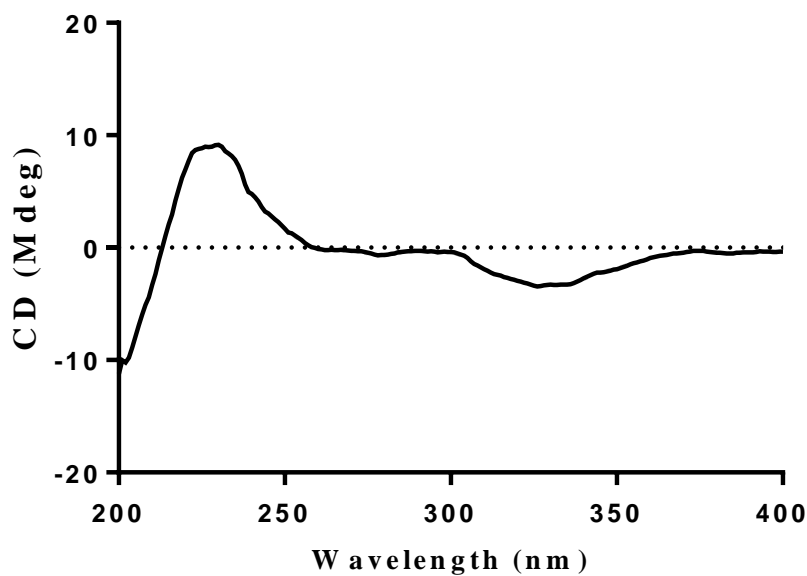

Figure S39. <sup>1</sup>H NMR spectrum of compound **4** (recorded in chloroform-*d*)

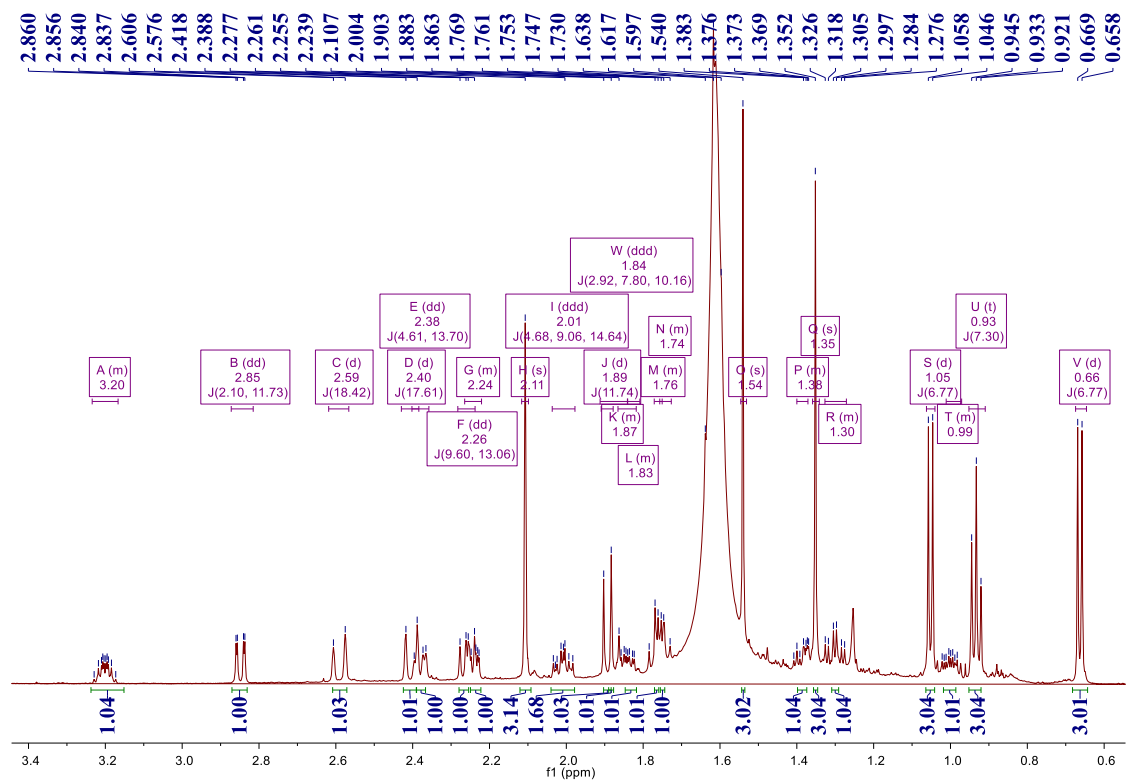

Figure S40.  $^{13}\text{C}$  NMR spectrum of compound **4** (recorded in chloroform-*d*)

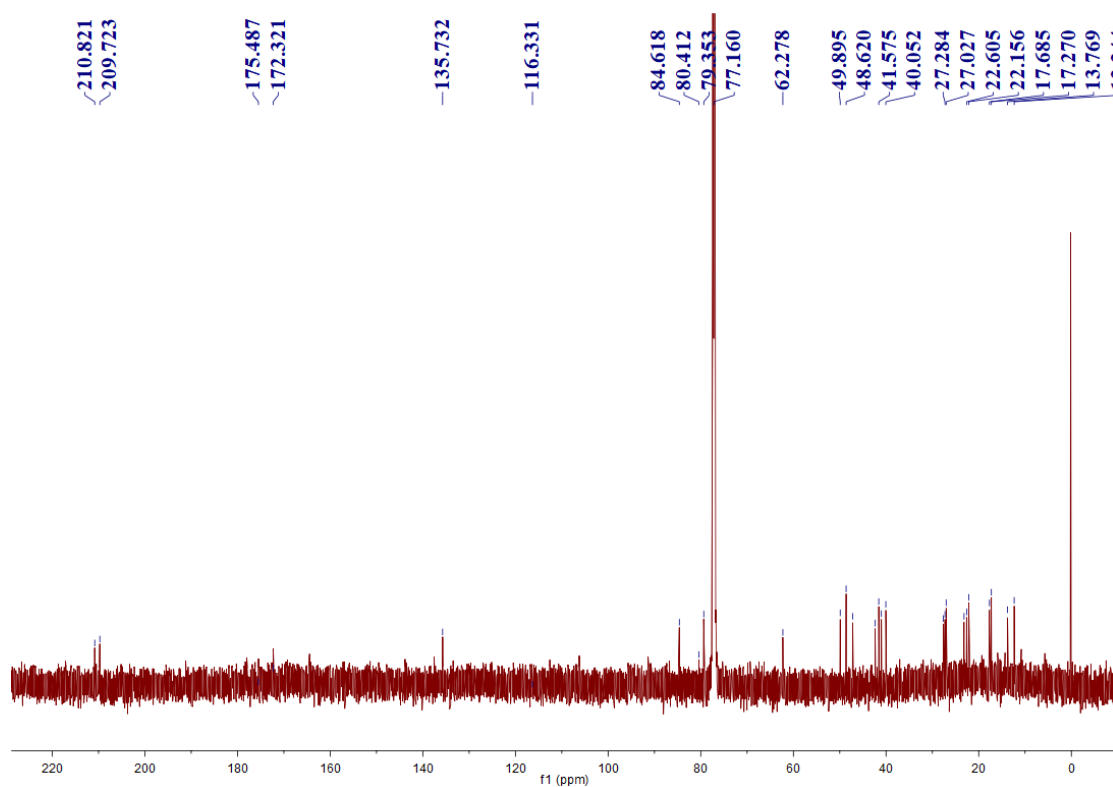

Figure S41. DEPT spectrum of compound **4** (recorded in chloroform-*d*)

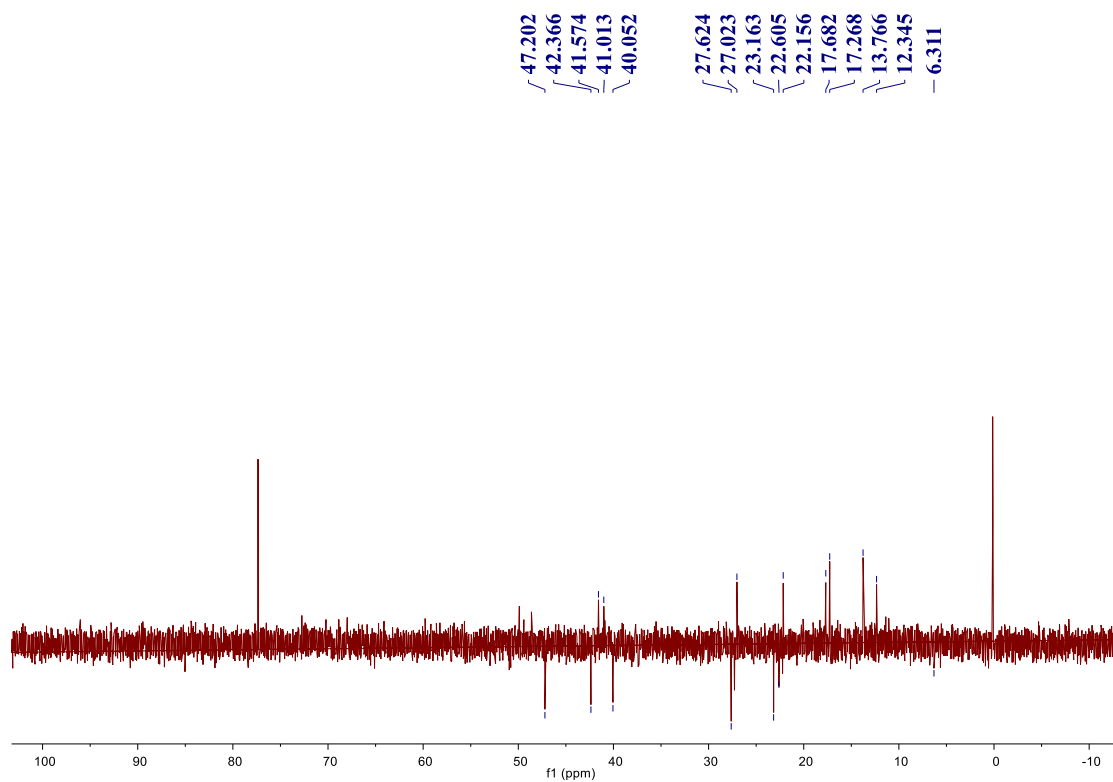

Figure S42. HSQC spectrum of compound **4** (recorded in chloroform-*d*)

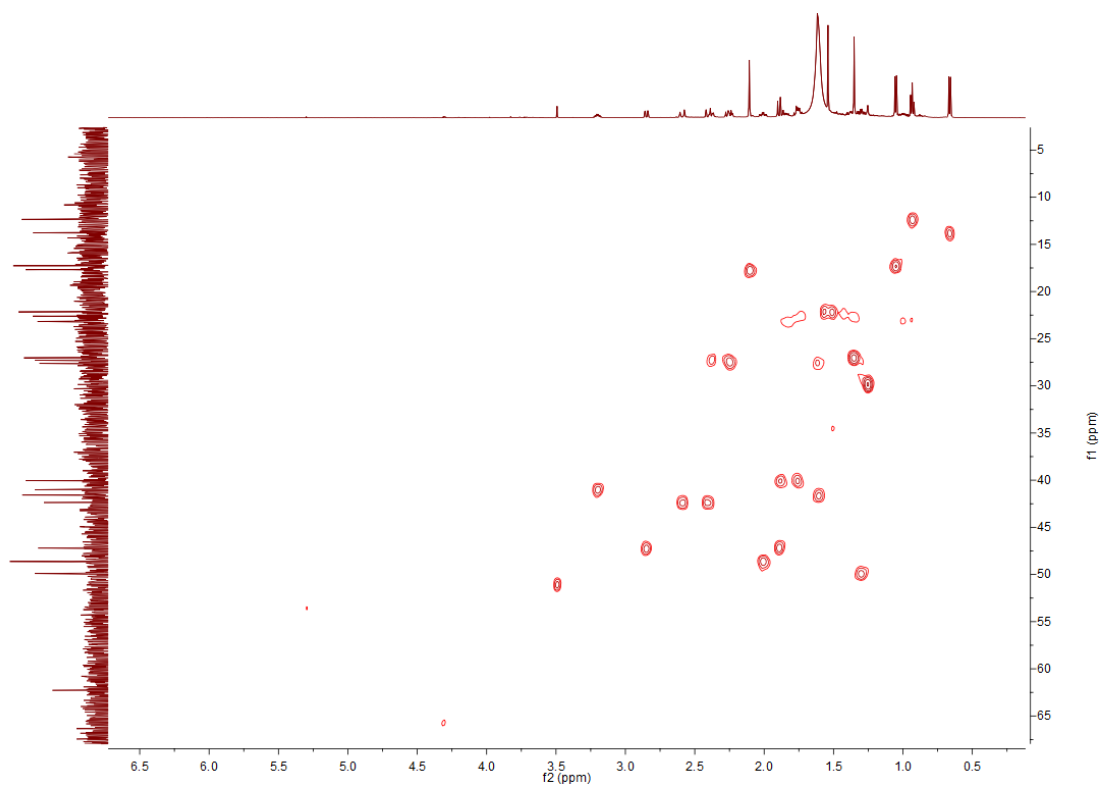

Figure S43. HMBC spectrum of compound **4** (recorded in chloroform-*d*)

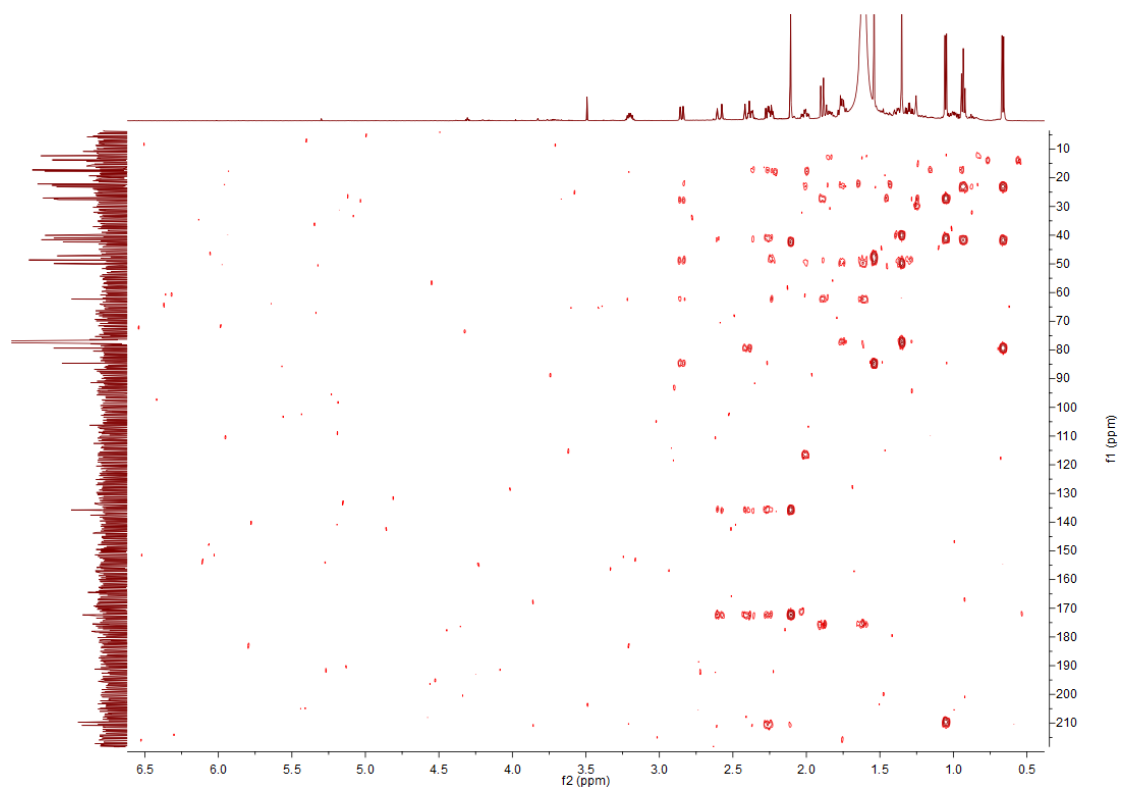



**Figure S44.**  $^1\text{H}$ - $^1\text{H}$  COSY spectrum of compound **4** (recorded in chloroform-*d*)

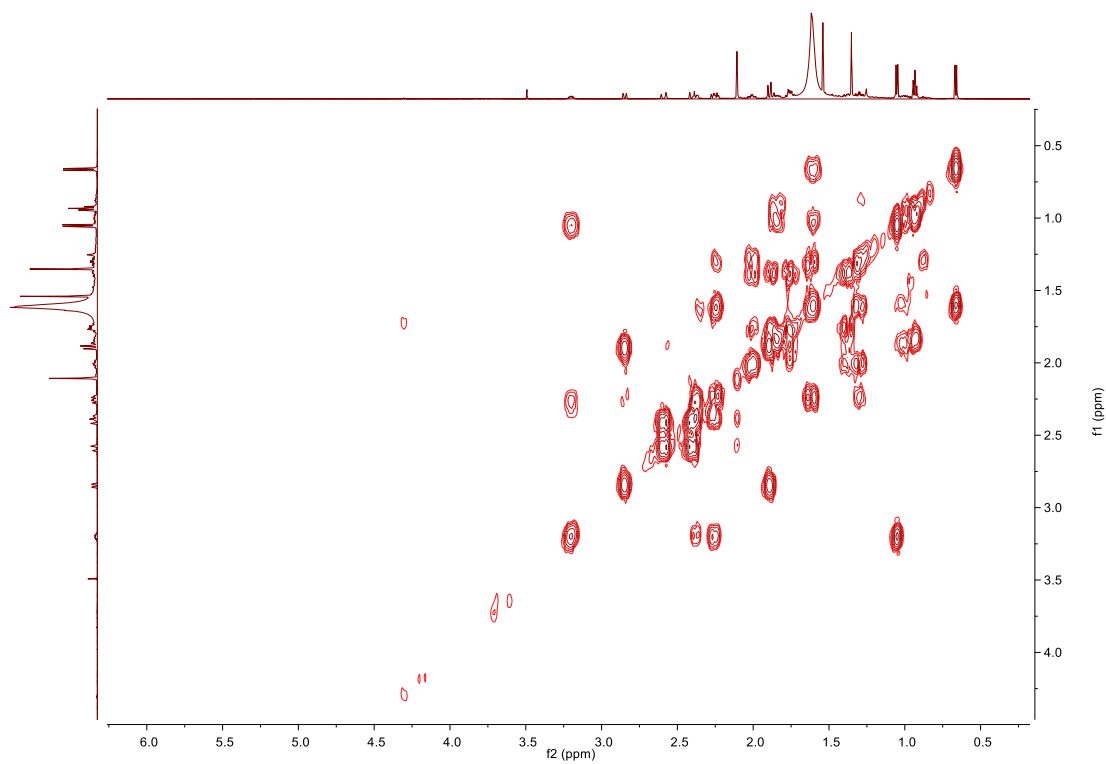

**Figure S45.** ROESY NMR spectrum of compound **4** (recorded in chloroform-*d*)

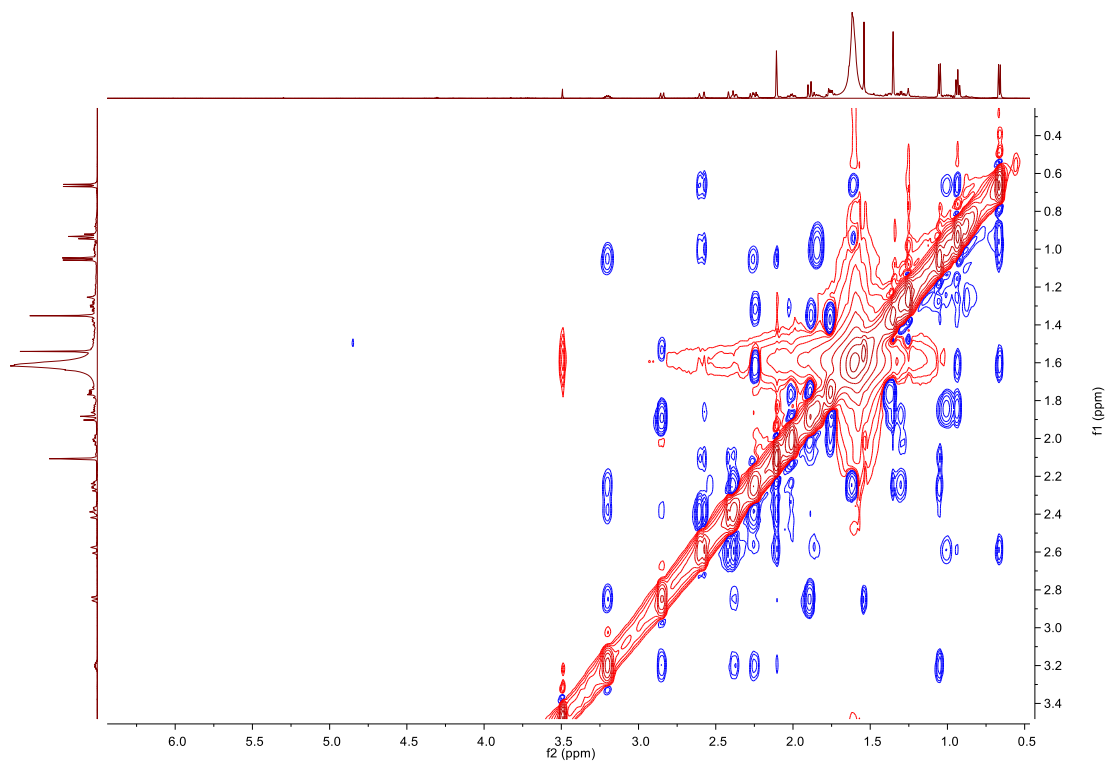

Figure S46. HRESIMS spectrum of compound 4

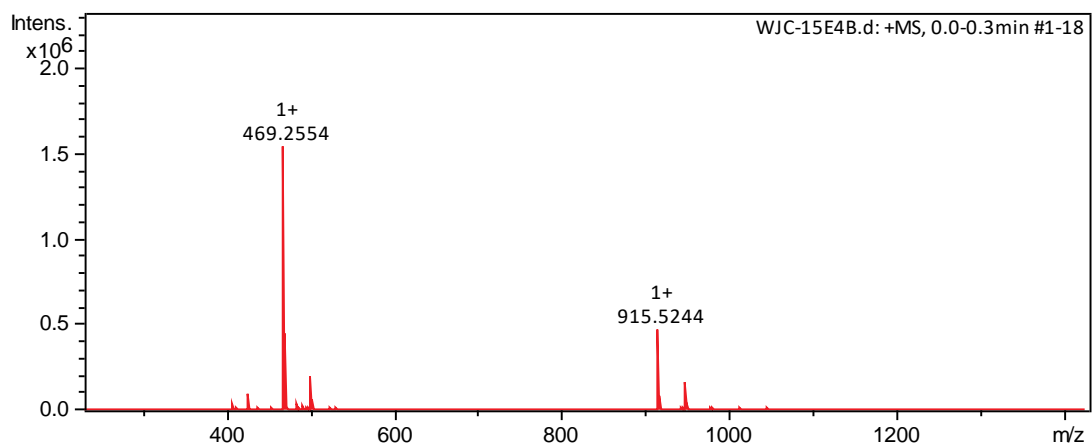

Figure S47. IR spectrum of compound 4

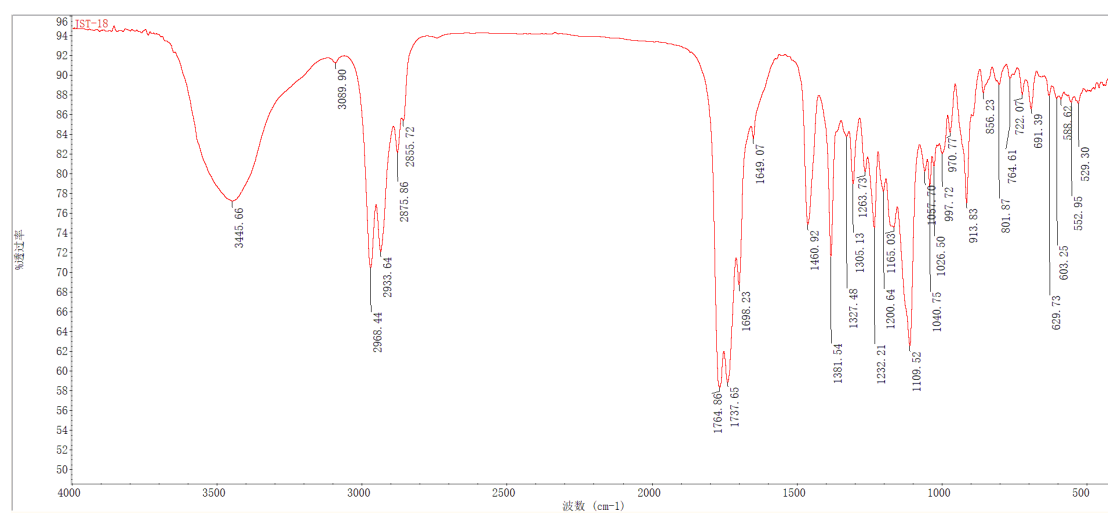

Figure S48. UV spectrum of compound 4

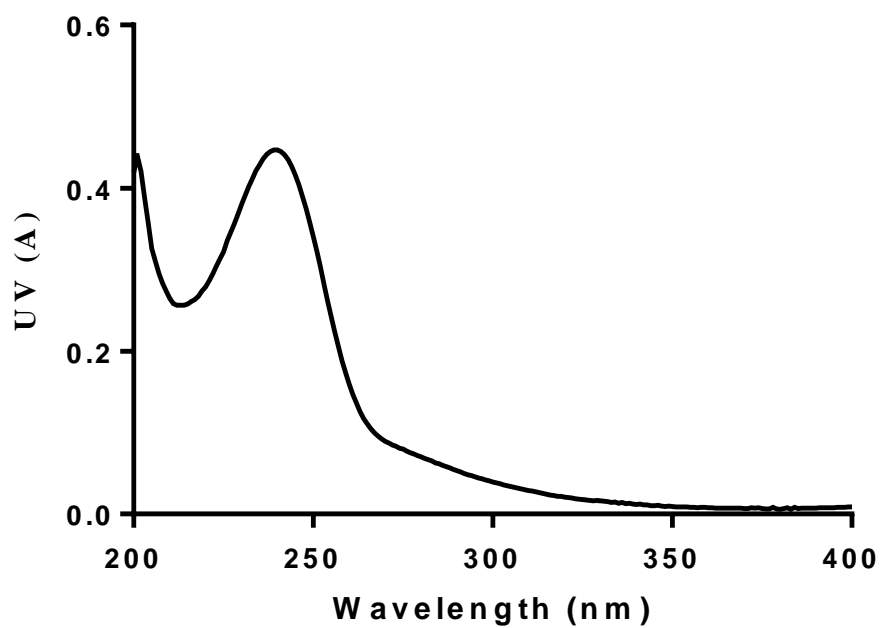

Figure S49. CD spectrum of 4 in methanol

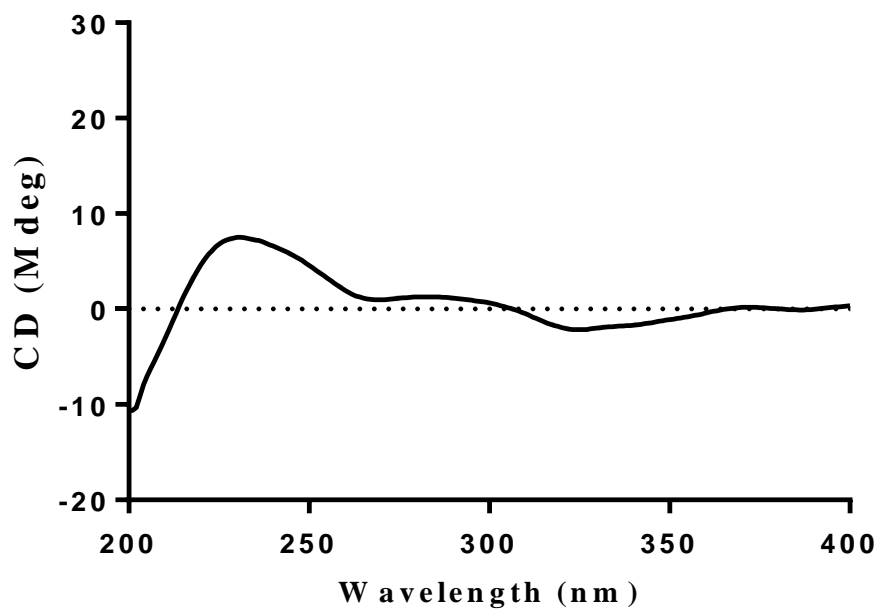

Figure S50. <sup>1</sup>H NMR spectrum of compound 5 (recorded in chloroform-*d*)

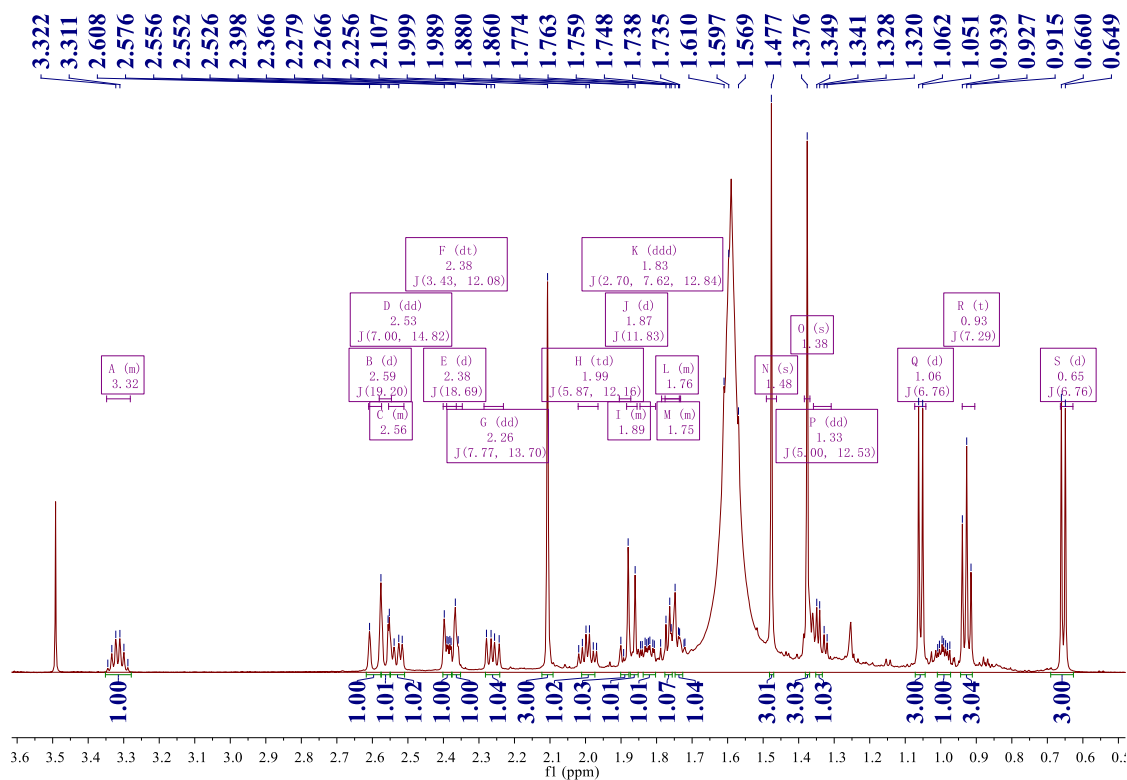

Figure S54. <sup>13</sup>C NMR spectrum of compound 5 (recorded in chloroform-*d*)

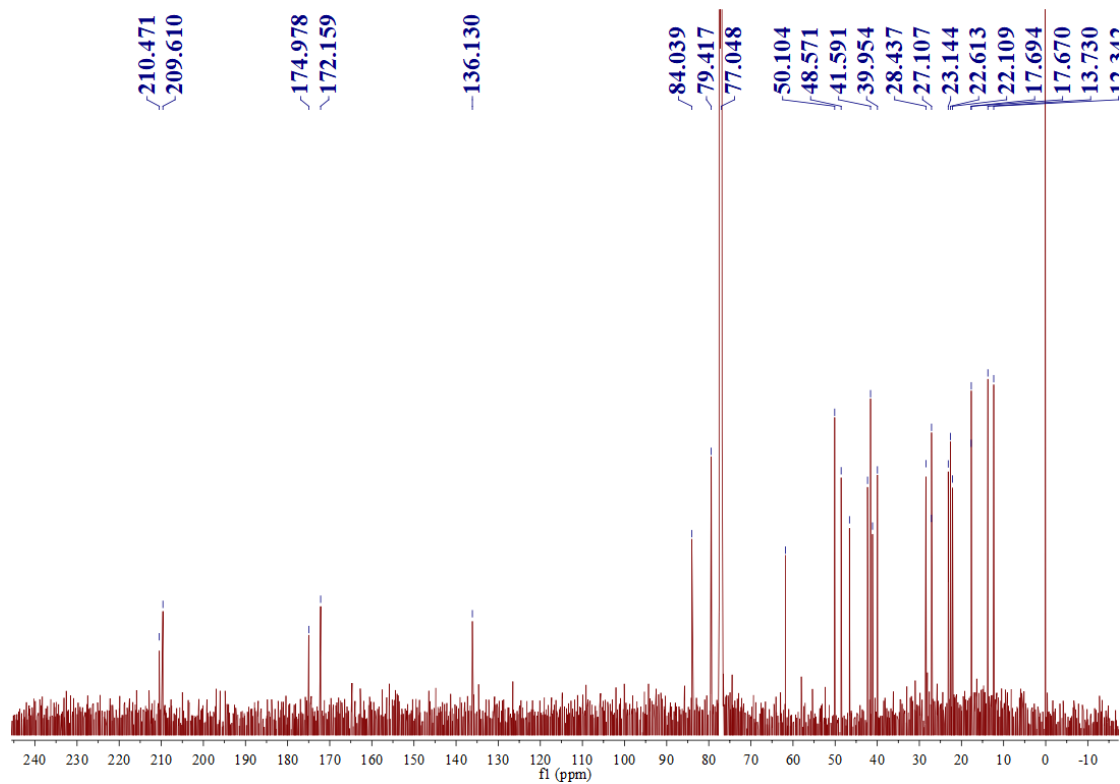

Figure S52. DEPT spectrum of compound 5 (recorded in chloroform-*d*)

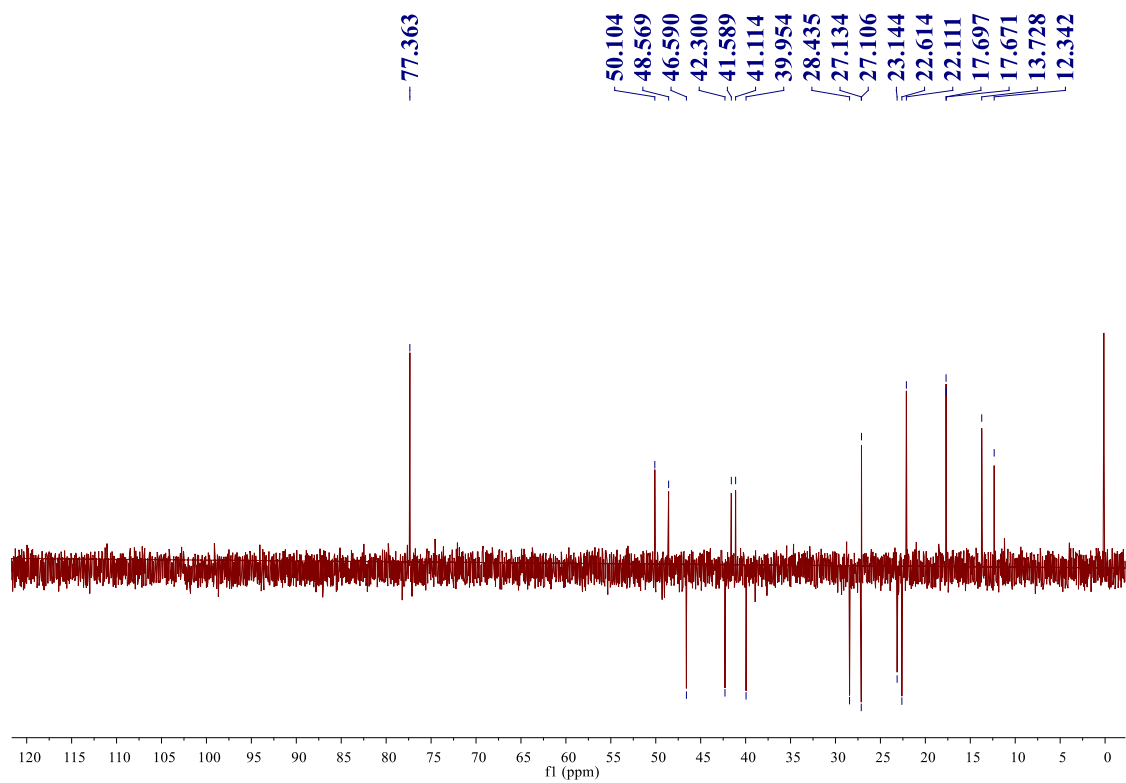

Figure S53. HSQC spectrum of compound 5 (recorded in chloroform-*d*)

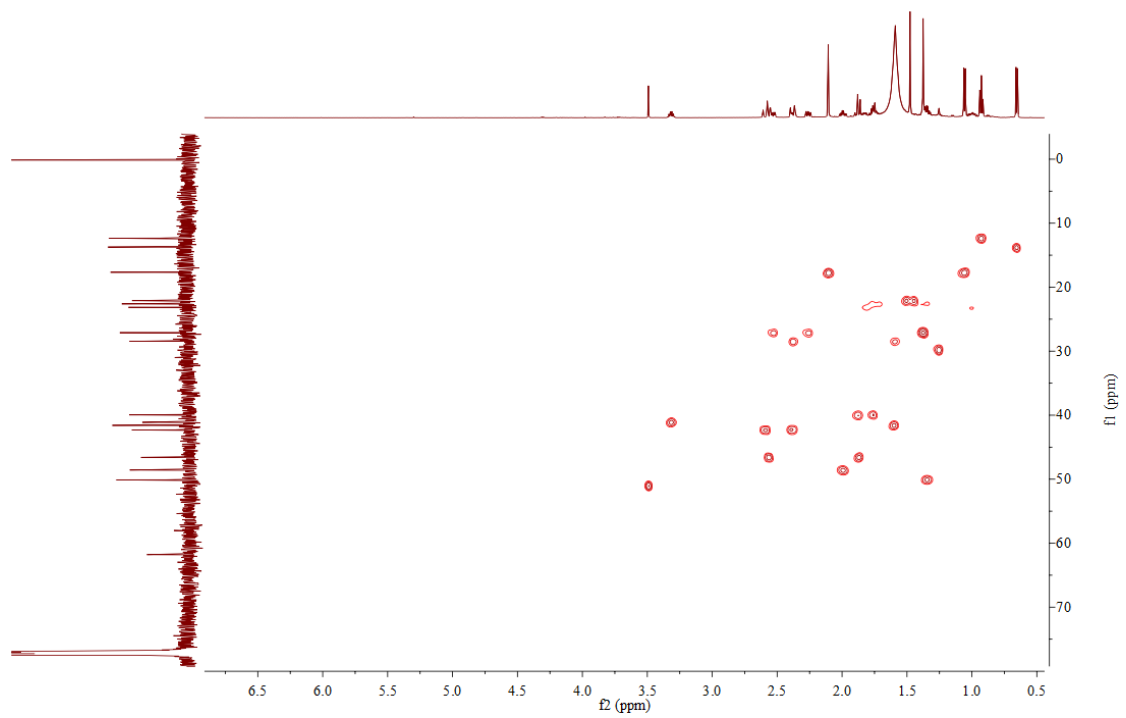

Figure S54. HMBC spectrum of compound 5 (recorded in chloroform-*d*)

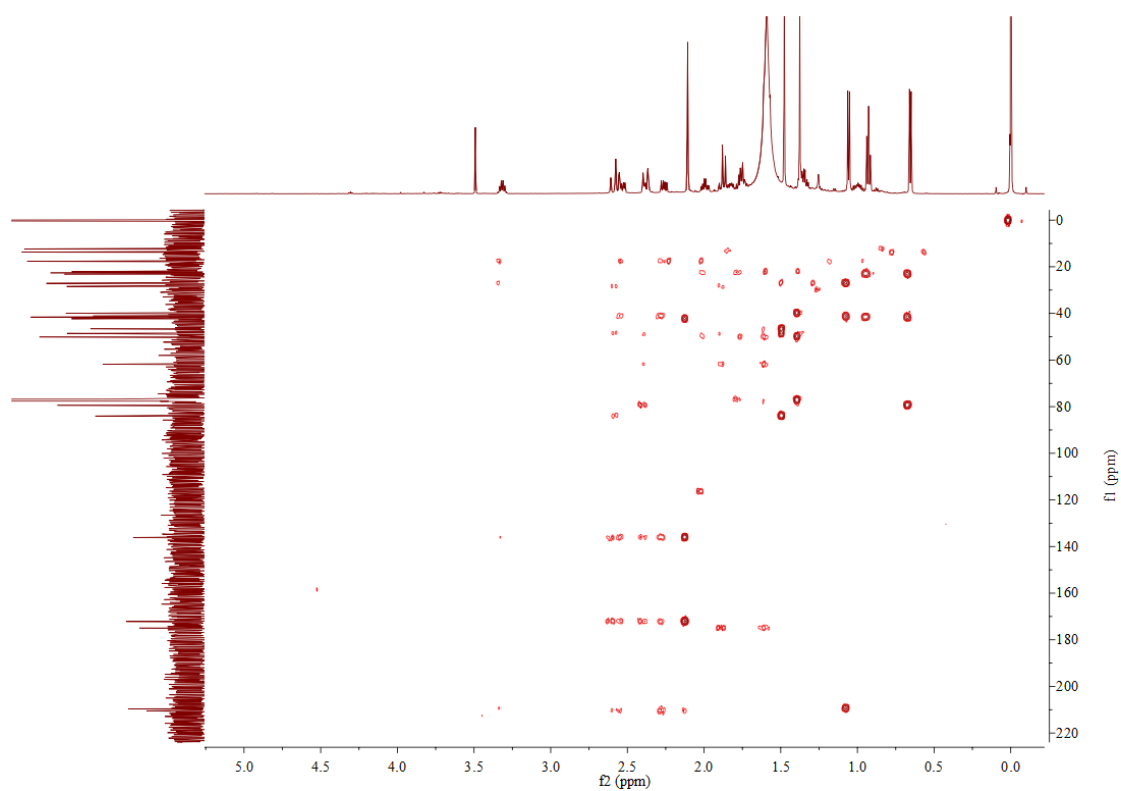

Figure S55. <sup>1</sup>H-<sup>1</sup>H COSY spectrum of compound 5 (recorded in chloroform-*d*)

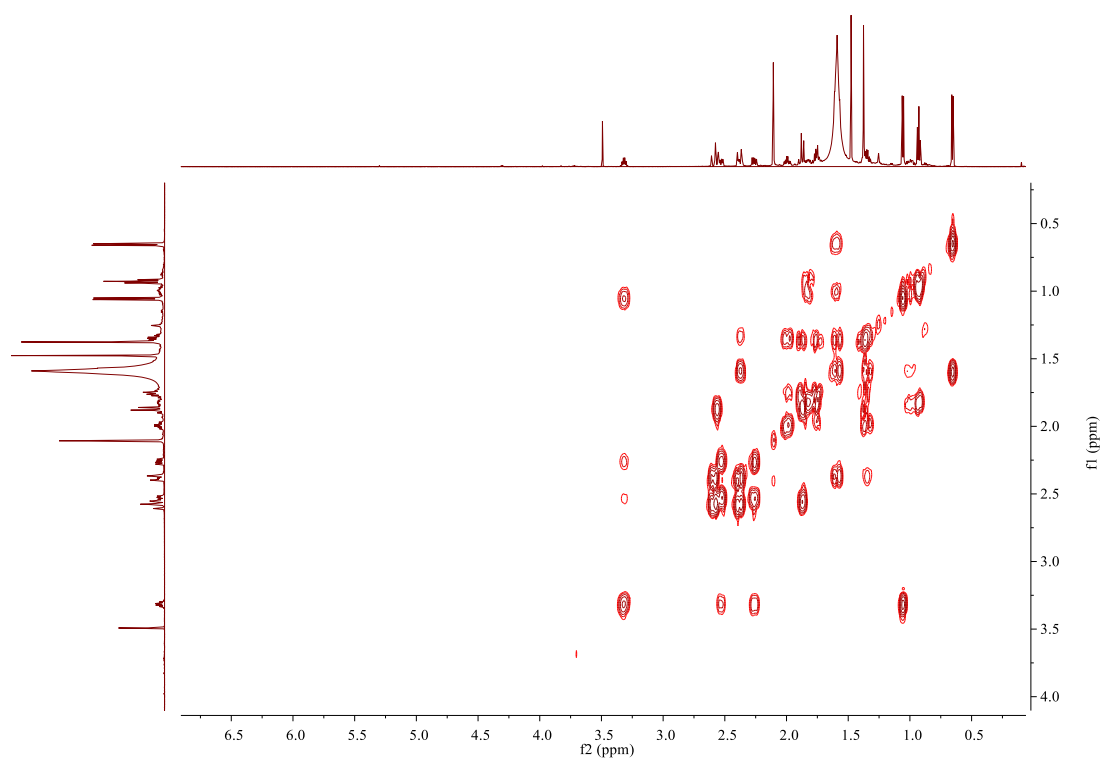

Figure S56. ROESY spectrum of compound 5 (recorded in chloroform-*d*)

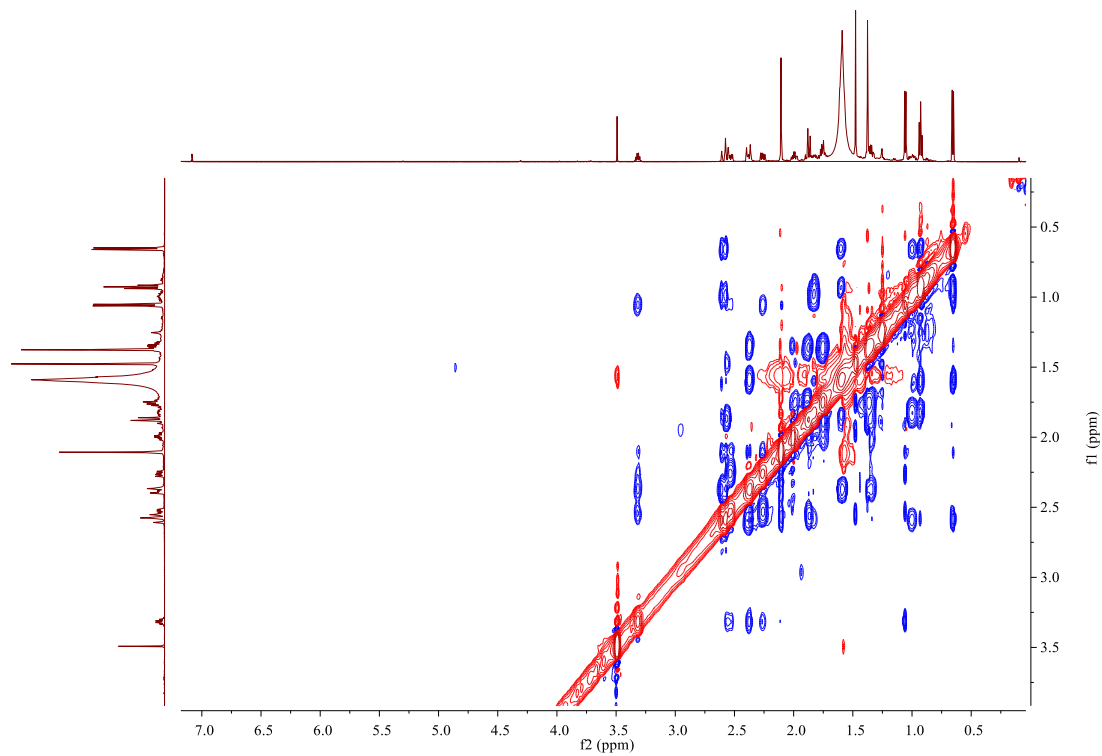

Figure S57. HRESIMS spectrum of compound 5

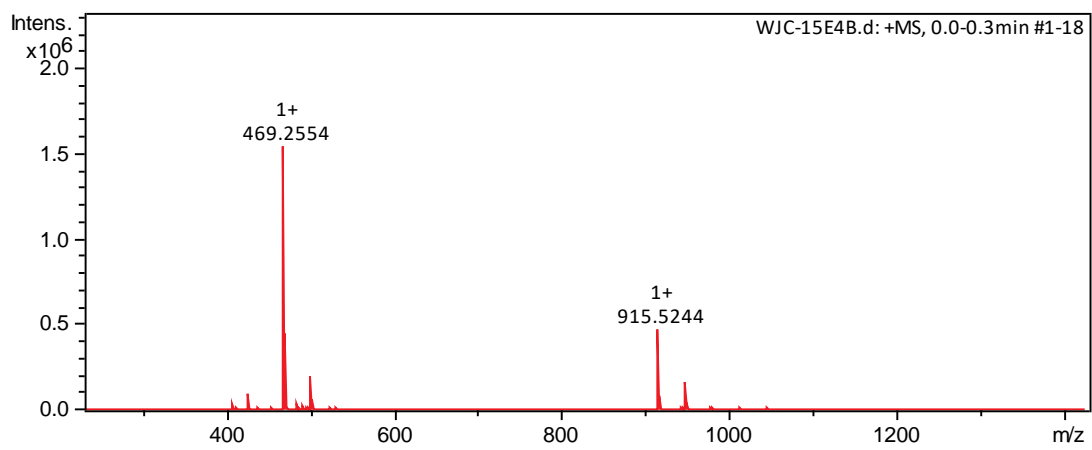

Figure S58. IR spectrum of compound 5

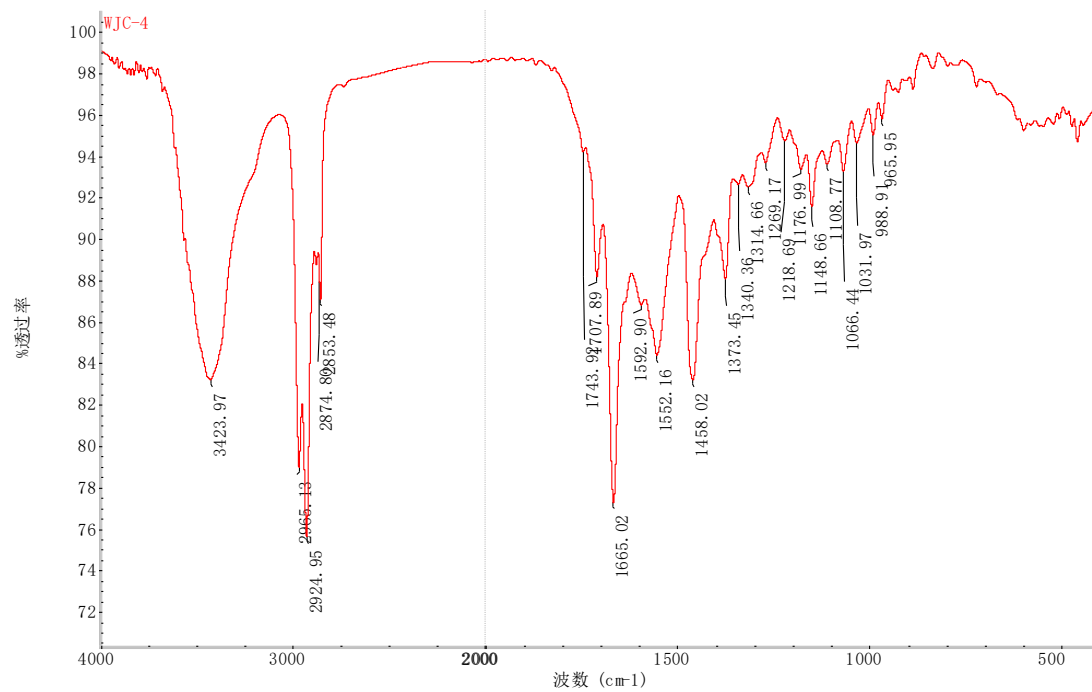

Figure S59. UV spectrum of compound 5

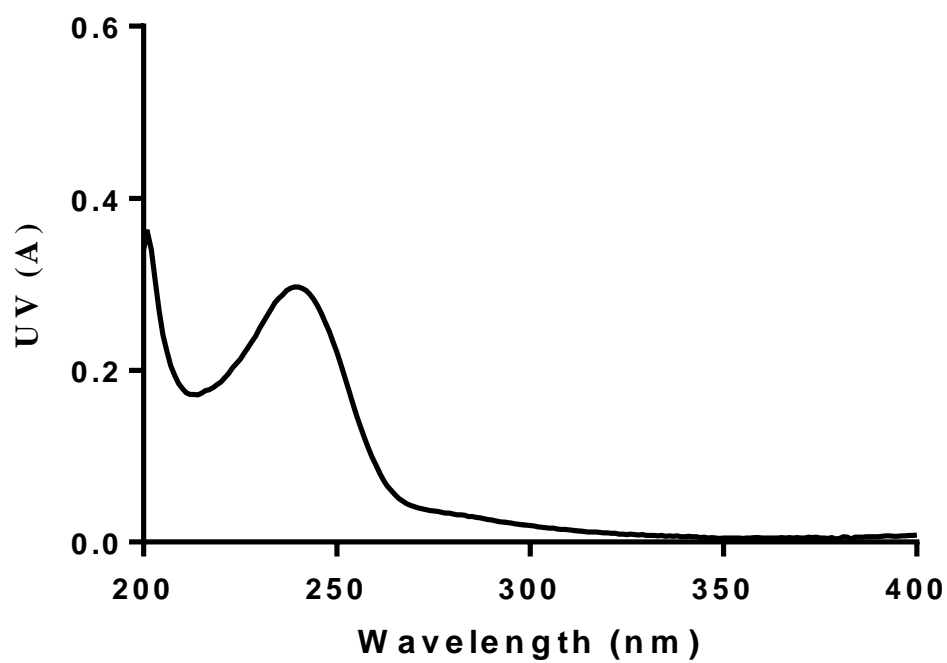



Figure S60. CD spectrum of 5 in methanol

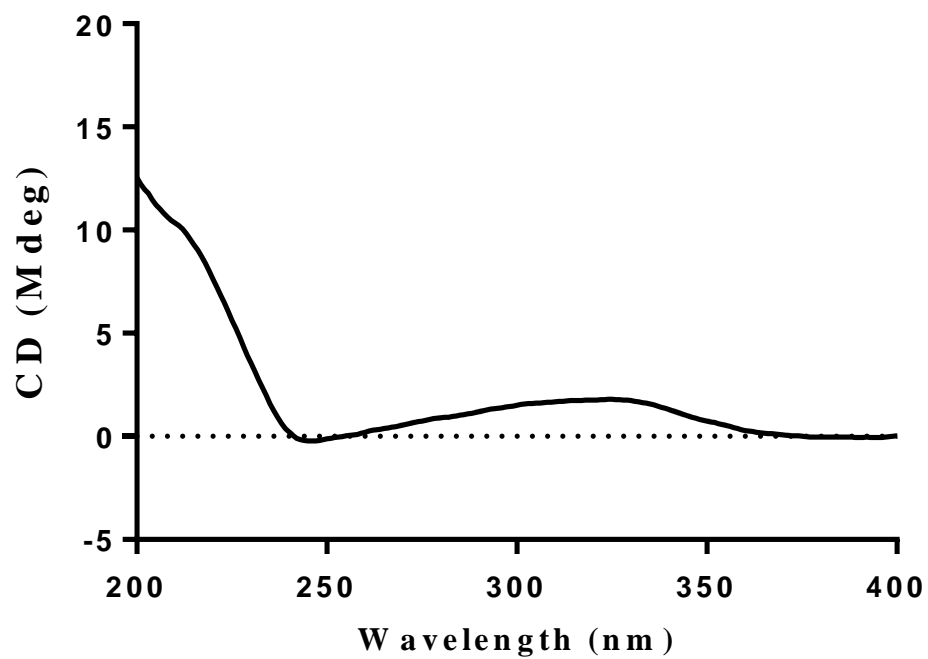

**Table S2.** Gibbs free energies<sup>a</sup> and equilibrium populations<sup>b</sup> of low-energy conformers of **3**.

| Conformers     | $\Delta G$ (a.u.) | P(%) / 100 | G (a.u.)     |
|----------------|-------------------|------------|--------------|
| <b>3-1_en_</b> | 0.00672           | 0.04       | -1464.507517 |
| <b>3-2_en_</b> | 0.00065           | 23.7       | -1464.513591 |
| <b>3-3_en_</b> | 0.00192           | 6.2        | -1464.512325 |
| <b>3-4_en_</b> | 0.00669           | 0.04       | -1464.507553 |
| <b>3-5_en_</b> | 0.00334           | 1.37       | -1464.510897 |
| <b>3-6_en_</b> | 0.00197           | 5.84       | -1464.512268 |
| <b>3-7_en_</b> | 0.00321           | 1.58       | -1464.511032 |
| <b>3-8_en_</b> | 0.00115           | 14.02      | -1464.513095 |
| <b>3-9_en_</b> | 0.0               | 47.21      | -1464.514241 |

<sup>a</sup>wB97M-V/def2-TZVP, in a.u.

<sup>b</sup>From  $\Delta G$  values at 298.15 K.

**Table S3.** Cartesian coordinates for the low-energy reoptimized random research conformers of **3** at B3LYP-D3(BJ)/6-31G\* level of theory in chloroform.

| 3-1_en_       |               | Standard Orientation (A.U.) |           |           |           |
|---------------|---------------|-----------------------------|-----------|-----------|-----------|
| Center number | Atomic number | Atomic Type                 | X         | Y         | Z         |
| 0             | 6             | C                           | 2.889858  | 0.289122  | -0.580012 |
| 1             | 6             | C                           | 0.490693  | -1.286606 | -1.23694  |
| 2             | 6             | C                           | 1.388535  | -3.765933 | -2.470462 |
| 3             | 8             | O                           | 1.593703  | -3.402098 | -4.992628 |
| 4             | 6             | C                           | 0.968739  | -0.779353 | -5.642769 |
| 5             | 6             | C                           | 3.346372  | 0.848401  | -5.34822  |
| 6             | 6             | C                           | 4.679167  | 0.298294  | -2.836561 |
| 7             | 6             | C                           | -0.857605 | -0.048528 | -3.502561 |
| 8             | 6             | C                           | 5.54155   | 0.693409  | -7.224661 |
| 9             | 6             | C                           | 7.77297   | 1.911606  | -5.74915  |
| 10            | 6             | C                           | 6.94278   | 2.12872   | -2.935139 |
| 11            | 6             | C                           | -1.150452 | -1.650614 | 1.111999  |
| 12            | 6             | C                           | -2.981593 | -3.875549 | 1.309984  |
| 13            | 8             | O                           | -0.859882 | -0.240597 | 2.901585  |
| 14            | 6             | C                           | -0.167389 | -0.767926 | -8.266873 |
| 15            | 8             | O                           | 1.920734  | -5.723137 | -1.453313 |
| 16            | 1             | H                           | 5.508406  | -1.610433 | -2.993071 |
| 17            | 6             | C                           | 9.033592  | 1.507394  | -1.052306 |
| 18            | 8             | O                           | 6.116245  | 4.678743  | -2.587655 |
| 19            | 1             | H                           | 2.702862  | 2.828373  | -5.282803 |
| 20            | 6             | C                           | -4.702304 | -3.541068 | 3.624841  |
| 21            | 6             | C                           | -4.437938 | -4.662126 | -1.070322 |
| 22            | 6             | C                           | -6.469183 | -1.300707 | 3.614502  |
| 23            | 6             | C                           | -8.434173 | -0.921097 | 5.229478  |
| 24            | 6             | C                           | -9.814715 | 1.53058   | 4.741516  |
| 25            | 6             | C                           | -8.029373 | 3.003881  | 2.977933  |
| 26            | 6             | C                           | -6.430594 | 0.859193  | 1.858613  |
| 27            | 6             | C                           | -9.281568 | -2.638496 | 7.295499  |
| 28            | 8             | O                           | -5.481509 | 1.023093  | -0.23986  |
| 29            | 6             | C                           | -6.333555 | 4.854739  | 4.544556  |
| 30            | 8             | O                           | -9.325319 | 4.263768  | 1.022259  |
| 31            | 6             | C                           | -3.802666 | 5.583406  | 3.290876  |
| 32            | 6             | C                           | -7.876781 | 7.186216  | 5.294734  |
| 33            | 6             | C                           | -3.940007 | 6.943007  | 0.741118  |
| 34            | 1             | H                           | 3.793715  | -0.50943  | 1.112277  |
| 35            | 1             | H                           | 2.257232  | 2.210581  | -0.099761 |
| 36            | 1             | H                           | -2.735405 | -0.856801 | -3.819167 |

|    |   |   |            |           |           |
|----|---|---|------------|-----------|-----------|
| 37 | 1 | H | -1.077857  | 1.999869  | -3.275659 |
| 38 | 1 | H | 5.946099   | -1.301467 | -7.661719 |
| 39 | 1 | H | 5.15333    | 1.665916  | -9.019189 |
| 40 | 1 | H | 8.205249   | 3.824362  | -6.431154 |
| 41 | 1 | H | 9.507009   | 0.779823  | -5.919157 |
| 42 | 1 | H | -1.677928  | -5.452043 | 1.744868  |
| 43 | 1 | H | 1.192437   | -1.486536 | -9.66391  |
| 44 | 1 | H | -1.873064  | -1.954708 | -8.331077 |
| 45 | 1 | H | -0.688019  | 1.175131  | -8.796492 |
| 46 | 1 | H | 8.349239   | 1.701753  | 0.907718  |
| 47 | 1 | H | 9.709925   | -0.445103 | -1.291554 |
| 48 | 1 | H | 10.63875   | 2.806106  | -1.304013 |
| 49 | 1 | H | 5.62731    | 4.87962   | -0.839163 |
| 50 | 1 | H | -5.802589  | -5.292068 | 3.869187  |
| 51 | 1 | H | -3.491316  | -3.364901 | 5.3078    |
| 52 | 1 | H | -3.184228  | -5.074886 | -2.670865 |
| 53 | 1 | H | -5.785787  | -3.195463 | -1.646144 |
| 54 | 1 | H | -5.492872  | -6.411221 | -0.676166 |
| 55 | 1 | H | -11.611393 | 1.179815  | 3.7452    |
| 56 | 1 | H | -10.276172 | 2.524929  | 6.510772  |
| 57 | 1 | H | -11.307584 | -3.087546 | 7.091304  |
| 58 | 1 | H | -8.208295  | -4.412389 | 7.369589  |
| 59 | 1 | H | -9.081324  | -1.678834 | 9.138261  |
| 60 | 1 | H | -5.825298  | 3.816569  | 6.281441  |
| 61 | 1 | H | -8.306328  | 4.026522  | -0.485305 |
| 62 | 1 | H | -2.802623  | 6.811536  | 4.650131  |
| 63 | 1 | H | -2.616643  | 3.885407  | 3.100567  |
| 64 | 1 | H | -6.72083   | 8.485753  | 6.437414  |
| 65 | 1 | H | -9.555398  | 6.679837  | 6.414846  |
| 66 | 1 | H | -8.546807  | 8.198574  | 3.611085  |
| 67 | 1 | H | -5.177243  | 8.61471   | 0.800472  |
| 68 | 1 | H | -2.044838  | 7.59385   | 0.172852  |
| 69 | 1 | H | -4.623564  | 5.679514  | -0.759222 |

| 3-2_en_       |               | Standard Orientation (A.U.) |           |           |           |
|---------------|---------------|-----------------------------|-----------|-----------|-----------|
| Center number | Atomic number | Atomic Type                 | X         | Y         | Z         |
| 0             | 6             | C                           | 1.490204  | 0.227054  | -0.027526 |
| 1             | 6             | C                           | 1.590495  | 2.309207  | -2.124549 |
| 2             | 6             | C                           | 0.170287  | 1.292069  | -4.468718 |
| 3             | 8             | O                           | 1.830635  | 0.040334  | -5.940621 |
| 4             | 6             | C                           | 4.345964  | 0.020626  | -4.761913 |
| 5             | 6             | C                           | 4.482337  | -2.210081 | -2.910393 |
| 6             | 6             | C                           | 2.126634  | -2.308362 | -1.225232 |
| 7             | 6             | C                           | 4.27297   | 2.464988  | -3.192547 |
| 8             | 6             | C                           | 4.648586  | -4.946547 | -3.843185 |
| 9             | 6             | C                           | 3.762258  | -6.523564 | -1.520195 |
| 10            | 6             | C                           | 2.636104  | -4.618281 | 0.441409  |
| 11            | 6             | C                           | 0.520521  | 4.7957    | -1.134586 |
| 12            | 6             | C                           | -2.258634 | 4.803344  | -0.380572 |
| 13            | 8             | O                           | 1.843722  | 6.651037  | -0.916297 |
| 14            | 6             | C                           | 6.294935  | -0.051346 | -6.852047 |
| 15            | 8             | O                           | -2.036071 | 1.474216  | -4.987056 |
| 16            | 1             | H                           | 0.52535   | -2.862636 | -2.443332 |
| 17            | 6             | C                           | 0.303984  | -5.595373 | 1.823332  |
| 18            | 8             | O                           | 4.521107  | -3.855631 | 2.21785   |
| 19            | 1             | H                           | 6.115974  | -1.849629 | -1.671474 |
| 20            | 6             | C                           | -2.566542 | 5.162901  | 2.522744  |
| 21            | 6             | C                           | -3.686265 | 6.822211  | -1.880198 |
| 22            | 6             | C                           | -4.935667 | 3.862888  | 3.343424  |
| 23            | 6             | C                           | -7.329245 | 4.716744  | 3.6886    |
| 24            | 6             | C                           | -9.145092 | 2.585856  | 4.297911  |
| 25            | 6             | C                           | -7.662491 | 0.160727  | 3.640078  |
| 26            | 6             | C                           | -4.939171 | 1.120226  | 3.802118  |
| 27            | 6             | C                           | -8.23929  | 7.378472  | 3.545271  |
| 28            | 8             | O                           | -3.137984 | -0.230276 | 4.302772  |
| 29            | 6             | C                           | -8.215686 | -0.730633 | 0.868939  |
| 30            | 8             | O                           | -8.052051 | -1.817547 | 5.375925  |
| 31            | 6             | C                           | -6.35945  | -2.79389  | -0.013746 |
| 32            | 6             | C                           | -10.95299 | -1.65112  | 0.655093  |
| 33            | 6             | C                           | -6.35158  | -3.238195 | -2.869287 |
| 34            | 1             | H                           | -0.366071 | 0.163614  | 0.888981  |
| 35            | 1             | H                           | 2.886324  | 0.704677  | 1.435956  |
| 36            | 1             | H                           | 4.484088  | 4.141583  | -4.402825 |
| 37            | 1             | H                           | 5.734958  | 2.527006  | -1.723853 |
| 38            | 1             | H                           | 3.348103  | -5.216094 | -5.44585  |
| 39            | 1             | H                           | 6.552755  | -5.473749 | -4.485674 |

|    |   |   |            |           |           |
|----|---|---|------------|-----------|-----------|
| 40 | 1 | H | 5.341678   | -7.544891 | -0.633707 |
| 41 | 1 | H | 2.344976   | -7.941447 | -2.070487 |
| 42 | 1 | H | -3.052546  | 2.958051  | -0.890606 |
| 43 | 1 | H | 6.101197   | 1.603715  | -8.094788 |
| 44 | 1 | H | 8.20509    | -0.045814 | -6.028093 |
| 45 | 1 | H | 6.081965   | -1.76941  | -8.001154 |
| 46 | 1 | H | -1.193102  | -6.124411 | 0.47986   |
| 47 | 1 | H | 0.770144   | -7.291081 | 2.945289  |
| 48 | 1 | H | -0.45292   | -4.142707 | 3.102733  |
| 49 | 1 | H | 4.829695   | -5.252286 | 3.351215  |
| 50 | 1 | H | -0.9711    | 4.283829  | 3.528368  |
| 51 | 1 | H | -2.547906  | 7.186991  | 2.992454  |
| 52 | 1 | H | -5.685282  | 6.869205  | -1.308919 |
| 53 | 1 | H | -3.617044  | 6.402807  | -3.913945 |
| 54 | 1 | H | -2.847119  | 8.696207  | -1.549851 |
| 55 | 1 | H | -9.607576  | 2.556034  | 6.329827  |
| 56 | 1 | H | -10.937674 | 2.797069  | 3.266438  |
| 57 | 1 | H | -9.669561  | 7.568469  | 2.038026  |
| 58 | 1 | H | -9.187638  | 7.92229   | 5.321355  |
| 59 | 1 | H | -6.708077  | 8.727009  | 3.167869  |
| 60 | 1 | H | -7.950881  | 0.937132  | -0.359898 |
| 61 | 1 | H | -6.407998  | -2.600267 | 5.613082  |
| 62 | 1 | H | -4.427281  | -2.302841 | 0.564815  |
| 63 | 1 | H | -6.814539  | -4.563999 | 0.992456  |
| 64 | 1 | H | -11.284331 | -3.17922  | 2.025492  |
| 65 | 1 | H | -11.347181 | -2.37826  | -1.250972 |
| 66 | 1 | H | -12.330788 | -0.141416 | 1.034259  |
| 67 | 1 | H | -5.739837  | -1.53162  | -3.892073 |
| 68 | 1 | H | -5.020004  | -4.759909 | -3.367735 |
| 69 | 1 | H | -8.220873  | -3.797882 | -3.592816 |

| 3-3_en_       |               | Standard Orientation (A.U.) |            |           |           |
|---------------|---------------|-----------------------------|------------|-----------|-----------|
| Center number | Atomic number | Atomic Type                 | X          | Y         | Z         |
| 0             | 6             | C                           | 2.618385   | -0.923202 | -0.300467 |
| 1             | 6             | C                           | 0.665493   | 0.209711  | -2.197357 |
| 2             | 6             | C                           | 0.879793   | -1.317014 | -4.684724 |
| 3             | 8             | O                           | 2.64355    | -0.206328 | -6.166682 |
| 4             | 6             | C                           | 3.744054   | 1.985801  | -4.88379  |
| 5             | 6             | C                           | 5.92755    | 1.075515  | -3.197664 |
| 6             | 6             | C                           | 5.146349   | -1.242486 | -1.643611 |
| 7             | 6             | C                           | 1.579548   | 2.791124  | -3.124355 |
| 8             | 6             | C                           | 8.45561    | 0.2074    | -4.305815 |
| 9             | 6             | C                           | 9.668359   | -1.337867 | -2.116834 |
| 10            | 6             | C                           | 7.549349   | -1.847122 | -0.115677 |
| 11            | 6             | C                           | -2.063309  | 0.20769   | -1.24379  |
| 12            | 6             | C                           | -3.143423  | -2.237724 | -0.1823   |
| 13            | 8             | O                           | -3.310254  | 2.13034   | -1.354022 |
| 14            | 6             | C                           | 4.491869   | 3.89546   | -6.875643 |
| 15            | 8             | O                           | -0.24055   | -3.194793 | -5.27847  |
| 16            | 1             | H                           | 4.947608   | -2.810903 | -3.003852 |
| 17            | 6             | C                           | 7.588787   | -4.511615 | 0.959542  |
| 18            | 8             | O                           | 7.777771   | -0.20751  | 2.015442  |
| 19            | 1             | H                           | 6.295627   | 2.66039   | -1.884245 |
| 20            | 6             | C                           | -3.135881  | -2.121837 | 2.763517  |
| 21            | 6             | C                           | -5.773256  | -2.721896 | -1.28662  |
| 22            | 6             | C                           | -4.716556  | -0.035842 | 3.823906  |
| 23            | 6             | C                           | -4.042892  | 2.324365  | 4.55851   |
| 24            | 6             | C                           | -6.280873  | 3.838177  | 5.490479  |
| 25            | 6             | C                           | -8.603037  | 2.32063   | 4.592178  |
| 26            | 6             | C                           | -7.447852  | -0.321758 | 4.253578  |
| 27            | 6             | C                           | -1.473466  | 3.475445  | 4.493724  |
| 28            | 8             | O                           | -8.658754  | -2.271026 | 4.436686  |
| 29            | 6             | C                           | -9.589482  | 3.332306  | 1.995024  |
| 30            | 8             | O                           | -10.560964 | 2.225675  | 6.393265  |
| 31            | 6             | C                           | -11.59426  | 1.570166  | 0.832137  |
| 32            | 6             | C                           | -10.654675 | 6.008295  | 2.309974  |
| 33            | 6             | C                           | -12.107004 | 2.079992  | -1.965322 |
| 34            | 1             | H                           | 1.957634   | -2.750197 | 0.431956  |
| 35            | 1             | H                           | 2.830244   | 0.371227  | 1.313967  |
| 36            | 1             | H                           | 0.068584   | 3.749581  | -4.17723  |
| 37            | 1             | H                           | 2.201934   | 4.044247  | -1.590848 |
| 38            | 1             | H                           | 8.096305   | -1.010461 | -5.954407 |
| 39            | 1             | H                           | 9.658119   | 1.77856   | -4.940385 |

|    |   |   |            |           |           |
|----|---|---|------------|-----------|-----------|
| 40 | 1 | H | 11.217951  | -0.306091 | -1.189376 |
| 41 | 1 | H | 10.476371  | -3.122282 | -2.810245 |
| 42 | 1 | H | -1.895348  | -3.799713 | -0.744137 |
| 43 | 1 | H | 2.833272   | 4.474515  | -7.985883 |
| 44 | 1 | H | 5.304127   | 5.581244  | -5.966664 |
| 45 | 1 | H | 5.908437   | 3.101496  | -8.171978 |
| 46 | 1 | H | 6.071202   | -4.74591  | 2.362307  |
| 47 | 1 | H | 7.329372   | -5.922327 | -0.54491  |
| 48 | 1 | H | 9.399631   | -4.871358 | 1.915912  |
| 49 | 1 | H | 8.045251   | 1.496918  | 1.423583  |
| 50 | 1 | H | -3.897654  | -3.93301  | 3.451977  |
| 51 | 1 | H | -1.178415  | -1.977329 | 3.447607  |
| 52 | 1 | H | -5.631142  | -3.044954 | -3.334675 |
| 53 | 1 | H | -7.022918  | -1.097126 | -0.972964 |
| 54 | 1 | H | -6.641792  | -4.389338 | -0.403401 |
| 55 | 1 | H | -6.300426  | 3.924236  | 7.57312   |
| 56 | 1 | H | -6.216563  | 5.795734  | 4.795703  |
| 57 | 1 | H | -1.442043  | 5.003844  | 3.074716  |
| 58 | 1 | H | -0.994823  | 4.338766  | 6.328975  |
| 59 | 1 | H | 0.007403   | 2.109146  | 3.996266  |
| 60 | 1 | H | -7.944143  | 3.388174  | 0.71196   |
| 61 | 1 | H | -11.201582 | 0.504959  | 6.327367  |
| 62 | 1 | H | -11.009473 | -0.412145 | 1.045456  |
| 63 | 1 | H | -13.358699 | 1.756906  | 1.928169  |
| 64 | 1 | H | -9.204928  | 7.383568  | 2.881869  |
| 65 | 1 | H | -12.143669 | 6.003244  | 3.761695  |
| 66 | 1 | H | -11.475818 | 6.696884  | 0.529457  |
| 67 | 1 | H | -12.826636 | 4.003578  | -2.300649 |
| 68 | 1 | H | -10.368409 | 1.858483  | -3.092932 |
| 69 | 1 | H | -13.519635 | 0.750107  | -2.719126 |



| 3-4_en_       |               | Standard Orientation (A.U.) |            |           |           |
|---------------|---------------|-----------------------------|------------|-----------|-----------|
| Center number | Atomic number | Atomic Type                 | X          | Y         | Z         |
| 0             | 6             | C                           | 2.683929   | -0.972336 | -0.654026 |
| 1             | 6             | C                           | 0.868966   | 0.242959  | -2.6362   |
| 2             | 6             | C                           | 1.067731   | -1.344419 | -5.086568 |
| 3             | 8             | O                           | 2.942626   | -0.377166 | -6.527276 |
| 4             | 6             | C                           | 4.144094   | 1.767626  | -5.242229 |
| 5             | 6             | C                           | 6.206112   | 0.760571  | -3.46762  |
| 6             | 6             | C                           | 5.228089   | -1.47966  | -1.910098 |
| 7             | 6             | C                           | 1.97593    | 2.743299  | -3.576892 |
| 8             | 6             | C                           | 8.708619   | -0.277329 | -4.486187 |
| 9             | 6             | C                           | 9.724405   | -1.928146 | -2.272519 |
| 10            | 6             | C                           | 7.535013   | -2.178715 | -0.305442 |
| 11            | 6             | C                           | -1.882638  | 0.433435  | -1.765461 |
| 12            | 6             | C                           | -3.155957  | -1.920477 | -0.710237 |
| 13            | 8             | O                           | -2.997703  | 2.431491  | -1.934832 |
| 14            | 6             | C                           | 5.078794   | 3.580598  | -7.245799 |
| 15            | 8             | O                           | -0.147882  | -3.163096 | -5.682143 |
| 16            | 1             | H                           | 4.976644   | -3.071504 | -3.233931 |
| 17            | 6             | C                           | 7.372587   | -4.77995  | 0.922936  |
| 18            | 8             | O                           | 7.72615    | -0.269197 | 1.595232  |
| 19            | 1             | H                           | 6.639968   | 2.300383  | -2.135592 |
| 20            | 6             | C                           | -3.208255  | -1.792446 | 2.233377  |
| 21            | 6             | C                           | -5.787161  | -2.22596  | -1.873356 |
| 22            | 6             | C                           | -4.706965  | 0.360172  | 3.285418  |
| 23            | 6             | C                           | -3.937086  | 2.705489  | 3.956903  |
| 24            | 6             | C                           | -6.088156  | 4.300178  | 4.932626  |
| 25            | 6             | C                           | -8.516987  | 2.777827  | 4.32573   |
| 26            | 6             | C                           | -7.445711  | 0.112757  | 3.761765  |
| 27            | 6             | C                           | -1.336563  | 3.778778  | 3.80392   |
| 28            | 8             | O                           | -8.6634    | -1.828256 | 3.717753  |
| 29            | 6             | C                           | -9.829774  | 3.843512  | 1.907905  |
| 30            | 8             | O                           | -10.175688 | 2.58475   | 6.404454  |
| 31            | 6             | C                           | -11.749496 | 2.043808  | 0.648271  |
| 32            | 6             | C                           | -11.020959 | 6.438748  | 2.433012  |
| 33            | 6             | C                           | -13.979512 | 1.181571  | 2.274133  |
| 34            | 1             | H                           | 1.8808     | -2.738594 | 0.086009  |
| 35            | 1             | H                           | 2.926824   | 0.343071  | 0.937167  |
| 36            | 1             | H                           | 0.563464   | 3.770042  | -4.700386 |
| 37            | 1             | H                           | 2.624912   | 3.984344  | -2.045485 |
| 38            | 1             | H                           | 8.346615   | -1.454229 | -6.164277 |
| 39            | 1             | H                           | 10.042227  | 1.214732  | -5.042966 |

|    |   |   |            |           |           |
|----|---|---|------------|-----------|-----------|
| 40 | 1 | H | 11.36826   | -1.05296  | -1.346144 |
| 41 | 1 | H | 10.328573  | -3.800218 | -2.944957 |
| 42 | 1 | H | -2.00767   | -3.569895 | -1.234196 |
| 43 | 1 | H | 6.475521   | 2.661093  | -8.479191 |
| 44 | 1 | H | 3.498453   | 4.247573  | -8.419406 |
| 45 | 1 | H | 5.979574   | 5.223862  | -6.342713 |
| 46 | 1 | H | 5.803888   | -4.838239 | 2.28713   |
| 47 | 1 | H | 7.072548   | -6.269771 | -0.497204 |
| 48 | 1 | H | 9.132828   | -5.225366 | 1.947869  |
| 49 | 1 | H | 9.207127   | -0.61586  | 2.604216  |
| 50 | 1 | H | -4.076985  | -3.561619 | 2.902956  |
| 51 | 1 | H | -1.261066  | -1.744347 | 2.960398  |
| 52 | 1 | H | -6.812961  | -3.785966 | -0.964541 |
| 53 | 1 | H | -5.619969  | -2.616947 | -3.90788  |
| 54 | 1 | H | -6.900345  | -0.491376 | -1.635767 |
| 55 | 1 | H | -5.94389   | 4.539259  | 6.998603  |
| 56 | 1 | H | -6.048269  | 6.205287  | 4.092081  |
| 57 | 1 | H | -0.800368  | 4.685296  | 5.602536  |
| 58 | 1 | H | 0.093979   | 2.353461  | 3.328241  |
| 59 | 1 | H | -1.279607  | 5.254869  | 2.332396  |
| 60 | 1 | H | -8.289146  | 4.132182  | 0.531377  |
| 61 | 1 | H | -11.339664 | 3.98658   | 6.350371  |
| 62 | 1 | H | -12.460299 | 3.017321  | -1.056036 |
| 63 | 1 | H | -10.748313 | 0.358325  | -0.039101 |
| 64 | 1 | H | -11.792543 | 7.239938  | 0.675686  |
| 65 | 1 | H | -9.650587  | 7.80227   | 3.1982    |
| 66 | 1 | H | -12.615294 | 6.324246  | 3.771557  |
| 67 | 1 | H | -15.271114 | -0.001416 | 1.148852  |
| 68 | 1 | H | -13.314072 | 0.066014  | 3.890707  |
| 69 | 1 | H | -15.097599 | 2.78597   | 2.994909  |

| 3-5_en_       |               | Standard Orientation (A.U.) |            |           |           |
|---------------|---------------|-----------------------------|------------|-----------|-----------|
| Center number | Atomic number | Atomic Type                 | X          | Y         | Z         |
| 0             | 6             | C                           | 2.575946   | -1.172589 | -0.671181 |
| 1             | 6             | C                           | 0.843194   | 0.208456  | -2.618383 |
| 2             | 6             | C                           | 0.99871    | -1.286031 | -5.130802 |
| 3             | 8             | O                           | 2.935837   | -0.354215 | -6.504451 |
| 4             | 6             | C                           | 4.217755   | 1.683116  | -5.12146  |
| 5             | 6             | C                           | 6.207676   | 0.514792  | -3.364717 |
| 6             | 6             | C                           | 5.120573   | -1.738314 | -1.904301 |
| 7             | 6             | C                           | 2.075462   | 2.690649  | -3.442505 |
| 8             | 6             | C                           | 8.678313   | -0.58866  | -4.383365 |
| 9             | 6             | C                           | 9.63151    | -2.260289 | -2.163551 |
| 10            | 6             | C                           | 7.389309   | -2.585042 | -0.284026 |
| 11            | 6             | C                           | -1.902099  | 0.495065  | -1.757247 |
| 12            | 6             | C                           | -3.312693  | -1.844465 | -0.852242 |
| 13            | 8             | O                           | -2.90277   | 2.5585    | -1.807241 |
| 14            | 6             | C                           | 5.256195   | 3.526807  | -7.043904 |
| 15            | 8             | O                           | -0.299124  | -3.015664 | -5.812763 |
| 16            | 1             | H                           | 4.818795   | -3.269537 | -3.288179 |
| 17            | 6             | C                           | 7.135903   | -5.253409 | 0.771347  |
| 18            | 8             | O                           | 7.814882   | -0.829849 | 1.728501  |
| 19            | 1             | H                           | 6.692794   | 1.980663  | -1.966269 |
| 20            | 6             | C                           | -3.410596  | -1.870258 | 2.091056  |
| 21            | 6             | C                           | -5.940707  | -1.945046 | -2.056584 |
| 22            | 6             | C                           | -4.824755  | 0.293825  | 3.232629  |
| 23            | 6             | C                           | -3.957919  | 2.555969  | 4.068081  |
| 24            | 6             | C                           | -6.042403  | 4.186393  | 5.13486   |
| 25            | 6             | C                           | -8.511426  | 2.840309  | 4.37389   |
| 26            | 6             | C                           | -7.561602  | 0.172158  | 3.710928  |
| 27            | 6             | C                           | -1.305674  | 3.501959  | 4.026553  |
| 28            | 8             | O                           | -8.901878  | -1.698829 | 3.723987  |
| 29            | 6             | C                           | -9.712531  | 4.143185  | 2.01147   |
| 30            | 8             | O                           | -10.224819 | 2.703644  | 6.41644   |
| 31            | 6             | C                           | -11.629033 | 2.516807  | 0.532035  |
| 32            | 6             | C                           | -10.86338  | 6.688816  | 2.778764  |
| 33            | 6             | C                           | -13.96014  | 1.578022  | 1.965176  |
| 34            | 1             | H                           | 1.677954   | -2.927013 | -0.01512  |
| 35            | 1             | H                           | 2.830948   | 0.082979  | 0.970747  |
| 36            | 1             | H                           | 0.725331   | 3.828418  | -4.534904 |
| 37            | 1             | H                           | 2.763671   | 3.836723  | -1.855342 |
| 38            | 1             | H                           | 8.284051   | -1.749001 | -6.066448 |
| 39            | 1             | H                           | 10.058947  | 0.863834  | -4.930152 |

|    |   |   |            |           |           |
|----|---|---|------------|-----------|-----------|
| 40 | 1 | H | 11.191684  | -1.360849 | -1.130521 |
| 41 | 1 | H | 10.307272  | -4.107101 | -2.8334   |
| 42 | 1 | H | -2.246315  | -3.522186 | -1.453204 |
| 43 | 1 | H | 6.621275   | 2.590661  | -8.299723 |
| 44 | 1 | H | 3.72063    | 4.312055  | -8.203794 |
| 45 | 1 | H | 6.223357   | 5.090064  | -6.070367 |
| 46 | 1 | H | 5.517027   | -5.385418 | 2.080583  |
| 47 | 1 | H | 6.827335   | -6.639141 | -0.748331 |
| 48 | 1 | H | 8.853881   | -5.784312 | 1.8168    |
| 49 | 1 | H | 6.604022   | -1.176484 | 3.050091  |
| 50 | 1 | H | -4.367908  | -3.630455 | 2.656593  |
| 51 | 1 | H | -1.476976  | -1.953565 | 2.851832  |
| 52 | 1 | H | -5.771538  | -2.241593 | -4.106498 |
| 53 | 1 | H | -6.960372  | -0.165434 | -1.74184  |
| 54 | 1 | H | -7.0608    | -3.49333  | -1.242339 |
| 55 | 1 | H | -5.923956  | 4.259492  | 7.214691  |
| 56 | 1 | H | -5.898236  | 6.143986  | 4.444304  |
| 57 | 1 | H | -0.761357  | 4.272434  | 5.884605  |
| 58 | 1 | H | 0.060188   | 2.036685  | 3.484731  |
| 59 | 1 | H | -1.147609  | 5.057939  | 2.647575  |
| 60 | 1 | H | -8.12949   | 4.502033  | 0.698928  |
| 61 | 1 | H | -11.089808 | 1.096694  | 6.249962  |
| 62 | 1 | H | -12.251924 | 3.669984  | -1.091317 |
| 63 | 1 | H | -10.65265  | 0.87576   | -0.292234 |
| 64 | 1 | H | -12.346914 | 6.426643  | 4.207513  |
| 65 | 1 | H | -11.693122 | 7.640972  | 1.12502   |
| 66 | 1 | H | -9.442631  | 7.969272  | 3.595273  |
| 67 | 1 | H | -14.931195 | 3.109222  | 2.984152  |
| 68 | 1 | H | -15.329881 | 0.741138  | 0.639455  |
| 69 | 1 | H | -13.455255 | 0.092027  | 3.326009  |

| 3-6_en_       |               | Standard Orientation (A.U.) |            |           |           |
|---------------|---------------|-----------------------------|------------|-----------|-----------|
| Center number | Atomic number | Atomic Type                 | X          | Y         | Z         |
| 0             | 6             | C                           | 3.370624   | -1.396929 | -0.058965 |
| 1             | 6             | C                           | 1.793952   | 1.00789   | -0.719479 |
| 2             | 6             | C                           | -0.058413  | 0.251536  | -2.836328 |
| 3             | 8             | O                           | 1.078406   | 0.648198  | -5.091256 |
| 4             | 6             | C                           | 3.67277    | 1.558402  | -4.729934 |
| 5             | 6             | C                           | 5.428334   | -0.72063  | -4.370792 |
| 6             | 6             | C                           | 4.313979   | -2.620869 | -2.489516 |
| 7             | 6             | C                           | 3.470892   | 2.897781  | -2.163423 |
| 8             | 6             | C                           | 6.151716   | -2.439451 | -6.581884 |
| 9             | 6             | C                           | 7.13664    | -4.868244 | -5.251652 |
| 10            | 6             | C                           | 6.368489   | -4.685942 | -2.417514 |
| 11            | 6             | C                           | 0.711289   | 2.153424  | 1.716964  |
| 12            | 6             | C                           | -2.067624  | 2.834134  | 1.839241  |
| 13            | 8             | O                           | 2.142778   | 2.499154  | 3.472509  |
| 14            | 6             | C                           | 4.335816   | 3.236132  | -6.94821  |
| 15            | 8             | O                           | -2.138283  | -0.643317 | -2.661117 |
| 16            | 1             | H                           | 2.673896   | -3.509863 | -3.424092 |
| 17            | 6             | C                           | 5.475962   | -7.181823 | -1.28876  |
| 18            | 8             | O                           | 8.554469   | -3.801499 | -1.099601 |
| 19            | 1             | H                           | 7.188443   | 0.016411  | -3.534622 |
| 20            | 6             | C                           | -2.931826  | 3.383297  | 4.564024  |
| 21            | 6             | C                           | -2.665228  | 5.043587  | 0.045243  |
| 22            | 6             | C                           | -5.747486  | 3.252447  | 4.699332  |
| 23            | 6             | C                           | -7.533692  | 5.085659  | 4.814306  |
| 24            | 6             | C                           | -10.183227 | 4.000416  | 4.794542  |
| 25            | 6             | C                           | -9.829059  | 1.226767  | 3.9665    |
| 26            | 6             | C                           | -7.044201  | 0.787991  | 4.651376  |
| 27            | 6             | C                           | -7.127999  | 7.869987  | 4.965616  |
| 28            | 8             | O                           | -6.154652  | -1.278422 | 5.13439   |
| 29            | 6             | C                           | -10.182774 | 0.897384  | 1.048645  |
| 30            | 8             | O                           | -11.383836 | -0.465195 | 5.310516  |
| 31            | 6             | C                           | -9.463405  | -1.781597 | 0.154327  |
| 32            | 6             | C                           | -12.908552 | 1.511763  | 0.284112  |
| 33            | 6             | C                           | -8.87147   | -1.938331 | -2.670591 |
| 34            | 1             | H                           | 2.18583    | -2.711963 | 1.035611  |
| 35            | 1             | H                           | 4.933089   | -0.776095 | 1.163833  |
| 36            | 1             | H                           | 2.512723   | 4.732385  | -2.37179  |
| 37            | 1             | H                           | 5.304709   | 3.208863  | -1.247636 |
| 38            | 1             | H                           | 4.461818   | -2.854717 | -7.724632 |
| 39            | 1             | H                           | 7.571646   | -1.594549 | -7.840987 |

|    |   |   |            |           |           |
|----|---|---|------------|-----------|-----------|
| 40 | 1 | H | 9.205682   | -5.016327 | -5.336805 |
| 41 | 1 | H | 6.350395   | -6.584204 | -6.119645 |
| 42 | 1 | H | -3.086892  | 1.162876  | 1.129044  |
| 43 | 1 | H | 3.024803   | 4.845024  | -7.070256 |
| 44 | 1 | H | 6.270707   | 3.965861  | -6.724703 |
| 45 | 1 | H | 4.238432   | 2.172035  | -8.729856 |
| 46 | 1 | H | 6.990371   | -8.603512 | -1.397517 |
| 47 | 1 | H | 4.955965   | -6.947374 | 0.71702   |
| 48 | 1 | H | 3.805195   | -7.909259 | -2.291208 |
| 49 | 1 | H | 8.164453   | -3.762319 | 0.684436  |
| 50 | 1 | H | -2.133712  | 1.932126  | 5.820565  |
| 51 | 1 | H | -2.189932  | 5.217495  | 5.201324  |
| 52 | 1 | H | -2.216168  | 4.610245  | -1.935295 |
| 53 | 1 | H | -1.6174    | 6.755028  | 0.602119  |
| 54 | 1 | H | -4.69684   | 5.475673  | 0.124288  |
| 55 | 1 | H | -11.008737 | 4.023095  | 6.708289  |
| 56 | 1 | H | -11.449952 | 5.105227  | 3.57167   |
| 57 | 1 | H | -5.117801  | 8.383285  | 5.022956  |
| 58 | 1 | H | -8.002819  | 8.814681  | 3.323325  |
| 59 | 1 | H | -8.06316   | 8.655741  | 6.656062  |
| 60 | 1 | H | -8.888114  | 2.255012  | 0.127796  |
| 61 | 1 | H | -10.355489 | -1.960664 | 5.591429  |
| 62 | 1 | H | -7.811271  | -2.472273 | 1.207564  |
| 63 | 1 | H | -11.029824 | -3.070931 | 0.638225  |
| 64 | 1 | H | -13.394852 | 3.513901  | 0.561763  |
| 65 | 1 | H | -14.221537 | 0.364932  | 1.4186    |
| 66 | 1 | H | -13.227954 | 1.075407  | -1.722883 |
| 67 | 1 | H | -8.562105  | -3.912489 | -3.25292  |
| 68 | 1 | H | -10.417947 | -1.181992 | -3.84259  |
| 69 | 1 | H | -7.132549  | -0.890435 | -3.129449 |

| 3-7_en_       |               | Standard Orientation (A.U.) |            |           |           |
|---------------|---------------|-----------------------------|------------|-----------|-----------|
| Center number | Atomic number | Atomic Type                 | X          | Y         | Z         |
| 0             | 6             | C                           | 2.447321   | -1.154486 | -0.595226 |
| 1             | 6             | C                           | 0.578088   | 0.007606  | -2.558253 |
| 2             | 6             | C                           | 0.7293     | -1.625683 | -4.981816 |
| 3             | 8             | O                           | 2.558942   | -0.672147 | -6.48684  |
| 4             | 6             | C                           | 3.776404   | 1.504813  | -5.271525 |
| 5             | 6             | C                           | 5.886973   | 0.54575   | -3.528014 |
| 6             | 6             | C                           | 4.964105   | -1.668915 | -1.901959 |
| 7             | 6             | C                           | 1.641745   | 2.49745   | -3.573566 |
| 8             | 6             | C                           | 8.370697   | -0.496519 | -4.586025 |
| 9             | 6             | C                           | 9.457807   | -2.080074 | -2.357908 |
| 10            | 6             | C                           | 7.31386    | -2.318061 | -0.338777 |
| 11            | 6             | C                           | -2.149268  | 0.193703  | -1.620741 |
| 12            | 6             | C                           | -3.384177  | -2.156658 | -0.510233 |
| 13            | 8             | O                           | -3.277873  | 2.184947  | -1.775111 |
| 14            | 6             | C                           | 4.651102   | 3.284715  | -7.330898 |
| 15            | 8             | O                           | -0.486708  | -3.464709 | -5.510923 |
| 16            | 1             | H                           | 4.693314   | -3.289456 | -3.186556 |
| 17            | 6             | C                           | 7.204242   | -4.899629 | 0.936291  |
| 18            | 8             | O                           | 7.527441   | -0.375094 | 1.525026  |
| 19            | 1             | H                           | 6.342664   | 2.115092  | -2.238086 |
| 20            | 6             | C                           | -3.411724  | -1.968458 | 2.428281  |
| 21            | 6             | C                           | -6.023179  | -2.51185  | -1.638782 |
| 22            | 6             | C                           | -4.911821  | 0.196148  | 3.453091  |
| 23            | 6             | C                           | -4.132118  | 2.538173  | 4.142794  |
| 24            | 6             | C                           | -6.270901  | 4.135365  | 5.153171  |
| 25            | 6             | C                           | -8.688095  | 2.65304   | 4.482972  |
| 26            | 6             | C                           | -7.634231  | -0.009558 | 3.977511  |
| 27            | 6             | C                           | -1.525035  | 3.592811  | 3.994365  |
| 28            | 8             | O                           | -8.897364  | -1.927691 | 4.134545  |
| 29            | 6             | C                           | -9.931158  | 3.768042  | 2.047834  |
| 30            | 8             | O                           | -10.402321 | 2.567844  | 6.526401  |
| 31            | 6             | C                           | -11.784772 | 1.989057  | 0.66736   |
| 32            | 6             | C                           | -11.177265 | 6.310793  | 2.661454  |
| 33            | 6             | C                           | -14.096167 | 1.06916   | 2.1436    |
| 34            | 1             | H                           | 1.67446    | -2.91095  | 0.199104  |
| 35            | 1             | H                           | 2.715746   | 0.194824  | 0.963243  |
| 36            | 1             | H                           | 0.195164   | 3.492294  | -4.682237 |
| 37            | 1             | H                           | 2.316891   | 3.772156  | -2.081792 |
| 38            | 1             | H                           | 7.9748     | -1.718803 | -6.223588 |
| 39            | 1             | H                           | 9.6759     | 0.991423  | -5.216274 |

|    |   |   |            |           |           |
|----|---|---|------------|-----------|-----------|
| 40 | 1 | H | 11.103407  | -1.154163 | -1.485721 |
| 41 | 1 | H | 10.082186  | -3.956439 | -2.999025 |
| 42 | 1 | H | -2.223261  | -3.803535 | -1.012765 |
| 43 | 1 | H | 6.021221   | 2.348845  | -8.58163  |
| 44 | 1 | H | 3.038945   | 3.922827  | -8.476931 |
| 45 | 1 | H | 5.566016   | 4.948295  | -6.481004 |
| 46 | 1 | H | 5.663048   | -4.951733 | 2.331721  |
| 47 | 1 | H | 6.893641   | -6.416676 | -0.452334 |
| 48 | 1 | H | 8.988875   | -5.308079 | 1.933942  |
| 49 | 1 | H | 9.033018   | -0.690481 | 2.507557  |
| 50 | 1 | H | -4.254652  | -3.731362 | 3.14703   |
| 51 | 1 | H | -1.457539  | -1.888943 | 3.13367   |
| 52 | 1 | H | -5.874909  | -2.940387 | -3.666942 |
| 53 | 1 | H | -7.149154  | -0.78321  | -1.421459 |
| 54 | 1 | H | -7.023495  | -4.067059 | -0.692233 |
| 55 | 1 | H | -6.136869  | 4.310666  | 7.226     |
| 56 | 1 | H | -6.215859  | 6.062238  | 4.37055   |
| 57 | 1 | H | -0.985971  | 4.501093  | 5.79056   |
| 58 | 1 | H | -0.10205   | 2.159012  | 3.519746  |
| 59 | 1 | H | -1.462138  | 5.066508  | 2.52027   |
| 60 | 1 | H | -8.360311  | 4.103448  | 0.715177  |
| 61 | 1 | H | -11.171237 | 0.904619  | 6.471671  |
| 62 | 1 | H | -12.431913 | 3.015042  | -1.030181 |
| 63 | 1 | H | -10.751676 | 0.330681  | -0.044768 |
| 64 | 1 | H | -12.644752 | 6.081289  | 4.112303  |
| 65 | 1 | H | -12.048775 | 7.124989  | 0.956279  |
| 66 | 1 | H | -9.804991  | 7.694067  | 3.38819   |
| 67 | 1 | H | -15.427294 | 0.106758  | 0.864204  |
| 68 | 1 | H | -13.559175 | -0.310567 | 3.600609  |
| 69 | 1 | H | -15.124457 | 2.629621  | 3.056411  |



| 3-8_en_       |               | Standard Orientation (A.U.) |            |           |           |
|---------------|---------------|-----------------------------|------------|-----------|-----------|
| Center number | Atomic number | Atomic Type                 | X          | Y         | Z         |
| 0             | 6             | C                           | 2.384058   | -1.119226 | -0.480241 |
| 1             | 6             | C                           | 0.455322   | 0.040408  | -2.386661 |
| 2             | 6             | C                           | 0.507896   | -1.616768 | -4.798368 |
| 3             | 8             | O                           | 2.288683   | -0.690623 | -6.377019 |
| 4             | 6             | C                           | 3.565585   | 1.487112  | -5.226248 |
| 5             | 6             | C                           | 5.729842   | 0.527714  | -3.550463 |
| 6             | 6             | C                           | 4.850215   | -1.662526 | -1.868868 |
| 7             | 6             | C                           | 1.501394   | 2.512392  | -3.462205 |
| 8             | 6             | C                           | 8.166844   | -0.544299 | -4.684991 |
| 9             | 6             | C                           | 9.321138   | -2.11225  | -2.479069 |
| 10            | 6             | C                           | 7.249572   | -2.30879  | -0.3816   |
| 11            | 6             | C                           | -2.233856  | 0.258672  | -1.351713 |
| 12            | 6             | C                           | -3.444576  | -2.068242 | -0.167914 |
| 13            | 8             | O                           | -3.349495  | 2.259147  | -1.485328 |
| 14            | 6             | C                           | 4.38132    | 3.241975  | -7.33091  |
| 15            | 8             | O                           | -0.737539  | -3.453101 | -5.26452  |
| 16            | 1             | H                           | 4.525171   | -3.295698 | -3.124735 |
| 17            | 6             | C                           | 7.167821   | -4.872477 | 0.931305  |
| 18            | 8             | O                           | 7.542659   | -0.342874 | 1.446918  |
| 19            | 1             | H                           | 6.243781   | 2.106638  | -2.294583 |
| 20            | 6             | C                           | -3.330172  | -1.8543   | 2.770042  |
| 21            | 6             | C                           | -6.138293  | -2.40288  | -1.170019 |
| 22            | 6             | C                           | -4.746138  | 0.3561    | 3.810941  |
| 23            | 6             | C                           | -3.905461  | 2.68724   | 4.461701  |
| 24            | 6             | C                           | -6.014839  | 4.360341  | 5.420446  |
| 25            | 6             | C                           | -8.454923  | 2.968858  | 4.637883  |
| 26            | 6             | C                           | -7.475037  | 0.252217  | 4.329149  |
| 27            | 6             | C                           | -1.27404   | 3.674108  | 4.289924  |
| 28            | 8             | O                           | -8.795744  | -1.613955 | 4.600818  |
| 29            | 6             | C                           | -9.470552  | 3.977565  | 2.051909  |
| 30            | 8             | O                           | -10.352076 | 3.036463  | 6.504823  |
| 31            | 6             | C                           | -11.622982 | 2.316254  | 1.010993  |
| 32            | 6             | C                           | -10.353645 | 6.722744  | 2.333823  |
| 33            | 6             | C                           | -12.224949 | 2.799564  | -1.773123 |
| 34            | 1             | H                           | 1.626684   | -2.864354 | 0.352951  |
| 35            | 1             | H                           | 2.714243   | 0.239998  | 1.057322  |
| 36            | 1             | H                           | 0.0241     | 3.510328  | -4.526632 |
| 37            | 1             | H                           | 2.239955   | 3.793261  | -2.00632  |
| 38            | 1             | H                           | 7.70536    | -1.78058  | -6.294586 |
| 39            | 1             | H                           | 9.458917   | 0.927978  | -5.376126 |

|    |   |   |            |           |           |
|----|---|---|------------|-----------|-----------|
| 40 | 1 | H | 11.00505   | -1.191271 | -1.67771  |
| 41 | 1 | H | 9.905212   | -4.001429 | -3.120502 |
| 42 | 1 | H | -2.328027  | -3.7323   | -0.713041 |
| 43 | 1 | H | 2.735247   | 3.886179  | -8.424146 |
| 44 | 1 | H | 5.340991   | 4.903485  | -6.527528 |
| 45 | 1 | H | 5.697659   | 2.283596  | -8.621709 |
| 46 | 1 | H | 5.675675   | -4.895518 | 2.379876  |
| 47 | 1 | H | 6.79952    | -6.405776 | -0.424937 |
| 48 | 1 | H | 8.983299   | -5.279625 | 1.872198  |
| 49 | 1 | H | 9.080583   | -0.655404 | 2.378997  |
| 50 | 1 | H | -4.173375  | -3.592569 | 3.5464    |
| 51 | 1 | H | -1.345606  | -1.80365  | 3.385314  |
| 52 | 1 | H | -6.087691  | -2.833555 | -3.202565 |
| 53 | 1 | H | -7.249854  | -0.672424 | -0.903118 |
| 54 | 1 | H | -7.101393  | -3.953273 | -0.178445 |
| 55 | 1 | H | -5.959813  | 4.499486  | 7.499689  |
| 56 | 1 | H | -5.851189  | 6.292457  | 4.672599  |
| 57 | 1 | H | 0.10759    | 2.200946  | 3.813393  |
| 58 | 1 | H | -1.18679   | 5.139458  | 2.807999  |
| 59 | 1 | H | -0.696425  | 4.57942   | 6.075694  |
| 60 | 1 | H | -7.873737  | 3.896919  | 0.709717  |
| 61 | 1 | H | -11.094787 | 1.356002  | 6.504862  |
| 62 | 1 | H | -11.145369 | 0.307598  | 1.244259  |
| 63 | 1 | H | -13.324692 | 2.628894  | 2.17539   |
| 64 | 1 | H | -11.782074 | 6.846592  | 3.840311  |
| 65 | 1 | H | -11.199943 | 7.418422  | 0.568021  |
| 66 | 1 | H | -8.799317  | 8.016759  | 2.812901  |
| 67 | 1 | H | -12.837724 | 4.757332  | -2.122595 |
| 68 | 1 | H | -10.554676 | 2.445557  | -2.968075 |
| 69 | 1 | H | -13.749169 | 1.546056  | -2.434891 |

| 3-9_en_       |               | Standard Orientation (A.U.) |            |           |           |
|---------------|---------------|-----------------------------|------------|-----------|-----------|
| Center number | Atomic number | Atomic Type                 | X          | Y         | Z         |
| 0             | 6             | C                           | 1.458402   | 0.061866  | 0.010297  |
| 1             | 6             | C                           | 1.734121   | 2.362542  | -1.821661 |
| 2             | 6             | C                           | 0.343601   | 1.688619  | -4.304272 |
| 3             | 8             | O                           | 1.991141   | 0.531558  | -5.863837 |
| 4             | 6             | C                           | 4.46226    | 0.245184  | -4.62275  |
| 5             | 6             | C                           | 4.425619   | -2.181964 | -3.028188 |
| 6             | 6             | C                           | 2.006249   | -2.353704 | -1.450077 |
| 7             | 6             | C                           | 4.452079   | 2.502485  | -2.793883 |
| 8             | 6             | C                           | 4.51472    | -4.804302 | -4.243163 |
| 9             | 6             | C                           | 3.585722   | -6.572141 | -2.087706 |
| 10            | 6             | C                           | 2.326418   | -4.876371 | -0.034811 |
| 11            | 6             | C                           | 0.73768    | 4.785292  | -0.619716 |
| 12            | 6             | C                           | -2.018431  | 4.782397  | 0.211164  |
| 13            | 8             | O                           | 2.096867   | 6.599467  | -0.300718 |
| 14            | 6             | C                           | 6.475404   | 0.30917   | -6.650725 |
| 15            | 8             | O                           | -1.834847  | 2.04488   | -4.846271 |
| 16            | 1             | H                           | 0.42719    | -2.66221  | -2.778435 |
| 17            | 6             | C                           | -0.147531  | -5.927876 | 1.006443  |
| 18            | 8             | O                           | 4.132014   | -4.612547 | 1.95896   |
| 19            | 1             | H                           | 6.02101    | -2.037183 | -1.694557 |
| 20            | 6             | C                           | -2.191393  | 4.799778  | 3.148006  |
| 21            | 6             | C                           | -3.434327  | 7.002185  | -0.979584 |
| 22            | 6             | C                           | -4.627267  | 3.604888  | 3.925643  |
| 23            | 6             | C                           | -6.914574  | 4.606351  | 4.511413  |
| 24            | 6             | C                           | -8.888487  | 2.574633  | 4.933635  |
| 25            | 6             | C                           | -7.667763  | 0.149884  | 3.864644  |
| 26            | 6             | C                           | -4.863135  | 0.835794  | 4.013281  |
| 27            | 6             | C                           | -7.577811  | 7.332025  | 4.762275  |
| 28            | 8             | O                           | -3.170747  | -0.719963 | 4.220987  |
| 29            | 6             | C                           | -8.39063   | -0.278027 | 1.023741  |
| 30            | 8             | O                           | -8.189532  | -2.01324  | 5.320625  |
| 31            | 6             | C                           | -6.827128  | -2.412113 | -0.199718 |
| 32            | 6             | C                           | -11.222994 | -0.830399 | 0.783148  |
| 33            | 6             | C                           | -6.778492  | -2.315216 | -3.087908 |
| 34            | 1             | H                           | -0.424686  | -0.005918 | 0.867955  |
| 35            | 1             | H                           | 2.838089   | 0.313997  | 1.549256  |
| 36            | 1             | H                           | 4.772549   | 4.289869  | -3.804405 |
| 37            | 1             | H                           | 5.872802   | 2.337602  | -1.291909 |
| 38            | 1             | H                           | 3.2087     | -4.86587  | -5.863959 |
| 39            | 1             | H                           | 6.402462   | -5.324463 | -4.938247 |

|    |   |   |            |           |           |
|----|---|---|------------|-----------|-----------|
| 40 | 1 | H | 5.161505   | -7.579584 | -1.186199 |
| 41 | 1 | H | 2.251597   | -8.000737 | -2.791906 |
| 42 | 1 | H | -2.887137  | 3.029284  | -0.476233 |
| 43 | 1 | H | 8.353591   | 0.117505  | -5.777522 |
| 44 | 1 | H | 6.218828   | -1.249703 | -8.000524 |
| 45 | 1 | H | 6.405526   | 2.105635  | -7.693902 |
| 46 | 1 | H | -1.546673  | -6.191762 | -0.510308 |
| 47 | 1 | H | 0.185117   | -7.764732 | 1.924868  |
| 48 | 1 | H | -0.979058  | -4.627882 | 2.406057  |
| 49 | 1 | H | 3.301088   | -3.776134 | 3.354468  |
| 50 | 1 | H | -0.639758  | 3.675085  | 3.959104  |
| 51 | 1 | H | -1.972984  | 6.74321   | 3.849922  |
| 52 | 1 | H | -5.407774  | 7.036983  | -0.324882 |
| 53 | 1 | H | -3.451992  | 6.820305  | -3.049177 |
| 54 | 1 | H | -2.523225  | 8.800995  | -0.471033 |
| 55 | 1 | H | -9.251555  | 2.296418  | 6.966801  |
| 56 | 1 | H | -10.702244 | 3.078368  | 4.052774  |
| 57 | 1 | H | -8.381879  | 7.717184  | 6.647484  |
| 58 | 1 | H | -5.94762   | 8.580731  | 4.464882  |
| 59 | 1 | H | -9.056565  | 7.840984  | 3.381511  |
| 60 | 1 | H | -7.951435  | 1.498911  | 0.018285  |
| 61 | 1 | H | -6.639481  | -2.996284 | 5.334893  |
| 62 | 1 | H | -4.866634  | -2.347132 | 0.480044  |
| 63 | 1 | H | -7.587972  | -4.241794 | 0.450957  |
| 64 | 1 | H | -12.404693 | 0.793692  | 1.319148  |
| 65 | 1 | H | -11.728426 | -2.430675 | 2.010956  |
| 66 | 1 | H | -11.714391 | -1.326325 | -1.174383 |
| 67 | 1 | H | -5.721351  | -3.933872 | -3.861676 |
| 68 | 1 | H | -8.688497  | -2.379414 | -3.913706 |
| 69 | 1 | H | -5.837739  | -0.587114 | -3.768562 |

**Table S4.** Gibbs free energies<sup>a</sup> and equilibrium populations<sup>b</sup> of low-energy conformers of **4**.

| Conformers | $\Delta G$ (a.u.) | P(%)/100 | G(a.u.)      |
|------------|-------------------|----------|--------------|
| 4-1_en     | 0.00075           | 28.66    | -1464.51661  |
| 4-2_en     | 0.00336           | 1.81     | -1464.514001 |
| 4-3_en     | 0.01316           | 0.0      | -1464.504196 |
| 4-4_en     | 0.00629           | 0.08     | -1464.511074 |
| 4-5_en     | 0.0               | 63.45    | -1464.51736  |
| 4-6_en     | 0.00494           | 0.34     | -1464.512423 |
| 4-7_en     | 0.00411           | 0.82     | -1464.513253 |
| 4-8_en     | 0.00309           | 2.42     | -1464.514275 |
| 4-9_en     | 0.00308           | 2.43     | -1464.514279 |

<sup>a</sup>wB97M-V/def2-TZVP, in a.u.<sup>b</sup>From  $\Delta G$  values at 298.15 K.

**Table S5.** Cartesian coordinates for the low-energy reoptimized random research conformers of **4** at B3LYP-D3(BJ)/6-31G\* level of theory in chloroform.

| 4-1_en_       |               | Standard Orientation (A.U.) |            |           |           |
|---------------|---------------|-----------------------------|------------|-----------|-----------|
| Center number | Atomic number | Atomic Type                 | X          | Y         | Z         |
| 0             | 6             | C                           | 0.670741   | -0.736834 | 0.598083  |
| 1             | 6             | C                           | 1.638194   | 1.137547  | -1.470303 |
| 2             | 6             | C                           | 0.814483   | 0.103142  | -4.076643 |
| 3             | 8             | O                           | 2.638661   | -1.460776 | -4.938372 |
| 4             | 6             | C                           | 4.700002   | -1.654439 | -3.08829  |
| 5             | 6             | C                           | 4.03291    | -3.716074 | -1.156914 |
| 6             | 6             | C                           | 1.304887   | -3.418195 | -0.227762 |
| 7             | 6             | C                           | 4.507935   | 0.906682  | -1.730917 |
| 8             | 6             | C                           | 4.114373   | -6.525859 | -1.847538 |
| 9             | 6             | C                           | 2.424353   | -7.790928 | 0.204113  |
| 10            | 6             | C                           | 1.021274   | -5.615344 | 1.633941  |
| 11            | 6             | C                           | 0.676992   | 3.81937   | -1.040629 |
| 12            | 6             | C                           | -2.173298  | 4.178108  | -0.829749 |
| 13            | 8             | O                           | 2.12861    | 5.577684  | -0.825558 |
| 14            | 6             | C                           | 7.129073   | -2.112649 | -4.524614 |
| 15            | 8             | O                           | -1.102931  | 0.516746  | -5.219542 |
| 16            | 1             | H                           | 0.061707   | -3.903208 | -1.831545 |
| 17            | 6             | C                           | -1.714684  | -6.224156 | 2.304146  |
| 18            | 8             | O                           | 2.387179   | -4.900453 | 3.852078  |
| 19            | 1             | H                           | 5.282262   | -3.413902 | 0.480844  |
| 20            | 6             | C                           | -2.844398  | 4.687673  | 1.980551  |
| 21            | 6             | C                           | -3.064875  | 6.307154  | -2.566019 |
| 22            | 6             | C                           | -5.591831  | 4.253525  | 2.458144  |
| 23            | 6             | C                           | -7.517516  | 5.913656  | 2.800558  |
| 24            | 6             | C                           | -10.014578 | 4.595372  | 3.23241   |
| 25            | 6             | C                           | -9.507715  | 1.788872  | 2.660629  |
| 26            | 6             | C                           | -6.605368  | 1.67228   | 2.625386  |
| 27            | 6             | C                           | -7.363998  | 8.725143  | 2.813057  |
| 28            | 8             | O                           | -5.414853  | -0.297337 | 2.795109  |
| 29            | 6             | C                           | -10.626847 | 0.964772  | 0.055484  |
| 30            | 8             | O                           | -10.439065 | 0.246469  | 4.633943  |
| 31            | 6             | C                           | -10.340058 | -1.895946 | -0.372212 |
| 32            | 6             | C                           | -9.569893  | 2.49897   | -2.161755 |
| 33            | 6             | C                           | -11.707544 | -2.879856 | -2.718785 |
| 34            | 1             | H                           | -1.368928  | -0.535674 | 0.913007  |
| 35            | 1             | H                           | 1.634827   | -0.293572 | 2.386235  |
| 36            | 1             | H                           | 5.257699   | 2.443995  | -2.910735 |

|    |   |   |            |           |           |
|----|---|---|------------|-----------|-----------|
| 37 | 1 | H | 5.497535   | 0.933292  | 0.09155   |
| 38 | 1 | H | 3.292814   | -6.803402 | -3.740038 |
| 39 | 1 | H | 6.040891   | -7.303215 | -1.881975 |
| 40 | 1 | H | 3.558423   | -8.871434 | 1.572017  |
| 41 | 1 | H | 1.067842   | -9.114952 | -0.649726 |
| 42 | 1 | H | -3.091609  | 2.412415  | -1.412804 |
| 43 | 1 | H | 7.031488   | -3.891049 | -5.595018 |
| 44 | 1 | H | 7.497221   | -0.559285 | -5.855946 |
| 45 | 1 | H | 8.719593   | -2.236771 | -3.18953  |
| 46 | 1 | H | -2.803527  | -6.732952 | 0.606056  |
| 47 | 1 | H | -1.808056  | -7.840297 | 3.619867  |
| 48 | 1 | H | -2.636115  | -4.588561 | 3.196699  |
| 49 | 1 | H | 2.216627   | -6.242344 | 5.077059  |
| 50 | 1 | H | -1.776082  | 3.380987  | 3.199098  |
| 51 | 1 | H | -2.250437  | 6.614706  | 2.48342   |
| 52 | 1 | H | -5.095656  | 6.663022  | -2.29683  |
| 53 | 1 | H | -2.760019  | 5.791502  | -4.555936 |
| 54 | 1 | H | -2.014631  | 8.056136  | -2.164308 |
| 55 | 1 | H | -10.598437 | 4.772587  | 5.224814  |
| 56 | 1 | H | -11.536444 | 5.423665  | 2.075934  |
| 57 | 1 | H | -8.090633  | 9.489561  | 4.612302  |
| 58 | 1 | H | -5.432124  | 9.422111  | 2.520528  |
| 59 | 1 | H | -8.579699  | 9.51203   | 1.311243  |
| 60 | 1 | H | -12.671789 | 1.365242  | 0.220821  |
| 61 | 1 | H | -9.321031  | -1.203334 | 4.723976  |
| 62 | 1 | H | -8.317105  | -2.384173 | -0.474371 |
| 63 | 1 | H | -11.10044  | -2.87035  | 1.300976  |
| 64 | 1 | H | -7.575505  | 2.029988  | -2.533575 |
| 65 | 1 | H | -10.629729 | 2.098394  | -3.902577 |
| 66 | 1 | H | -9.686893  | 4.54874   | -1.837662 |
| 67 | 1 | H | -13.720526 | -2.337063 | -2.703622 |
| 68 | 1 | H | -10.872654 | -2.152671 | -4.480105 |
| 69 | 1 | H | -11.619016 | -4.957182 | -2.808066 |

| 4-2_en_       |               | Standard Orientation (A.U.) |           |           |           |
|---------------|---------------|-----------------------------|-----------|-----------|-----------|
| Center number | Atomic number | Atomic Type                 | X         | Y         | Z         |
| 0             | 6             | C                           | -2.076762 | 0.491874  | -2.146714 |
| 1             | 6             | C                           | -0.111019 | 1.817221  | -0.39033  |
| 2             | 6             | C                           | 2.06585   | 2.704097  | -2.124206 |
| 3             | 8             | O                           | 3.783211  | 0.823597  | -2.284722 |
| 4             | 6             | C                           | 2.956329  | -1.384485 | -0.815449 |
| 5             | 6             | C                           | 1.223375  | -3.022543 | -2.464895 |
| 6             | 6             | C                           | -0.723085 | -1.392308 | -3.857422 |
| 7             | 6             | C                           | 1.282448  | -0.154188 | 1.204955  |
| 8             | 6             | C                           | 2.249052  | -4.662469 | -4.612872 |
| 9             | 6             | C                           | -0.145141 | -5.237486 | -6.216653 |
| 10            | 6             | C                           | -2.250008 | -3.368569 | -5.354023 |
| 11            | 6             | C                           | -1.260549 | 3.946296  | 1.202626  |
| 12            | 6             | C                           | -2.720256 | 6.083427  | -0.073044 |
| 13            | 8             | O                           | -1.017778 | 3.909363  | 3.48053   |
| 14            | 6             | C                           | 5.289874  | -2.718338 | 0.156798  |
| 15            | 8             | O                           | 2.258001  | 4.662818  | -3.252102 |
| 16            | 1             | H                           | 0.325389  | -0.299842 | -5.291878 |
| 17            | 6             | C                           | -3.779327 | -2.258102 | -7.528481 |
| 18            | 8             | O                           | -3.88335  | -4.761905 | -3.705093 |
| 19            | 1             | H                           | 0.188003  | -4.265193 | -1.152833 |
| 20            | 6             | C                           | -5.321126 | 6.417751  | 1.227176  |
| 21            | 6             | C                           | -1.174448 | 8.535905  | 0.085583  |
| 22            | 6             | C                           | -6.725545 | 3.994865  | 1.656595  |
| 23            | 6             | C                           | -8.003524 | 2.499091  | 0.015873  |
| 24            | 6             | C                           | -9.14556  | 0.207416  | 1.296285  |
| 25            | 6             | C                           | -7.934825 | 0.161077  | 3.949267  |
| 26            | 6             | C                           | -7.038203 | 2.912423  | 4.211613  |
| 27            | 6             | C                           | -8.418162 | 2.956449  | -2.734283 |
| 28            | 8             | O                           | -6.835442 | 3.978971  | 6.232129  |
| 29            | 6             | C                           | -5.626946 | -1.667427 | 4.034487  |
| 30            | 8             | O                           | -9.667141 | -0.402399 | 5.887476  |
| 31            | 6             | C                           | -6.492555 | -4.442782 | 3.889841  |
| 32            | 6             | C                           | -3.95656  | -1.208014 | 6.352439  |
| 33            | 6             | C                           | -4.421242 | -6.243769 | 2.982278  |
| 34            | 1             | H                           | -3.093308 | 1.90263   | -3.277114 |
| 35            | 1             | H                           | -3.461582 | -0.480034 | -0.942969 |
| 36            | 1             | H                           | 2.419861  | 0.78763   | 2.663773  |
| 37            | 1             | H                           | 0.016345  | -1.502948 | 2.140837  |
| 38            | 1             | H                           | 3.638393  | -3.577473 | -5.720592 |
| 39            | 1             | H                           | 3.188412  | -6.390092 | -3.943897 |



|    |   |   |            |           |           |
|----|---|---|------------|-----------|-----------|
| 40 | 1 | H | -0.846038  | -7.165688 | -5.899332 |
| 41 | 1 | H | 0.230887   | -5.036807 | -8.249897 |
| 42 | 1 | H | -2.994535  | 5.616109  | -2.078449 |
| 43 | 1 | H | 4.732507   | -4.368314 | 1.294269  |
| 44 | 1 | H | 6.477037   | -3.375921 | -1.416677 |
| 45 | 1 | H | 6.417188   | -1.440844 | 1.346962  |
| 46 | 1 | H | -4.742788  | -3.770502 | -8.581488 |
| 47 | 1 | H | -5.233431  | -0.940871 | -6.820025 |
| 48 | 1 | H | -2.563108  | -1.200371 | -8.842161 |
| 49 | 1 | H | -5.297963  | -3.698344 | -3.255936 |
| 50 | 1 | H | -5.022188  | 7.289416  | 3.091368  |
| 51 | 1 | H | -6.445746  | 7.753012  | 0.09165   |
| 52 | 1 | H | -2.266277  | 10.117235 | -0.713187 |
| 53 | 1 | H | 0.599503   | 8.357579  | -0.975159 |
| 54 | 1 | H | -0.744195  | 8.974327  | 2.072623  |
| 55 | 1 | H | -11.209094 | 0.420151  | 1.49583   |
| 56 | 1 | H | -8.823895  | -1.528851 | 0.190157  |
| 57 | 1 | H | -7.464739  | 4.670515  | -3.412417 |
| 58 | 1 | H | -7.737968  | 1.337141  | -3.859174 |
| 59 | 1 | H | -10.456612 | 3.125783  | -3.141604 |
| 60 | 1 | H | -4.499279  | -1.250794 | 2.33351   |
| 61 | 1 | H | -9.277981  | 0.770661  | 7.247778  |
| 62 | 1 | H | -7.196543  | -5.007197 | 5.766045  |
| 63 | 1 | H | -8.131034  | -4.616895 | 2.614542  |
| 64 | 1 | H | -3.020311  | 0.642337  | 6.294721  |
| 65 | 1 | H | -5.096151  | -1.315377 | 8.090093  |
| 66 | 1 | H | -2.472715  | -2.658901 | 6.488755  |
| 67 | 1 | H | -2.712339  | -6.118061 | 4.165665  |
| 68 | 1 | H | -5.065207  | -8.222128 | 3.042253  |
| 69 | 1 | H | -3.870504  | -5.828851 | 1.01671   |

| 4-3_en_       |               | Standard Orientation (A.U.) |            |           |           |
|---------------|---------------|-----------------------------|------------|-----------|-----------|
| Center number | Atomic number | Atomic Type                 | X          | Y         | Z         |
| 0             | 6             | C                           | -1.355967  | 0.243165  | -1.83226  |
| 1             | 6             | C                           | 0.832534   | 2.03013   | -1.051945 |
| 2             | 6             | C                           | 3.065658   | 1.489686  | -2.833798 |
| 3             | 8             | O                           | 4.394834   | -0.472164 | -1.857836 |
| 4             | 6             | C                           | 3.292984   | -1.306265 | 0.555283  |
| 5             | 6             | C                           | 1.196938   | -3.269298 | 0.055604  |
| 6             | 6             | C                           | -0.417533  | -2.432887 | -2.184002 |
| 7             | 6             | C                           | 1.969833   | 1.124532  | 1.449911  |
| 8             | 6             | C                           | 1.661604   | -6.044528 | -0.587888 |
| 9             | 6             | C                           | -1.03046   | -6.900611 | -1.362389 |
| 10            | 6             | C                           | -2.388316  | -4.56132  | -2.540219 |
| 11            | 6             | C                           | -0.003917  | 4.793895  | -1.058234 |
| 12            | 6             | C                           | -1.661284  | 5.699465  | -3.243018 |
| 13            | 8             | O                           | 0.603094   | 6.200821  | 0.645902  |
| 14            | 6             | C                           | 5.42096    | -2.246419 | 2.215532  |
| 15            | 8             | O                           | 3.580159   | 2.497787  | -4.798277 |
| 16            | 1             | H                           | 0.811642   | -2.510469 | -3.864555 |
| 17            | 6             | C                           | -3.110152  | -4.935409 | -5.307142 |
| 18            | 8             | O                           | -4.656161  | -4.074059 | -1.119113 |
| 19            | 1             | H                           | -0.003998  | -3.23733  | 1.762038  |
| 20            | 6             | C                           | -4.497235  | 6.020639  | -2.419664 |
| 21            | 6             | C                           | -0.612654  | 8.179271  | -4.301202 |
| 22            | 6             | C                           | -5.440629  | 4.547473  | -0.175443 |
| 23            | 6             | C                           | -5.388064  | 5.273798  | 2.288555  |
| 24            | 6             | C                           | -6.598339  | 3.361432  | 4.012885  |
| 25            | 6             | C                           | -7.135265  | 1.021214  | 2.377408  |
| 26            | 6             | C                           | -6.637413  | 2.040516  | -0.352574 |
| 27            | 6             | C                           | -4.332472  | 7.651709  | 3.354713  |
| 28            | 8             | O                           | -7.020227  | 0.848449  | -2.297286 |
| 29            | 6             | C                           | -9.828452  | -0.068017 | 2.741309  |
| 30            | 8             | O                           | -5.192936  | -0.756597 | 2.951744  |
| 31            | 6             | C                           | -10.466634 | -0.635788 | 5.535487  |
| 32            | 6             | C                           | -10.392332 | -2.359123 | 1.054527  |
| 33            | 6             | C                           | -9.052223  | -2.838933 | 6.765568  |
| 34            | 1             | H                           | -2.335731  | 0.922001  | -3.521974 |
| 35            | 1             | H                           | -2.673216  | 0.263928  | -0.251078 |
| 36            | 1             | H                           | 3.342028   | 2.51352   | 2.159003  |
| 37            | 1             | H                           | 0.539413   | 0.783887  | 2.913613  |
| 38            | 1             | H                           | 2.988693   | -6.201041 | -2.186516 |
| 39            | 1             | H                           | 2.422899   | -7.168552 | 0.986109  |

|    |   |   |            |           |           |
|----|---|---|------------|-----------|-----------|
| 40 | 1 | H | -2.112031  | -7.452805 | 0.3243    |
| 41 | 1 | H | -1.021275  | -8.527832 | -2.654437 |
| 42 | 1 | H | -1.567704  | 4.273888  | -4.743336 |
| 43 | 1 | H | 6.815674   | -0.741257 | 2.547442  |
| 44 | 1 | H | 4.657076   | -2.86471  | 4.049245  |
| 45 | 1 | H | 6.385273   | -3.860436 | 1.329609  |
| 46 | 1 | H | -4.517551  | -6.456697 | -5.483595 |
| 47 | 1 | H | -3.930764  | -3.190113 | -6.097987 |
| 48 | 1 | H | -1.445693  | -5.433665 | -6.449654 |
| 49 | 1 | H | -5.656444  | -2.819715 | -2.030425 |
| 50 | 1 | H | -4.802728  | 8.040847  | -2.032418 |
| 51 | 1 | H | -5.681052  | 5.534363  | -4.059102 |
| 52 | 1 | H | -1.839775  | 8.899237  | -5.819706 |
| 53 | 1 | H | 1.291248   | 7.886901  | -5.082904 |
| 54 | 1 | H | -0.494008  | 9.613128  | -2.800004 |
| 55 | 1 | H | -5.360464  | 2.866859  | 5.610216  |
| 56 | 1 | H | -8.335358  | 4.178838  | 4.824555  |
| 57 | 1 | H | -2.585622  | 7.21796   | 4.406347  |
| 58 | 1 | H | -3.832135  | 9.039519  | 1.898957  |
| 59 | 1 | H | -5.670334  | 8.501793  | 4.708141  |
| 60 | 1 | H | -11.115321 | 1.469872  | 2.149453  |
| 61 | 1 | H | -5.145937  | -2.124978 | 1.702223  |
| 62 | 1 | H | -10.174304 | 1.081477  | 6.677912  |
| 63 | 1 | H | -12.51701  | -1.014215 | 5.623562  |
| 64 | 1 | H | -9.010714  | -3.88859  | 1.326768  |
| 65 | 1 | H | -12.269657 | -3.130606 | 1.517017  |
| 66 | 1 | H | -10.376297 | -1.847061 | -0.953576 |
| 67 | 1 | H | -9.375772  | -4.622606 | 5.743367  |
| 68 | 1 | H | -7.004683  | -2.504592 | 6.794362  |
| 69 | 1 | H | -9.708913  | -3.118796 | 8.721611  |

| 4-4_en_       |               | Standard Orientation (A.U.) |            |           |           |
|---------------|---------------|-----------------------------|------------|-----------|-----------|
| Center number | Atomic number | Atomic Type                 | X          | Y         | Z         |
| 0             | 6             | C                           | 0.415991   | -0.544607 | 0.687453  |
| 1             | 6             | C                           | 1.393478   | 1.377043  | -1.33266  |
| 2             | 6             | C                           | 0.680465   | 0.345784  | -3.972922 |
| 3             | 8             | O                           | 2.574711   | -1.153598 | -4.794402 |
| 4             | 6             | C                           | 4.577336   | -1.318143 | -2.878448 |
| 5             | 6             | C                           | 3.896559   | -3.421587 | -0.996248 |
| 6             | 6             | C                           | 1.13384    | -3.198261 | -0.154121 |
| 7             | 6             | C                           | 4.275509   | 1.223397  | -1.501907 |
| 8             | 6             | C                           | 4.063487   | -6.218943 | -1.723098 |
| 9             | 6             | C                           | 2.334452   | -7.551507 | 0.252402  |
| 10            | 6             | C                           | 0.831979   | -5.429331 | 1.662952  |
| 11            | 6             | C                           | 0.337328   | 4.021254  | -0.892259 |
| 12            | 6             | C                           | -2.531083  | 4.294058  | -0.835077 |
| 13            | 8             | O                           | 1.722997   | 5.813165  | -0.555138 |
| 14            | 6             | C                           | 7.063814   | -1.698771 | -4.237325 |
| 15            | 8             | O                           | -1.213056  | 0.712694  | -5.171828 |
| 16            | 1             | H                           | -0.044932  | -3.684926 | -1.805628 |
| 17            | 6             | C                           | -1.912997  | -6.10411  | 2.223361  |
| 18            | 8             | O                           | 2.103736   | -4.721996 | 3.939225  |
| 19            | 1             | H                           | 5.085321   | -3.114745 | 0.685479  |
| 20            | 6             | C                           | -3.398535  | 4.747384  | 1.932172  |
| 21            | 6             | C                           | -3.380172  | 6.411699  | -2.607228 |
| 22            | 6             | C                           | -6.139496  | 4.136754  | 2.227893  |
| 23            | 6             | C                           | -8.190625  | 5.669247  | 2.329756  |
| 24            | 6             | C                           | -10.612353 | 4.18526   | 2.61675   |
| 25            | 6             | C                           | -9.871472  | 1.397458  | 2.131249  |
| 26            | 6             | C                           | -6.966947  | 1.477328  | 2.362163  |
| 27            | 6             | C                           | -8.236827  | 8.483141  | 2.220716  |
| 28            | 8             | O                           | -5.61434   | -0.370601 | 2.557104  |
| 29            | 6             | C                           | -10.620473 | 0.467967  | -0.567772 |
| 30            | 8             | O                           | -10.831112 | -0.225753 | 4.019782  |
| 31            | 6             | C                           | -9.606169  | -2.173593 | -1.283416 |
| 32            | 6             | C                           | -9.883201  | 2.324335  | -2.671014 |
| 33            | 6             | C                           | -10.264193 | -4.39709  | 0.436498  |
| 34            | 1             | H                           | -1.633833  | -0.39551  | 0.953366  |
| 35            | 1             | H                           | 1.322827   | -0.100946 | 2.505072  |
| 36            | 1             | H                           | 5.025628   | 2.790555  | -2.64212  |
| 37            | 1             | H                           | 5.205744   | 1.254056  | 0.351483  |
| 38            | 1             | H                           | 3.310815   | -6.484717 | -3.645729 |
| 39            | 1             | H                           | 6.007084   | -6.953345 | -1.70473  |

|    |   |   |            |           |           |
|----|---|---|------------|-----------|-----------|
| 40 | 1 | H | 3.446278   | -8.622679 | 1.645291  |
| 41 | 1 | H | 1.039912   | -8.894892 | -0.66533  |
| 42 | 1 | H | -3.356364  | 2.508747  | -1.491419 |
| 43 | 1 | H | 7.047579   | -3.465447 | -5.331428 |
| 44 | 1 | H | 7.437693   | -0.119848 | -5.536759 |
| 45 | 1 | H | 8.611065   | -1.800528 | -2.850491 |
| 46 | 1 | H | -2.925438  | -6.618089 | 0.480063  |
| 47 | 1 | H | -2.020249  | -7.738088 | 3.516108  |
| 48 | 1 | H | -2.907919  | -4.500866 | 3.094652  |
| 49 | 1 | H | 1.856707   | -6.055629 | 5.160042  |
| 50 | 1 | H | -2.330497  | 3.498421  | 3.209056  |
| 51 | 1 | H | -2.959024  | 6.703664  | 2.479178  |
| 52 | 1 | H | -5.435166  | 6.698337  | -2.470398 |
| 53 | 1 | H | -2.928894  | 5.928811  | -4.577602 |
| 54 | 1 | H | -2.419346  | 8.190808  | -2.121729 |
| 55 | 1 | H | -11.313513 | 4.329863  | 4.57389   |
| 56 | 1 | H | -12.126557 | 4.897445  | 1.375829  |
| 57 | 1 | H | -9.34132   | 9.116748  | 0.567738  |
| 58 | 1 | H | -9.19736   | 9.265183  | 3.898802  |
| 59 | 1 | H | -6.339478  | 9.312128  | 2.089433  |
| 60 | 1 | H | -12.715358 | 0.365239  | -0.512344 |
| 61 | 1 | H | -12.448077 | -0.862743 | 3.465433  |
| 62 | 1 | H | -10.326629 | -2.566706 | -3.20091  |
| 63 | 1 | H | -7.535916  | -2.057824 | -1.47183  |
| 64 | 1 | H | -10.681076 | 1.688865  | -4.482694 |
| 65 | 1 | H | -10.567499 | 4.255768  | -2.334165 |
| 66 | 1 | H | -7.819198  | 2.409775  | -2.909432 |
| 67 | 1 | H | -9.641003  | -6.181226 | -0.437735 |
| 68 | 1 | H | -9.344721  | -4.217095 | 2.285086  |
| 69 | 1 | H | -12.323541 | -4.557451 | 0.739253  |

| 4-5_en_       |               | Standard Orientation (A.U.) |            |           |           |
|---------------|---------------|-----------------------------|------------|-----------|-----------|
| Center number | Atomic number | Atomic Type                 | X          | Y         | Z         |
| 0             | 6             | C                           | -1.014256  | -0.101346 | -0.937963 |
| 1             | 6             | C                           | 1.050556   | 1.993502  | -1.116427 |
| 2             | 6             | C                           | 2.5272     | 1.530751  | -3.588475 |
| 3             | 8             | O                           | 4.436237   | -0.090912 | -3.086886 |
| 4             | 6             | C                           | 4.424177   | -0.819956 | -0.404416 |
| 5             | 6             | C                           | 2.638217   | -3.078813 | -0.030678 |
| 6             | 6             | C                           | 0.15769    | -2.672005 | -1.455532 |
| 7             | 6             | C                           | 3.143437   | 1.482779  | 0.813468  |
| 8             | 6             | C                           | 3.324408   | -5.766329 | -0.835274 |
| 9             | 6             | C                           | 0.734431   | -7.14068  | -0.713587 |
| 10            | 6             | C                           | -1.37546   | -5.07457  | -0.8282   |
| 11            | 6             | C                           | -0.06963   | 4.644552  | -0.936948 |
| 12            | 6             | C                           | -2.209484  | 5.408146  | -2.715328 |
| 13            | 8             | O                           | 0.707262   | 6.113427  | 0.645388  |
| 14            | 6             | C                           | 7.131043   | -1.294863 | 0.382143  |
| 15            | 8             | O                           | 2.109552   | 2.367044  | -5.655082 |
| 16            | 1             | H                           | 0.603648   | -2.784378 | -3.489662 |
| 17            | 6             | C                           | -3.408705  | -5.627374 | -2.80302  |
| 18            | 8             | O                           | -2.455691  | -4.887725 | 1.627891  |
| 19            | 1             | H                           | 2.183527   | -3.131615 | 2.00399   |
| 20            | 6             | C                           | -4.551374  | 6.163645  | -1.127584 |
| 21            | 6             | C                           | -1.327704  | 7.603677  | -4.389165 |
| 22            | 6             | C                           | -5.468871  | 4.090941  | 0.573265  |
| 23            | 6             | C                           | -4.966468  | 3.660907  | 3.055552  |
| 24            | 6             | C                           | -6.036898  | 1.169928  | 3.964517  |
| 25            | 6             | C                           | -7.746387  | 0.239026  | 1.81023   |
| 26            | 6             | C                           | -6.896898  | 1.92653   | -0.41568  |
| 27            | 6             | C                           | -3.460705  | 5.256633  | 4.817885  |
| 28            | 8             | O                           | -7.274593  | 1.376377  | -2.620606 |
| 29            | 6             | C                           | -10.616811 | 0.629446  | 2.342452  |
| 30            | 8             | O                           | -7.197349  | -2.318859 | 1.164457  |
| 31            | 6             | C                           | -11.525444 | -0.468767 | 4.889206  |
| 32            | 6             | C                           | -12.252113 | -0.329834 | 0.148072  |
| 33            | 6             | C                           | -11.088028 | -3.293895 | 5.318968  |
| 34            | 1             | H                           | -2.552771  | 0.275195  | -2.273114 |
| 35            | 1             | H                           | -1.796733  | -0.067662 | 0.981996  |
| 36            | 1             | H                           | 4.434677   | 3.106112  | 0.918857  |
| 37            | 1             | H                           | 2.425176   | 1.091017  | 2.719987  |
| 38            | 1             | H                           | 4.069774   | -5.745771 | -2.77996  |
| 39            | 1             | H                           | 4.753957   | -6.659991 | 0.380175  |

|    |   |   |            |           |           |
|----|---|---|------------|-----------|-----------|
| 40 | 1 | H | 0.501664   | -8.145354 | 1.088418  |
| 41 | 1 | H | 0.52523    | -8.535473 | -2.239861 |
| 42 | 1 | H | -2.713708  | 3.808028  | -3.933597 |
| 43 | 1 | H | 8.286513   | 0.409224  | 0.096674  |
| 44 | 1 | H | 7.196768   | -1.818069 | 2.394619  |
| 45 | 1 | H | 7.957139   | -2.847306 | -0.724613 |
| 46 | 1 | H | -4.518994  | -7.29822  | -2.251294 |
| 47 | 1 | H | -4.700141  | -4.007332 | -3.010067 |
| 48 | 1 | H | -2.561889  | -5.981745 | -4.668864 |
| 49 | 1 | H | -4.076528  | -4.017553 | 1.511566  |
| 50 | 1 | H | -4.079843  | 7.857215  | -0.018943 |
| 51 | 1 | H | -6.071965  | 6.675247  | -2.453502 |
| 52 | 1 | H | -0.705855  | 9.203384  | -3.21414  |
| 53 | 1 | H | -2.883359  | 8.242014  | -5.613983 |
| 54 | 1 | H | 0.250183   | 7.002421  | -5.598128 |
| 55 | 1 | H | -4.495169  | -0.200932 | 4.271344  |
| 56 | 1 | H | -7.005202  | 1.37979   | 5.789751  |
| 57 | 1 | H | -1.817529  | 4.179028  | 5.516252  |
| 58 | 1 | H | -2.742232  | 6.983948  | 3.92888   |
| 59 | 1 | H | -4.601586  | 5.747042  | 6.49408   |
| 60 | 1 | H | -10.876611 | 2.698103  | 2.465373  |
| 61 | 1 | H | -7.715889  | -2.526588 | -0.585227 |
| 62 | 1 | H | -10.663441 | 0.598253  | 6.457182  |
| 63 | 1 | H | -13.567468 | -0.063674 | 5.023334  |
| 64 | 1 | H | -12.135402 | -2.399163 | -0.031011 |
| 65 | 1 | H | -14.247642 | 0.148507  | 0.487007  |
| 66 | 1 | H | -11.686106 | 0.496689  | -1.669579 |
| 67 | 1 | H | -11.957941 | -4.449846 | 3.824395  |
| 68 | 1 | H | -9.066879  | -3.771083 | 5.355748  |
| 69 | 1 | H | -11.925169 | -3.884202 | 7.131079  |

| 4-6_en_       |               | Standard Orientation (A.U.) |            |           |           |
|---------------|---------------|-----------------------------|------------|-----------|-----------|
| Center number | Atomic number | Atomic Type                 | X          | Y         | Z         |
| 0             | 6             | C                           | -0.591466  | -0.368488 | -0.448962 |
| 1             | 6             | C                           | 1.331821   | 1.740343  | -1.214638 |
| 2             | 6             | C                           | 2.135973   | 1.222032  | -3.96587  |
| 3             | 8             | O                           | 4.142673   | -0.370778 | -3.921855 |
| 4             | 6             | C                           | 4.834319   | -1.002085 | -1.315691 |
| 5             | 6             | C                           | 3.255106   | -3.277445 | -0.442199 |
| 6             | 6             | C                           | 0.467911   | -2.944917 | -1.157393 |
| 7             | 6             | C                           | 3.853469   | 1.311386  | 0.135481  |
| 8             | 6             | C                           | 3.76803    | -5.970445 | -1.358335 |
| 9             | 6             | C                           | 1.299178   | -7.393781 | -0.639232 |
| 10            | 6             | C                           | -0.779523  | -5.354343 | -0.094406 |
| 11            | 6             | C                           | 0.194313   | 4.342714  | -0.730091 |
| 12            | 6             | C                           | -2.075308  | 5.21499   | -2.275739 |
| 13            | 8             | O                           | 1.072589   | 5.662127  | 0.929559  |
| 14            | 6             | C                           | 7.662368   | -1.416399 | -1.231851 |
| 15            | 8             | O                           | 1.207201   | 1.977464  | -5.889741 |
| 16            | 1             | H                           | 0.375129   | -3.131163 | -3.231933 |
| 17            | 6             | C                           | -3.329012  | -5.960267 | -1.269036 |
| 18            | 8             | O                           | -1.249777  | -5.097589 | 2.557319  |
| 19            | 1             | H                           | 3.410339   | -3.270846 | 1.643649  |
| 20            | 6             | C                           | -4.24649   | 5.977263  | -0.475139 |
| 21            | 6             | C                           | -1.258543  | 7.44193   | -3.947155 |
| 22            | 6             | C                           | -5.353939  | 3.769762  | 0.909356  |
| 23            | 6             | C                           | -4.855348  | 2.838383  | 3.249611  |
| 24            | 6             | C                           | -6.237176  | 0.380959  | 3.748714  |
| 25            | 6             | C                           | -8.215657  | 0.200485  | 1.620943  |
| 26            | 6             | C                           | -7.082823  | 2.005687  | -0.359003 |
| 27            | 6             | C                           | -3.109669  | 3.900847  | 5.188042  |
| 28            | 8             | O                           | -7.505935  | 1.820019  | -2.616243 |
| 29            | 6             | C                           | -10.871592 | 1.196023  | 2.450393  |
| 30            | 8             | O                           | -8.37546   | -2.243115 | 0.550443  |
| 31            | 6             | C                           | -11.935478 | -0.103323 | 4.836332  |
| 32            | 6             | C                           | -12.762836 | 1.082009  | 0.258282  |
| 33            | 6             | C                           | -12.280597 | -2.970743 | 4.70904   |
| 34            | 1             | H                           | -2.418804  | -0.050573 | -1.377671 |
| 35            | 1             | H                           | -0.894268  | -0.257598 | 1.602389  |
| 36            | 1             | H                           | 5.101949   | 2.951374  | -0.128168 |
| 37            | 1             | H                           | 3.651366   | 0.977445  | 2.172376  |
| 38            | 1             | H                           | 4.036858   | -5.954913 | -3.422146 |
| 39            | 1             | H                           | 5.462884   | -6.824633 | -0.511952 |



|    |   |   |            |           |           |
|----|---|---|------------|-----------|-----------|
| 40 | 1 | H | 1.540625   | -8.555217 | 1.069702  |
| 41 | 1 | H | 0.694827   | -8.683065 | -2.152133 |
| 42 | 1 | H | -2.717527  | 3.674558  | -3.506648 |
| 43 | 1 | H | 8.667479   | 0.294112  | -1.851262 |
| 44 | 1 | H | 8.255302   | -1.86905  | 0.710336  |
| 45 | 1 | H | 8.214535   | -2.990486 | -2.470953 |
| 46 | 1 | H | -4.025024  | -7.784717 | -0.552677 |
| 47 | 1 | H | -4.731285  | -4.514489 | -0.762896 |
| 48 | 1 | H | -3.172166  | -6.072961 | -3.339353 |
| 49 | 1 | H | 0.34737    | -4.946154 | 3.426249  |
| 50 | 1 | H | -3.543965  | 7.416059  | 0.84996   |
| 51 | 1 | H | -5.740363  | 6.852974  | -1.630121 |
| 52 | 1 | H | -2.878962  | 8.129804  | -5.054838 |
| 53 | 1 | H | 0.224513   | 6.854535  | -5.277104 |
| 54 | 1 | H | -0.539376  | 9.004272  | -2.776938 |
| 55 | 1 | H | -4.916684  | -1.228486 | 3.596405  |
| 56 | 1 | H | -7.029938  | 0.324391  | 5.667799  |
| 57 | 1 | H | -2.102617  | 5.587883  | 4.528218  |
| 58 | 1 | H | -4.167679  | 4.356617  | 6.927868  |
| 59 | 1 | H | -1.689614  | 2.472765  | 5.730208  |
| 60 | 1 | H | -10.59383  | 3.20455   | 2.949359  |
| 61 | 1 | H | -8.633243  | -1.973451 | -1.249686 |
| 62 | 1 | H | -10.737041 | 0.366422  | 6.474673  |
| 63 | 1 | H | -13.776522 | 0.791581  | 5.241859  |
| 64 | 1 | H | -13.119333 | -0.883705 | -0.31624  |
| 65 | 1 | H | -14.581985 | 1.912043  | 0.833459  |
| 66 | 1 | H | -12.082057 | 2.109408  | -1.412807 |
| 67 | 1 | H | -13.115715 | -3.676035 | 6.481334  |
| 68 | 1 | H | -13.549712 | -3.525385 | 3.156852  |
| 69 | 1 | H | -10.47753  | -3.952176 | 4.396884  |

| 4-7_en_       |               | Standard Orientation (A.U.) |            |           |           |
|---------------|---------------|-----------------------------|------------|-----------|-----------|
| Center number | Atomic number | Atomic Type                 | X          | Y         | Z         |
| 0             | 6             | C                           | -0.159778  | -1.660696 | -1.02248  |
| 1             | 6             | C                           | 1.472313   | 0.766027  | -1.323936 |
| 2             | 6             | C                           | 2.182709   | 1.000919  | -4.156336 |
| 3             | 8             | O                           | 4.360169   | -0.273147 | -4.562484 |
| 4             | 6             | C                           | 5.250718   | -1.445873 | -2.216966 |
| 5             | 6             | C                           | 3.968641   | -4.028063 | -1.911721 |
| 6             | 6             | C                           | 1.121101   | -3.834019 | -2.418871 |
| 7             | 6             | C                           | 4.115984   | 0.317328  | -0.212208 |
| 8             | 6             | C                           | 4.705944   | -6.29278  | -3.557473 |
| 9             | 6             | C                           | 2.384107   | -8.087774 | -3.342943 |
| 10            | 6             | C                           | 0.233449   | -6.560187 | -2.012573 |
| 11            | 6             | C                           | 0.287826   | 3.238821  | -0.343379 |
| 12            | 6             | C                           | -2.559533  | 3.399699  | 0.013814  |
| 13            | 8             | O                           | 1.645832   | 5.027067  | 0.106384  |
| 14            | 6             | C                           | 8.107544   | -1.537067 | -2.3016   |
| 15            | 8             | O                           | 1.029386   | 2.037412  | -5.809095 |
| 16            | 1             | H                           | 0.900794   | -3.488001 | -4.464344 |
| 17            | 6             | C                           | -2.39731   | -7.108948 | -3.051344 |
| 18            | 8             | O                           | 0.275578   | -6.970449 | 0.655006  |
| 19            | 1             | H                           | 4.211569   | -4.572565 | 0.08244   |
| 20            | 6             | C                           | -3.234729  | 5.459147  | 1.956511  |
| 21            | 6             | C                           | -3.83266   | 3.871568  | -2.557821 |
| 22            | 6             | C                           | -5.955809  | 5.337631  | 2.703703  |
| 23            | 6             | C                           | -7.889709  | 6.954436  | 2.229894  |
| 24            | 6             | C                           | -10.328627 | 6.120702  | 3.462781  |
| 25            | 6             | C                           | -9.803407  | 3.453297  | 4.493438  |
| 26            | 6             | C                           | -6.907833  | 3.241364  | 4.262613  |
| 27            | 6             | C                           | -7.795141  | 9.336858  | 0.7311    |
| 28            | 8             | O                           | -5.670464  | 1.60563   | 5.312662  |
| 29            | 6             | C                           | -11.163693 | 1.362667  | 2.921461  |
| 30            | 8             | O                           | -10.484798 | 3.30219   | 7.076246  |
| 31            | 6             | C                           | -10.892074 | -1.255633 | 4.154784  |
| 32            | 6             | C                           | -10.33237  | 1.343266  | 0.148465  |
| 33            | 6             | C                           | -12.472053 | -3.323354 | 2.90043   |
| 34            | 1             | H                           | -2.065637  | -1.355857 | -1.788888 |
| 35            | 1             | H                           | -0.348417  | -2.110263 | 0.999102  |
| 36            | 1             | H                           | 5.14599    | 2.117678  | -0.126061 |
| 37            | 1             | H                           | 4.072237   | -0.536444 | 1.679315  |
| 38            | 1             | H                           | 4.967192   | -5.671276 | -5.526686 |
| 39            | 1             | H                           | 6.472723   | -7.198837 | -2.946985 |

|    |   |   |            |           |           |
|----|---|---|------------|-----------|-----------|
| 40 | 1 | H | 2.814958   | -9.776312 | -2.207362 |
| 41 | 1 | H | 1.769957   | -8.752308 | -5.214892 |
| 42 | 1 | H | -3.217208  | 1.576337  | 0.766142  |
| 43 | 1 | H | 8.762907   | -2.673701 | -3.913032 |
| 44 | 1 | H | 8.894154   | 0.378514  | -2.480343 |
| 45 | 1 | H | 8.835425   | -2.397212 | -0.552968 |
| 46 | 1 | H | -2.521328  | -6.659662 | -5.078783 |
| 47 | 1 | H | -2.879904  | -9.124246 | -2.817998 |
| 48 | 1 | H | -3.822714  | -5.987136 | -2.03349  |
| 49 | 1 | H | -0.240192  | -8.691518 | 0.975986  |
| 50 | 1 | H | -2.078951  | 5.15701   | 3.661269  |
| 51 | 1 | H | -2.715902  | 7.322423  | 1.201552  |
| 52 | 1 | H | -3.195831  | 5.689231  | -3.344073 |
| 53 | 1 | H | -5.8963    | 3.935538  | -2.326967 |
| 54 | 1 | H | -3.352379  | 2.413952  | -3.953787 |
| 55 | 1 | H | -10.795506 | 7.372241  | 5.062142  |
| 56 | 1 | H | -11.934993 | 6.207073  | 2.138467  |
| 57 | 1 | H | -8.48235   | 10.945438 | 1.866387  |
| 58 | 1 | H | -5.887573  | 9.772484  | 0.041312  |
| 59 | 1 | H | -9.070783  | 9.195141  | -0.914361 |
| 60 | 1 | H | -13.188427 | 1.877307  | 2.99877   |
| 61 | 1 | H | -9.328104  | 2.102896  | 7.840525  |
| 62 | 1 | H | -8.882599  | -1.805542 | 4.177097  |
| 63 | 1 | H | -11.478694 | -1.084455 | 6.142706  |
| 64 | 1 | H | -11.537867 | 0.081347  | -0.978661 |
| 65 | 1 | H | -10.435052 | 3.226483  | -0.726225 |
| 66 | 1 | H | -8.371672  | 0.667249  | -0.044973 |
| 67 | 1 | H | -14.482327 | -2.780718 | 2.795512  |
| 68 | 1 | H | -11.835088 | -3.740357 | 0.963611  |
| 69 | 1 | H | -12.358594 | -5.098453 | 3.980964  |

| 4-8_en_       |               | Standard Orientation (A.U.) |            |           |           |
|---------------|---------------|-----------------------------|------------|-----------|-----------|
| Center number | Atomic number | Atomic Type                 | X          | Y         | Z         |
| 0             | 6             | C                           | -0.853559  | -1.333422 | -0.977239 |
| 1             | 6             | C                           | 0.336396   | 1.361438  | -0.794319 |
| 2             | 6             | C                           | 0.107936   | 2.553586  | -3.434947 |
| 3             | 8             | O                           | 2.203701   | 1.97622   | -4.778244 |
| 4             | 6             | C                           | 3.88518    | 0.344189  | -3.296958 |
| 5             | 6             | C                           | 3.045927   | -2.410684 | -3.618813 |
| 6             | 6             | C                           | 0.171514   | -2.663853 | -3.316417 |
| 7             | 6             | C                           | 3.230861   | 1.124442  | -0.579791 |
| 8             | 6             | C                           | 3.509331   | -3.857165 | -6.081731 |
| 9             | 6             | C                           | 1.590781   | -6.082532 | -5.937991 |
| 10            | 6             | C                           | -0.23339   | -5.508752 | -3.684361 |
| 11            | 6             | C                           | -0.807059  | 2.793251  | 1.450084  |
| 12            | 6             | C                           | -1.590874  | 5.545413  | 1.163634  |
| 13            | 8             | O                           | -0.98194   | 1.688327  | 3.449571  |
| 14            | 6             | C                           | 6.575833   | 0.874618  | -4.117109 |
| 15            | 8             | O                           | -1.634173  | 3.706394  | -4.332656 |
| 16            | 1             | H                           | -0.688858  | -1.77273  | -4.994942 |
| 17            | 6             | C                           | -2.968586  | -6.253057 | -4.18804  |
| 18            | 8             | O                           | 0.641007   | -6.68585  | -1.418747 |
| 19            | 1             | H                           | 3.930013   | -3.480338 | -2.067334 |
| 20            | 6             | C                           | -3.546626  | 6.278535  | 3.181437  |
| 21            | 6             | C                           | 0.768858   | 7.243296  | 1.245491  |
| 22            | 6             | C                           | -5.855477  | 4.639713  | 3.071678  |
| 23            | 6             | C                           | -7.578138  | 4.397447  | 1.187058  |
| 24            | 6             | C                           | -9.637877  | 2.522215  | 1.843438  |
| 25            | 6             | C                           | -8.61176   | 1.110147  | 4.175629  |
| 26            | 6             | C                           | -6.630777  | 2.98999   | 5.170363  |
| 27            | 6             | C                           | -7.575935  | 5.748396  | -1.290861 |
| 28            | 8             | O                           | -6.016043  | 3.101715  | 7.381048  |
| 29            | 6             | C                           | -7.348453  | -1.426424 | 3.358109  |
| 30            | 8             | O                           | -10.438944 | 0.694841  | 6.06887   |
| 31            | 6             | C                           | -9.406901  | -3.384204 | 2.723703  |
| 32            | 6             | C                           | -5.501607  | -2.439114 | 5.342851  |
| 33            | 6             | C                           | -8.467321  | -5.572798 | 1.091788  |
| 34            | 1             | H                           | -2.92481   | -1.161377 | -1.064301 |
| 35            | 1             | H                           | -0.38114   | -2.368042 | 0.757358  |
| 36            | 1             | H                           | 4.102012   | 2.954242  | -0.11513  |
| 37            | 1             | H                           | 3.811869   | -0.269458 | 0.840168  |
| 38            | 1             | H                           | 3.081656   | -2.627871 | -7.706102 |
| 39            | 1             | H                           | 5.471457   | -4.508501 | -6.286178 |

|    |   |   |            |           |           |
|----|---|---|------------|-----------|-----------|
| 40 | 1 | H | 2.54291    | -7.897714 | -5.586992 |
| 41 | 1 | H | 0.531287   | -6.281785 | -7.715608 |
| 42 | 1 | H | -2.4413    | 5.742381  | -0.7172   |
| 43 | 1 | H | 7.891778   | -0.310657 | -3.026092 |
| 44 | 1 | H | 6.826797   | 0.447055  | -6.134693 |
| 45 | 1 | H | 7.059269   | 2.8719    | -3.801825 |
| 46 | 1 | H | -3.120518  | -8.297118 | -4.571633 |
| 47 | 1 | H | -4.146724  | -5.823645 | -2.531904 |
| 48 | 1 | H | -3.73912   | -5.242881 | -5.835257 |
| 49 | 1 | H | 0.41666    | -8.4891   | -1.590171 |
| 50 | 1 | H | -2.720635  | 6.111387  | 5.081782  |
| 51 | 1 | H | -4.048651  | 8.281825  | 2.893895  |
| 52 | 1 | H | 1.797692   | 7.001204  | 3.038631  |
| 53 | 1 | H | 0.209079   | 9.240349  | 1.086973  |
| 54 | 1 | H | 2.073433   | 6.839452  | -0.323101 |
| 55 | 1 | H | -11.393935 | 3.519535  | 2.360525  |
| 56 | 1 | H | -10.090087 | 1.282821  | 0.23249   |
| 57 | 1 | H | -6.578062  | 4.608256  | -2.727631 |
| 58 | 1 | H | -9.512556  | 6.070292  | -1.980087 |
| 59 | 1 | H | -6.592157  | 7.576633  | -1.185368 |
| 60 | 1 | H | -6.270833  | -1.016551 | 1.617229  |
| 61 | 1 | H | -9.581886  | 1.072607  | 7.650872  |
| 62 | 1 | H | -10.207646 | -4.091747 | 4.50975   |
| 63 | 1 | H | -10.99139  | -2.453678 | 1.741817  |
| 64 | 1 | H | -3.836793  | -1.21871  | 5.544414  |
| 65 | 1 | H | -6.436801  | -2.581469 | 7.196691  |
| 66 | 1 | H | -4.830072  | -4.338328 | 4.824649  |
| 67 | 1 | H | -6.852911  | -6.560529 | 1.958727  |
| 68 | 1 | H | -9.966117  | -6.983423 | 0.779606  |
| 69 | 1 | H | -7.849815  | -4.894742 | -0.779296 |

| 4-9_en_       |               | Standard Orientation (A.U.) |            |           |           |
|---------------|---------------|-----------------------------|------------|-----------|-----------|
| Center number | Atomic number | Atomic Type                 | X          | Y         | Z         |
| 0             | 6             | C                           | -1.229311  | -0.239418 | -1.207842 |
| 1             | 6             | C                           | 0.816457   | 1.844357  | -1.572353 |
| 2             | 6             | C                           | 2.419682   | 1.114947  | -3.891889 |
| 3             | 8             | O                           | 4.31718    | -0.411476 | -3.102093 |
| 4             | 6             | C                           | 4.165708   | -0.818934 | -0.360614 |
| 5             | 6             | C                           | 2.394841   | -3.067979 | 0.160359  |
| 6             | 6             | C                           | -0.016557  | -2.827367 | -1.415225 |
| 7             | 6             | C                           | 2.803886   | 1.596869  | 0.512041  |
| 8             | 6             | C                           | 3.178529   | -5.797281 | -0.400627 |
| 9             | 6             | C                           | 0.610514   | -7.231808 | -0.551644 |
| 10            | 6             | C                           | -1.525416  | -5.197186 | -0.727743 |
| 11            | 6             | C                           | -0.418946  | 4.444225  | -1.780522 |
| 12            | 6             | C                           | -2.485358  | 4.803202  | -3.761835 |
| 13            | 8             | O                           | 0.191957   | 6.142639  | -0.367263 |
| 14            | 6             | C                           | 6.82867    | -1.154857 | 0.625215  |
| 15            | 8             | O                           | 2.110113   | 1.674239  | -6.068296 |
| 16            | 1             | H                           | 0.5399     | -3.121967 | -3.403707 |
| 17            | 6             | C                           | -3.631445  | -5.81675  | -2.591724 |
| 18            | 8             | O                           | -2.613152  | -4.757051 | 1.728225  |
| 19            | 1             | H                           | 1.855182   | -2.940902 | 2.168582  |
| 20            | 6             | C                           | -5.01364   | 5.632587  | -2.515831 |
| 21            | 6             | C                           | -1.615665  | 6.768314  | -5.708929 |
| 22            | 6             | C                           | -5.701408  | 4.3976    | -0.055467 |
| 23            | 6             | C                           | -5.560378  | 5.41058   | 2.300101  |
| 24            | 6             | C                           | -6.566366  | 3.649557  | 4.299938  |
| 25            | 6             | C                           | -7.01538   | 1.107589  | 2.963351  |
| 26            | 6             | C                           | -6.697413  | 1.803849  | 0.121816  |
| 27            | 6             | C                           | -4.572113  | 7.944351  | 3.020694  |
| 28            | 8             | O                           | -7.113067  | 0.377586  | -1.641772 |
| 29            | 6             | C                           | -9.606157  | -0.114262 | 3.558641  |
| 30            | 8             | O                           | -4.965331  | -0.446895 | 3.733035  |
| 31            | 6             | C                           | -9.741124  | -2.884935 | 2.686252  |
| 32            | 6             | C                           | -11.788977 | 1.46045   | 2.482295  |
| 33            | 6             | C                           | -12.128219 | -4.271777 | 3.535833  |
| 34            | 1             | H                           | -2.750283  | -0.043383 | -2.594088 |
| 35            | 1             | H                           | -2.042678  | 0.03461   | 0.677282  |
| 36            | 1             | H                           | 4.087579   | 3.230753  | 0.493905  |
| 37            | 1             | H                           | 1.975829   | 1.42841   | 2.406444  |
| 38            | 1             | H                           | 4.16082    | -5.87655  | -2.2339   |
| 39            | 1             | H                           | 4.452889   | -6.600696 | 1.030035  |

|    |   |   |            |           |           |
|----|---|---|------------|-----------|-----------|
| 40 | 1 | H | 0.295051   | -8.403724 | 1.138168  |
| 41 | 1 | H | 0.549267   | -8.507432 | -2.191708 |
| 42 | 1 | H | -2.779246  | 3.008151  | -4.754022 |
| 43 | 1 | H | 7.734768   | -2.813997 | -0.237845 |
| 44 | 1 | H | 7.979947   | 0.522476  | 0.199644  |
| 45 | 1 | H | 6.785215   | -1.427504 | 2.687143  |
| 46 | 1 | H | -2.880893  | -6.06067  | -4.515993 |
| 47 | 1 | H | -4.597542  | -7.585019 | -2.056322 |
| 48 | 1 | H | -5.037471  | -4.284164 | -2.61124  |
| 49 | 1 | H | -3.367723  | -6.315845 | 2.308882  |
| 50 | 1 | H | -4.956387  | 7.691553  | -2.241223 |
| 51 | 1 | H | -6.525365  | 5.24367   | -3.894734 |
| 52 | 1 | H | -3.133805  | 7.138365  | -7.083799 |
| 53 | 1 | H | 0.048855   | 6.079771  | -6.741512 |
| 54 | 1 | H | -1.134002  | 8.555946  | -4.75969  |
| 55 | 1 | H | -5.204836  | 3.383092  | 5.850293  |
| 56 | 1 | H | -8.300241  | 4.445199  | 5.141707  |
| 57 | 1 | H | -2.979385  | 7.709864  | 4.345494  |
| 58 | 1 | H | -3.877397  | 9.029914  | 1.39892   |
| 59 | 1 | H | -6.031663  | 9.042159  | 4.029132  |
| 60 | 1 | H | -9.749193  | -0.111897 | 5.645075  |
| 61 | 1 | H | -4.732751  | -1.919094 | 2.64934   |
| 62 | 1 | H | -9.566733  | -2.949378 | 0.613199  |
| 63 | 1 | H | -8.087414  | -3.890591 | 3.45214   |
| 64 | 1 | H | -13.619293 | 0.81968   | 3.228091  |
| 65 | 1 | H | -11.609302 | 3.477736  | 2.959693  |
| 66 | 1 | H | -11.85837  | 1.304     | 0.408317  |
| 67 | 1 | H | -13.846185 | -3.483819 | 2.665789  |
| 68 | 1 | H | -12.045724 | -6.28567  | 3.014905  |
| 69 | 1 | H | -12.369218 | -4.166658 | 5.60442   |

**Table S6.** Gibbs free energies<sup>a</sup> and equilibrium populations<sup>b</sup> of low-energy conformers of **2**.

| Conformers    | $\Delta G$ (a.u.) | P(%)/100 | G(a.u.)      |
|---------------|-------------------|----------|--------------|
| <b>2-1_en</b> | 0.0               | 27.27    | -1538.588163 |
| <b>2-2_en</b> | 0.00287           | 1.31     | -1538.585295 |
| <b>2-3_en</b> | 0.00289           | 1.28     | -1538.585274 |
| <b>2-4_en</b> | 0.00053           | 15.51    | -1538.58763  |
| <b>2-5_en</b> | 3e-05             | 26.27    | -1538.588128 |
| <b>2-6_en</b> | 0.00107           | 8.77     | -1538.587091 |
| <b>2-7_en</b> | 0.00274           | 1.5      | -1538.585425 |
| <b>2-8_en</b> | 0.00089           | 10.65    | -1538.587275 |
| <b>2-9_en</b> | 0.00122           | 7.45     | -1538.586938 |

<sup>a</sup>wB97M-V/def2-TZVP, in a.u.

<sup>b</sup>From  $\Delta G$  values at 298.15K.



**Table S7.** G Cartesian coordinates for the low-energy reoptimized random research conformers of **2** at B3LYP-D3(BJ)/6-31G\* level of theory in methanol.

| 2-1_en_       |               | Standard Orientation (A.U.) |            |           |           |
|---------------|---------------|-----------------------------|------------|-----------|-----------|
| Center number | Atomic number | Atomic Type                 | X          | Y         | Z         |
| 0             | 6             | C                           | 4.785339   | 1.48788   | 0.32564   |
| 1             | 6             | C                           | 3.013605   | -0.279552 | -1.207737 |
| 2             | 6             | C                           | 3.589032   | -3.015959 | -0.386767 |
| 3             | 8             | O                           | 5.433507   | -3.957414 | -1.873632 |
| 4             | 6             | C                           | 6.304754   | -2.031559 | -3.667689 |
| 5             | 6             | C                           | 8.315119   | -0.3895   | -2.377435 |
| 6             | 6             | C                           | 7.463866   | 0.428239  | 0.269007  |
| 7             | 6             | C                           | 3.917865   | -0.396706 | -3.972949 |
| 8             | 6             | C                           | 10.980581  | -1.387096 | -1.859532 |
| 9             | 6             | C                           | 12.006698  | 0.45983   | 0.18476   |
| 10            | 6             | C                           | 9.723118   | 2.033281  | 1.165483  |
| 11            | 6             | C                           | 0.235425   | 0.479791  | -0.912927 |
| 12            | 6             | C                           | -1.805567  | -1.206119 | -2.063279 |
| 13            | 8             | O                           | -0.30195   | 2.417266  | 0.179511  |
| 14            | 6             | C                           | 7.190813   | -3.365149 | -6.036682 |
| 15            | 8             | O                           | 2.682533   | -4.177301 | 1.343109  |
| 16            | 1             | H                           | 7.491699   | -1.277162 | 1.471956  |
| 17            | 6             | C                           | 9.763258   | 2.502703  | 4.007343  |
| 18            | 8             | O                           | 9.799428   | 4.38522   | -0.162977 |
| 19            | 1             | H                           | 8.494364   | 1.33844   | -3.527091 |
| 20            | 6             | C                           | -3.097757  | -2.839071 | 0.018302  |
| 21            | 6             | C                           | -3.715831  | 0.420882  | -3.510913 |
| 22            | 6             | C                           | -4.640493  | -1.367699 | 1.874701  |
| 23            | 6             | C                           | -3.977937  | -0.414063 | 4.165433  |
| 24            | 6             | C                           | -6.189602  | 0.793451  | 5.511555  |
| 25            | 6             | C                           | -8.221363  | 1.075157  | 3.44826   |
| 26            | 6             | C                           | -7.321861  | -0.858336 | 1.451989  |
| 27            | 6             | C                           | -1.443346  | -0.500314 | 5.380634  |
| 28            | 8             | O                           | -8.762103  | -1.817491 | -0.069099 |
| 29            | 6             | C                           | -8.006801  | 3.774188  | 2.279362  |
| 30            | 8             | O                           | -10.695318 | 0.512907  | 4.211638  |
| 31            | 6             | C                           | -10.426008 | 5.009825  | 1.335051  |
| 32            | 8             | O                           | -5.962125  | 4.789507  | 2.143609  |
| 33            | 6             | C                           | -10.092039 | 7.867096  | 1.110872  |
| 34            | 6             | C                           | -11.196754 | 3.807794  | -1.204031 |
| 35            | 1             | H                           | 4.063072   | 1.663993  | 2.265167  |

|    |   |   |            |           |           |
|----|---|---|------------|-----------|-----------|
| 36 | 1 | H | 4.693464   | 3.37595   | -0.542761 |
| 37 | 1 | H | 2.534883   | -1.363287 | -5.187118 |
| 38 | 1 | H | 4.321012   | 1.473256  | -4.775599 |
| 39 | 1 | H | 10.867881  | -3.32712  | -1.11267  |
| 40 | 1 | H | 12.177747  | -1.43521  | -3.556771 |
| 41 | 1 | H | 13.404134  | 1.783964  | -0.592129 |
| 42 | 1 | H | 12.915274  | -0.566023 | 1.746092  |
| 43 | 1 | H | -0.902782  | -2.55507  | -3.3673   |
| 44 | 1 | H | 5.655156   | -4.498244 | -6.860871 |
| 45 | 1 | H | 7.814274   | -1.962227 | -7.439789 |
| 46 | 1 | H | 8.788138   | -4.624862 | -5.616861 |
| 47 | 1 | H | 11.477628  | 3.551873  | 4.542244  |
| 48 | 1 | H | 8.108749   | 3.62743   | 4.595718  |
| 49 | 1 | H | 9.717421   | 0.714256  | 5.068092  |
| 50 | 1 | H | 8.472207   | 5.452715  | 0.496872  |
| 51 | 1 | H | -4.379417  | -4.15466  | -0.961812 |
| 52 | 1 | H | -1.656248  | -3.969081 | 0.988795  |
| 53 | 1 | H | -4.450803  | 1.915775  | -2.269749 |
| 54 | 1 | H | -5.308125  | -0.733536 | -4.179887 |
| 55 | 1 | H | -2.825519  | 1.344904  | -5.149617 |
| 56 | 1 | H | -6.922753  | -0.477379 | 6.991546  |
| 57 | 1 | H | -5.654585  | 2.592163  | 6.403296  |
| 58 | 1 | H | -0.656272  | 1.431151  | 5.396204  |
| 59 | 1 | H | -1.595287  | -1.116048 | 7.365636  |
| 60 | 1 | H | -0.109926  | -1.736592 | 4.380603  |
| 61 | 1 | H | -11.386752 | -0.586644 | 2.910225  |
| 62 | 1 | H | -11.904756 | 4.554362  | 2.726349  |
| 63 | 1 | H | -8.566945  | 8.323712  | -0.226302 |
| 64 | 1 | H | -11.851557 | 8.751049  | 0.438672  |
| 65 | 1 | H | -9.588816  | 8.719787  | 2.939765  |
| 66 | 1 | H | -12.983294 | 4.642784  | -1.867699 |
| 67 | 1 | H | -11.442962 | 1.752009  | -1.06184  |
| 68 | 1 | H | -9.741501  | 4.169822  | -2.649167 |

| 2-2_en_       |               | Standard Orientation (A.U.) |            |           |           |
|---------------|---------------|-----------------------------|------------|-----------|-----------|
| Center number | Atomic number | Atomic Type                 | X          | Y         | Z         |
| 0             | 6             | C                           | 5.351697   | -1.175817 | 1.063781  |
| 1             | 6             | C                           | 3.565299   | 1.11551   | 0.554766  |
| 2             | 6             | C                           | 2.199519   | 0.582795  | -1.962106 |
| 3             | 8             | O                           | 3.607113   | 1.539978  | -3.871041 |
| 4             | 6             | C                           | 5.95246    | 2.646115  | -2.891943 |
| 5             | 6             | C                           | 7.939114   | 0.552172  | -2.622969 |
| 6             | 6             | C                           | 6.826661   | -1.791531 | -1.332337 |
| 7             | 6             | C                           | 5.160084   | 3.427212  | -0.210623 |
| 8             | 6             | C                           | 9.236034   | -0.61033  | -4.932879 |
| 9             | 6             | C                           | 10.31925   | -3.140915 | -3.899826 |
| 10            | 6             | C                           | 9.120139   | -3.586356 | -1.251945 |
| 11            | 6             | C                           | 1.947505   | 1.634102  | 2.907494  |
| 12            | 6             | C                           | -0.861018  | 2.091799  | 2.601546  |
| 13            | 8             | O                           | 2.992202   | 1.687645  | 4.947376  |
| 14            | 6             | C                           | 6.713528   | 4.790422  | -4.62358  |
| 15            | 8             | O                           | 0.276058   | -0.567682 | -2.32447  |
| 16            | 1             | H                           | 5.495906   | -2.656511 | -2.686661 |
| 17            | 6             | C                           | 8.440233   | -6.336156 | -0.728046 |
| 18            | 8             | O                           | 10.934178  | -2.720867 | 0.55372   |
| 19            | 1             | H                           | 9.421329   | 1.301094  | -1.366079 |
| 20            | 6             | C                           | -2.243692  | 2.037564  | 5.161577  |
| 21            | 6             | C                           | -1.365791  | 4.554928  | 1.136215  |
| 22            | 6             | C                           | -5.028489  | 1.882684  | 4.723128  |
| 23            | 6             | C                           | -6.899584  | 3.603871  | 5.068471  |
| 24            | 6             | C                           | -9.449549  | 2.5927    | 4.246969  |
| 25            | 6             | C                           | -8.750796  | 0.354084  | 2.517232  |
| 26            | 6             | C                           | -6.146918  | -0.385795 | 3.590719  |
| 27            | 6             | C                           | -6.660408  | 6.212158  | 6.092692  |
| 28            | 8             | O                           | -5.337791  | -2.537589 | 3.515092  |
| 29            | 6             | C                           | -8.319242  | 1.40762   | -0.213118 |
| 30            | 8             | O                           | -10.397319 | -1.706371 | 2.534373  |
| 31            | 6             | C                           | -8.764458  | -0.373395 | -2.417669 |
| 32            | 8             | O                           | -7.61888   | 3.571054  | -0.493268 |
| 33            | 6             | C                           | -9.076691  | 1.101382  | -4.878673 |
| 34            | 6             | C                           | -6.562119  | -2.280569 | -2.576964 |
| 35            | 1             | H                           | 4.217691   | -2.803807 | 1.691784  |
| 36            | 1             | H                           | 6.599457   | -0.626036 | 2.632507  |
| 37            | 1             | H                           | 3.995719   | 5.149008  | -0.266461 |
| 38            | 1             | H                           | 6.766365   | 3.748564  | 1.060113  |
| 39            | 1             | H                           | 7.823753   | -0.964923 | -6.420631 |

|    |   |   |            |           |           |
|----|---|---|------------|-----------|-----------|
| 40 | 1 | H | 10.70923   | 0.611472  | -5.740809 |
| 41 | 1 | H | 12.38021   | -3.0683   | -3.660403 |
| 42 | 1 | H | 9.890291   | -4.725774 | -5.172784 |
| 43 | 1 | H | -1.551641  | 0.514135  | 1.430053  |
| 44 | 1 | H | 8.462537   | 5.670141  | -3.921299 |
| 45 | 1 | H | 7.05862    | 4.093575  | -6.550174 |
| 46 | 1 | H | 5.222478   | 6.236727  | -4.702408 |
| 47 | 1 | H | 10.141948  | -7.528651 | -0.818386 |
| 48 | 1 | H | 7.607208   | -6.54638  | 1.171804  |
| 49 | 1 | H | 7.053679   | -7.047695 | -2.105611 |
| 50 | 1 | H | 10.265467  | -3.037171 | 2.223819  |
| 51 | 1 | H | -1.620824  | 0.359309  | 6.221186  |
| 52 | 1 | H | -1.722682  | 3.695719  | 6.300307  |
| 53 | 1 | H | -3.408059  | 4.805154  | 0.852509  |
| 54 | 1 | H | -0.496337  | 4.542261  | -0.749967 |
| 55 | 1 | H | -0.632891  | 6.199579  | 2.184006  |
| 56 | 1 | H | -10.527518 | 1.858896  | 5.87149   |
| 57 | 1 | H | -10.592966 | 4.04745   | 3.302745  |
| 58 | 1 | H | -7.218241  | 7.579127  | 4.61871   |
| 59 | 1 | H | -7.958037  | 6.504524  | 7.698057  |
| 60 | 1 | H | -4.728172  | 6.656348  | 6.705051  |
| 61 | 1 | H | -9.347468  | -3.185721 | 2.847009  |
| 62 | 1 | H | -10.499591 | -1.436303 | -1.979609 |
| 63 | 1 | H | -7.354842  | 2.184553  | -5.307479 |
| 64 | 1 | H | -9.442978  | -0.204534 | -6.455724 |
| 65 | 1 | H | -10.654454 | 2.451784  | -4.766083 |
| 66 | 1 | H | -6.873042  | -3.557603 | -4.189705 |
| 67 | 1 | H | -6.394335  | -3.433825 | -0.860346 |
| 68 | 1 | H | -4.74397   | -1.309835 | -2.868755 |

| 2-3_en_       |               | Standard Orientation (A.U.) |            |           |           |
|---------------|---------------|-----------------------------|------------|-----------|-----------|
| Center number | Atomic number | Atomic Type                 | X          | Y         | Z         |
| 0             | 6             | C                           | 5.346245   | -1.321152 | 0.995389  |
| 1             | 6             | C                           | 3.555596   | 0.987929  | 0.597135  |
| 2             | 6             | C                           | 2.132768   | 0.533439  | -1.90335  |
| 3             | 8             | O                           | 3.496224   | 1.550493  | -3.813448 |
| 4             | 6             | C                           | 5.865972   | 2.621762  | -2.85427  |
| 5             | 6             | C                           | 7.853399   | 0.517379  | -2.694926 |
| 6             | 6             | C                           | 6.765837   | -1.863689 | -1.451537 |
| 7             | 6             | C                           | 5.138578   | 3.319097  | -0.131745 |
| 8             | 6             | C                           | 9.09696    | -0.575284 | -5.066736 |
| 9             | 6             | C                           | 10.207601  | -3.131014 | -4.130717 |
| 10            | 6             | C                           | 9.056781   | -3.663263 | -1.476747 |
| 11            | 6             | C                           | 1.989809   | 1.439246  | 2.998549  |
| 12            | 6             | C                           | -0.822581  | 1.91547   | 2.765272  |
| 13            | 8             | O                           | 3.077164   | 1.425146  | 5.016754  |
| 14            | 6             | C                           | 6.590948   | 4.819281  | -4.534263 |
| 15            | 8             | O                           | 0.201915   | -0.607512 | -2.256437 |
| 16            | 1             | H                           | 5.404044   | -2.685932 | -2.801721 |
| 17            | 6             | C                           | 8.381296   | -6.428846 | -1.035604 |
| 18            | 8             | O                           | 10.905885  | -2.862898 | 0.322864  |
| 19            | 1             | H                           | 9.36514    | 1.22562   | -1.449426 |
| 20            | 6             | C                           | -2.151627  | 1.791758  | 5.35131   |
| 21            | 6             | C                           | -1.35047   | 4.419029  | 1.378718  |
| 22            | 6             | C                           | -4.944393  | 1.642533  | 4.965154  |
| 23            | 6             | C                           | -6.808484  | 3.354749  | 5.384901  |
| 24            | 6             | C                           | -9.373386  | 2.362924  | 4.587405  |
| 25            | 6             | C                           | -8.707341  | 0.164951  | 2.79388   |
| 26            | 6             | C                           | -6.084239  | -0.599804 | 3.801708  |
| 27            | 6             | C                           | -6.549457  | 5.939295  | 6.463437  |
| 28            | 8             | O                           | -5.276983  | -2.749054 | 3.660846  |
| 29            | 6             | C                           | -8.326665  | 1.282407  | 0.081034  |
| 30            | 8             | O                           | -10.354202 | -1.895154 | 2.792613  |
| 31            | 6             | C                           | -8.819791  | -0.444947 | -2.155645 |
| 32            | 8             | O                           | -7.62842   | 3.45093   | -0.161512 |
| 33            | 6             | C                           | -9.162885  | 1.086865  | -4.577214 |
| 34            | 6             | C                           | -6.635181  | -2.364156 | -2.395717 |
| 35            | 1             | H                           | 4.222034   | -2.965783 | 1.59687   |
| 36            | 1             | H                           | 6.630461   | -0.823463 | 2.551893  |
| 37            | 1             | H                           | 3.980174   | 5.045473  | -0.103254 |
| 38            | 1             | H                           | 6.77614    | 3.593477  | 1.10961   |
| 39            | 1             | H                           | 7.65081    | -0.890949 | -6.53066  |

|    |   |   |            |           |           |
|----|---|---|------------|-----------|-----------|
| 40 | 1 | H | 10.54918   | 0.671613  | -5.874331 |
| 41 | 1 | H | 12.271796  | -3.054238 | -3.92253  |
| 42 | 1 | H | 9.766095   | -4.678369 | -5.44484  |
| 43 | 1 | H | -1.542343  | 0.372768  | 1.564914  |
| 44 | 1 | H | 8.357863   | 5.673527  | -3.8456   |
| 45 | 1 | H | 6.888271   | 4.185223  | -6.490298 |
| 46 | 1 | H | 5.100934   | 6.268764  | -4.529988 |
| 47 | 1 | H | 10.077613  | -7.620003 | -1.208113 |
| 48 | 1 | H | 7.591898   | -6.706945 | 0.874175  |
| 49 | 1 | H | 6.962275   | -7.08813  | -2.406019 |
| 50 | 1 | H | 10.269455  | -3.238089 | 1.993351  |
| 51 | 1 | H | -1.502438  | 0.088842  | 6.353808  |
| 52 | 1 | H | -1.61142   | 3.422303  | 6.520577  |
| 53 | 1 | H | -0.522126  | 4.454796  | -0.525381 |
| 54 | 1 | H | -0.590365  | 6.032835  | 2.454529  |
| 55 | 1 | H | -3.397644  | 4.680698  | 1.145505  |
| 56 | 1 | H | -10.422677 | 1.592649  | 6.213859  |
| 57 | 1 | H | -10.532487 | 3.839515  | 3.69788   |
| 58 | 1 | H | -7.821742  | 6.197585  | 8.09461   |
| 59 | 1 | H | -4.60729   | 6.367181  | 7.055624  |
| 60 | 1 | H | -7.12723   | 7.339363  | 5.028754  |
| 61 | 1 | H | -9.299455  | -3.381602 | 3.049826  |
| 62 | 1 | H | -10.555054 | -1.505552 | -1.711452 |
| 63 | 1 | H | -7.440967  | 2.168476  | -5.009598 |
| 64 | 1 | H | -9.562896  | -0.181153 | -6.176809 |
| 65 | 1 | H | -10.729611 | 2.444229  | -4.408903 |
| 66 | 1 | H | -6.987468  | -3.605566 | -4.027535 |
| 67 | 1 | H | -6.443409  | -3.552611 | -0.706072 |
| 68 | 1 | H | -4.816163  | -1.399942 | -2.703497 |

| 2-4_en_       |               | Standard Orientation (A.U.) |            |           |           |
|---------------|---------------|-----------------------------|------------|-----------|-----------|
| Center number | Atomic number | Atomic Type                 | X          | Y         | Z         |
| 0             | 6             | C                           | 4.455616   | -0.923486 | 0.780233  |
| 1             | 6             | C                           | 2.815566   | -0.819311 | -1.66909  |
| 2             | 6             | C                           | 3.297179   | -3.296101 | -3.144879 |
| 3             | 8             | O                           | 5.288656   | -2.929719 | -4.708825 |
| 4             | 6             | C                           | 6.28646    | -0.363631 | -4.42414  |
| 5             | 6             | C                           | 8.193206   | -0.342916 | -2.233448 |
| 6             | 6             | C                           | 7.133819   | -1.721077 | 0.085034  |
| 7             | 6             | C                           | 3.941089   | 1.090801  | -3.52665  |
| 8             | 6             | C                           | 10.816138  | -1.542466 | -2.470473 |
| 9             | 6             | C                           | 11.668318  | -1.887713 | 0.325205  |
| 10            | 6             | C                           | 9.286245   | -1.470504 | 2.02896   |
| 11            | 6             | C                           | 0.002805   | -0.399232 | -1.146199 |
| 12            | 6             | C                           | -1.365468  | -2.22904  | 0.605661  |
| 13            | 8             | O                           | -1.077039  | 1.375949  | -2.111223 |
| 14            | 6             | C                           | 7.36145    | 0.453452  | -6.94431  |
| 15            | 8             | O                           | 2.201811   | -5.2731   | -2.979356 |
| 16            | 1             | H                           | 7.078771   | -3.743542 | -0.421323 |
| 17            | 6             | C                           | 9.081304   | -3.318781 | 4.219159  |
| 18            | 8             | O                           | 9.287607   | 0.981601  | 3.15569   |
| 19            | 1             | H                           | 8.438402   | 1.676701  | -1.750626 |
| 20            | 6             | C                           | -1.642178  | -1.039133 | 3.282673  |
| 21            | 6             | C                           | -3.91499   | -2.969374 | -0.548222 |
| 22            | 6             | C                           | -3.453457  | 1.127315  | 3.432142  |
| 23            | 6             | C                           | -3.038508  | 3.653133  | 3.223762  |
| 24            | 6             | C                           | -5.414412  | 5.184023  | 3.658168  |
| 25            | 6             | C                           | -7.547367  | 3.231783  | 3.522646  |
| 26            | 6             | C                           | -6.136519  | 0.7236    | 3.977753  |
| 27            | 6             | C                           | -0.603895  | 4.945618  | 2.663754  |
| 28            | 8             | O                           | -7.20552   | -1.162458 | 4.751948  |
| 29            | 6             | C                           | -8.625269  | 3.075937  | 0.79013   |
| 30            | 8             | O                           | -9.495987  | 3.529011  | 5.299227  |
| 31            | 6             | C                           | -11.107819 | 1.65249   | 0.474128  |
| 32            | 8             | O                           | -7.512229  | 4.026524  | -0.964322 |
| 33            | 6             | C                           | -13.300478 | 3.556953  | 0.661413  |
| 34            | 6             | C                           | -11.131768 | 0.213508  | -2.033328 |
| 35            | 1             | H                           | 3.64416    | -2.260463 | 2.146524  |
| 36            | 1             | H                           | 4.472786   | 0.959586  | 1.666659  |
| 37            | 1             | H                           | 2.617326   | 1.434637  | -5.088965 |
| 38            | 1             | H                           | 4.399664   | 2.916244  | -2.65293  |
| 39            | 1             | H                           | 10.64134   | -3.387049 | -3.417854 |

|    |   |   |            |           |           |
|----|---|---|------------|-----------|-----------|
| 40 | 1 | H | 12.147342  | -0.395007 | -3.578706 |
| 41 | 1 | H | 13.126189  | -0.512477 | 0.880833  |
| 42 | 1 | H | 12.480018  | -3.774912 | 0.637313  |
| 43 | 1 | H | -0.194881  | -3.932501 | 0.804982  |
| 44 | 1 | H | 8.911668   | -0.799664 | -7.531108 |
| 45 | 1 | H | 5.888479   | 0.411857  | -8.409756 |
| 46 | 1 | H | 8.101559   | 2.392595  | -6.801473 |
| 47 | 1 | H | 10.728794  | -3.131566 | 5.473756  |
| 48 | 1 | H | 7.377621   | -2.914281 | 5.341354  |
| 49 | 1 | H | 8.97706    | -5.27749  | 3.531269  |
| 50 | 1 | H | 9.671872   | 2.219304  | 1.872221  |
| 51 | 1 | H | -2.349249  | -2.535164 | 4.545885  |
| 52 | 1 | H | 0.223724   | -0.471032 | 4.001013  |
| 53 | 1 | H | -5.002766  | -1.271071 | -1.047019 |
| 54 | 1 | H | -5.024745  | -4.107743 | 0.788992  |
| 55 | 1 | H | -3.61802   | -4.077203 | -2.281712 |
| 56 | 1 | H | -5.397475  | 6.028304  | 5.562918  |
| 57 | 1 | H | -5.611533  | 6.705515  | 2.258419  |
| 58 | 1 | H | 1.026867   | 3.667464  | 2.784076  |
| 59 | 1 | H | -0.677805  | 5.699373  | 0.721716  |
| 60 | 1 | H | -0.301462  | 6.555759  | 3.95009   |
| 61 | 1 | H | -9.799197  | 1.857021  | 6.001906  |
| 62 | 1 | H | -11.271035 | 0.306411  | 2.053278  |
| 63 | 1 | H | -13.165463 | 4.964294  | -0.866773 |
| 64 | 1 | H | -15.123868 | 2.571165  | 0.47357   |
| 65 | 1 | H | -13.266024 | 4.548476  | 2.485137  |
| 66 | 1 | H | -12.949439 | -0.764999 | -2.29126  |
| 67 | 1 | H | -9.613024  | -1.206372 | -2.099485 |
| 68 | 1 | H | -10.845388 | 1.522145  | -3.622544 |



| 2-5_en_       |               | Standard Orientation (A.U.) |           |           |           |
|---------------|---------------|-----------------------------|-----------|-----------|-----------|
| Center number | Atomic number | Atomic Type                 | X         | Y         | Z         |
| 0             | 6             | C                           | 3.420284  | -0.182939 | 1.145045  |
| 1             | 6             | C                           | 3.682765  | 2.173189  | -0.623562 |
| 2             | 6             | C                           | 2.800467  | 1.368717  | -3.290387 |
| 3             | 8             | O                           | 4.814985  | 0.467452  | -4.569499 |
| 4             | 6             | C                           | 7.078966  | 0.503092  | -2.961593 |
| 5             | 6             | C                           | 7.141622  | -1.93343  | -1.386109 |
| 6             | 6             | C                           | 4.554184  | -2.463083 | -0.19546  |
| 7             | 6             | C                           | 6.475714  | 2.693442  | -1.154297 |
| 8             | 6             | C                           | 7.767415  | -4.494651 | -2.579849 |
| 9             | 6             | C                           | 6.699823  | -6.434773 | -0.641345 |
| 10            | 6             | C                           | 5.010189  | -4.922946 | 1.258711  |
| 11            | 6             | C                           | 2.216399  | 4.434002  | 0.400277  |
| 12            | 6             | C                           | -0.614686 | 4.092397  | 0.774376  |
| 13            | 8             | O                           | 3.285338  | 6.386106  | 0.939403  |
| 14            | 6             | C                           | 9.350801  | 0.885852  | -4.65459  |
| 15            | 8             | O                           | 0.708428  | 1.431474  | -4.172508 |
| 16            | 1             | H                           | 3.268341  | -2.987921 | -1.752165 |
| 17            | 6             | C                           | 2.588274  | -6.290019 | 2.014588  |
| 18            | 8             | O                           | 6.421817  | -4.242363 | 3.458179  |
| 19            | 1             | H                           | 8.486494  | -1.593968 | 0.167148  |
| 20            | 6             | C                           | -1.202195 | 3.87532   | 3.642118  |
| 21            | 6             | C                           | -2.090636 | 6.235729  | -0.483391 |
| 22            | 6             | C                           | -3.762572 | 2.736415  | 3.974939  |
| 23            | 6             | C                           | -6.012598 | 3.792456  | 4.626566  |
| 24            | 6             | C                           | -8.149865 | 1.888328  | 4.550984  |
| 25            | 6             | C                           | -7.059069 | -0.251005 | 2.926278  |
| 26            | 6             | C                           | -4.207695 | 0.08201   | 3.323924  |
| 27            | 6             | C                           | -6.507485 | 6.474653  | 5.308561  |
| 28            | 8             | O                           | -2.716419 | -1.662225 | 3.080701  |
| 29            | 6             | C                           | -7.467765 | 0.379703  | 0.067584  |
| 30            | 8             | O                           | -7.846054 | -2.705878 | 3.500038  |
| 31            | 6             | C                           | -7.03944  | -1.765658 | -1.794517 |
| 32            | 8             | O                           | -8.045947 | 2.494549  | -0.579474 |
| 33            | 6             | C                           | -9.594651 | -3.066298 | -2.297863 |
| 34            | 6             | C                           | -5.815487 | -0.774296 | -4.221569 |
| 35            | 1             | H                           | 1.433932  | -0.545405 | 1.622975  |
| 36            | 1             | H                           | 4.451861  | 0.204034  | 2.908294  |
| 37            | 1             | H                           | 6.702925  | 4.531176  | -2.097462 |
| 38            | 1             | H                           | 7.651329  | 2.686866  | 0.554244  |
| 39            | 1             | H                           | 6.780323  | -4.670074 | -4.404174 |

|    |   |   |            |           |           |
|----|---|---|------------|-----------|-----------|
| 40 | 1 | H | 9.797045   | -4.758361 | -2.937299 |
| 41 | 1 | H | 8.223036   | -7.374495 | 0.417952  |
| 42 | 1 | H | 5.604454   | -7.925775 | -1.589775 |
| 43 | 1 | H | -1.159574  | 2.308839  | -0.131561 |
| 44 | 1 | H | 11.081905  | 0.945631  | -3.502697 |
| 45 | 1 | H | 9.52566    | -0.668868 | -6.022197 |
| 46 | 1 | H | 9.186591   | 2.673132  | -5.702953 |
| 47 | 1 | H | 3.026772   | -8.06841  | 3.012272  |
| 48 | 1 | H | 1.432308   | -5.098549 | 3.265638  |
| 49 | 1 | H | 1.446223   | -6.767971 | 0.343114  |
| 50 | 1 | H | 6.739939   | -5.761335 | 4.418474  |
| 51 | 1 | H | 0.198134   | 2.636875  | 4.558144  |
| 52 | 1 | H | -1.042822  | 5.745962  | 4.531788  |
| 53 | 1 | H | -1.507181  | 8.074905  | 0.292785  |
| 54 | 1 | H | -4.132849  | 5.976064  | -0.19294  |
| 55 | 1 | H | -1.742731  | 6.241999  | -2.532389 |
| 56 | 1 | H | -8.562655  | 1.144644  | 6.452274  |
| 57 | 1 | H | -9.887324  | 2.712392  | 3.767492  |
| 58 | 1 | H | -7.500761  | 6.604438  | 7.13667   |
| 59 | 1 | H | -4.774874  | 7.612277  | 5.400379  |
| 60 | 1 | H | -7.774258  | 7.317569  | 3.881577  |
| 61 | 1 | H | -6.316099  | -3.722339 | 3.592713  |
| 62 | 1 | H | -5.776723  | -3.147335 | -0.883837 |
| 63 | 1 | H | -9.336024  | -4.659672 | -3.610985 |
| 64 | 1 | H | -10.424577 | -3.787016 | -0.535596 |
| 65 | 1 | H | -10.928376 | -1.723744 | -3.165039 |
| 66 | 1 | H | -3.928036  | 0.027553  | -3.875486 |
| 67 | 1 | H | -6.997901  | 0.710855  | -5.068381 |
| 68 | 1 | H | -5.609076  | -2.31947  | -5.599437 |

| 2-6_en_       |               | Standard Orientation (A.U.) |            |           |           |
|---------------|---------------|-----------------------------|------------|-----------|-----------|
| Center number | Atomic number | Atomic Type                 | X          | Y         | Z         |
| 0             | 6             | C                           | 5.299215   | -1.348471 | 1.261728  |
| 1             | 6             | C                           | 3.619731   | 1.00267   | 0.662517  |
| 2             | 6             | C                           | 2.242748   | 0.434911  | -1.838748 |
| 3             | 8             | O                           | 3.69467    | 1.263405  | -3.773412 |
| 4             | 6             | C                           | 6.083327   | 2.301091  | -2.822291 |
| 5             | 6             | C                           | 7.973057   | 0.130197  | -2.466832 |
| 6             | 6             | C                           | 6.749702   | -2.115066 | -1.104925 |
| 7             | 6             | C                           | 5.313955   | 3.213547  | -0.177154 |
| 8             | 6             | C                           | 9.229467   | -1.168075 | -4.726571 |
| 9             | 6             | C                           | 10.188499  | -3.710004 | -3.602085 |
| 10            | 6             | C                           | 8.955395   | -4.010958 | -0.949639 |
| 11            | 6             | C                           | 2.034846   | 1.669222  | 2.998172  |
| 12            | 6             | C                           | -0.783644  | 2.078538  | 2.722204  |
| 13            | 8             | O                           | 3.119874   | 1.870775  | 5.007613  |
| 14            | 6             | C                           | 6.9475     | 4.34254   | -4.627578 |
| 15            | 8             | O                           | 0.278963   | -0.656355 | -2.168517 |
| 16            | 1             | H                           | 5.384229   | -2.963512 | -2.434839 |
| 17            | 6             | C                           | 8.140491   | -6.705845 | -0.339045 |
| 18            | 8             | O                           | 10.796949  | -3.172181 | 0.840443  |
| 19            | 1             | H                           | 9.480932   | 0.855311  | -1.226719 |
| 20            | 6             | C                           | -2.109636  | 2.115048  | 5.312805  |
| 21            | 6             | C                           | -1.329298  | 4.481738  | 1.173889  |
| 22            | 6             | C                           | -4.905108  | 1.976019  | 4.948434  |
| 23            | 6             | C                           | -6.732673  | 3.759285  | 5.210379  |
| 24            | 6             | C                           | -9.320182  | 2.767362  | 4.487036  |
| 25            | 6             | C                           | -8.713169  | 0.37835   | 2.960554  |
| 26            | 6             | C                           | -6.083644  | -0.337325 | 3.975715  |
| 27            | 6             | C                           | -6.411883  | 6.424551  | 6.050183  |
| 28            | 8             | O                           | -5.28403   | -2.492883 | 3.910566  |
| 29            | 6             | C                           | -8.226937  | 1.091166  | 0.143096  |
| 30            | 8             | O                           | -10.404192 | -1.638826 | 3.192786  |
| 31            | 6             | C                           | -8.295318  | -1.057829 | -1.76034  |
| 32            | 8             | O                           | -7.758099  | 3.255627  | -0.438047 |
| 33            | 6             | C                           | -11.013207 | -1.302351 | -2.775288 |
| 34            | 6             | C                           | -6.373134  | -0.616679 | -3.875101 |
| 35            | 1             | H                           | 4.091374   | -2.900266 | 1.943215  |
| 36            | 1             | H                           | 6.5679     | -0.796602 | 2.812965  |
| 37            | 1             | H                           | 4.22005    | 4.978387  | -0.303145 |
| 38            | 1             | H                           | 6.925109   | 3.516978  | 1.091423  |
| 39            | 1             | H                           | 7.813282   | -1.506638 | -6.21431  |

|    |   |   |            |           |           |
|----|---|---|------------|-----------|-----------|
| 40 | 1 | H | 10.763156  | -0.042053 | -5.560422 |
| 41 | 1 | H | 12.2493    | -3.724682 | -3.351684 |
| 42 | 1 | H | 9.693898   | -5.314632 | -4.825381 |
| 43 | 1 | H | -1.482926  | 0.453843  | 1.622942  |
| 44 | 1 | H | 8.729042   | 5.171364  | -3.945545 |
| 45 | 1 | H | 7.273352   | 3.557437  | -6.523149 |
| 46 | 1 | H | 5.522386   | 5.848921  | -4.773655 |
| 47 | 1 | H | 9.784956   | -7.978987 | -0.361085 |
| 48 | 1 | H | 7.272962   | -6.806891 | 1.554259  |
| 49 | 1 | H | 6.739711   | -7.401302 | -1.710345 |
| 50 | 1 | H | 10.105049  | -3.403892 | 2.514926  |
| 51 | 1 | H | -1.478463  | 0.462969  | 6.407876  |
| 52 | 1 | H | -1.54275   | 3.800941  | 6.386585  |
| 53 | 1 | H | -0.624318  | 6.172128  | 2.166282  |
| 54 | 1 | H | -3.375203  | 4.689574  | 0.878927  |
| 55 | 1 | H | -0.458082  | 4.419838  | -0.710394 |
| 56 | 1 | H | -10.416863 | 2.22687   | 6.173402  |
| 57 | 1 | H | -10.407163 | 4.174916  | 3.413585  |
| 58 | 1 | H | -4.467079  | 6.851378  | 6.634135  |
| 59 | 1 | H | -6.927628  | 7.703729  | 4.484932  |
| 60 | 1 | H | -7.700545  | 6.866889  | 7.62801   |
| 61 | 1 | H | -9.370239  | -3.125449 | 3.520647  |
| 62 | 1 | H | -7.825621  | -2.808942 | -0.73741  |
| 63 | 1 | H | -11.575142 | 0.442583  | -3.762263 |
| 64 | 1 | H | -11.125133 | -2.875229 | -4.132948 |
| 65 | 1 | H | -12.356563 | -1.661454 | -1.233192 |
| 66 | 1 | H | -4.421626  | -0.574065 | -3.158784 |
| 67 | 1 | H | -6.748007  | 1.193095  | -4.827651 |
| 68 | 1 | H | -6.502913  | -2.141696 | -5.284637 |

| 2-7_en_       |               | Standard Orientation (A.U.) |            |           |           |
|---------------|---------------|-----------------------------|------------|-----------|-----------|
| Center number | Atomic number | Atomic Type                 | X          | Y         | Z         |
| 0             | 6             | C                           | 5.231713   | -1.233141 | 1.090411  |
| 1             | 6             | C                           | 3.674858   | 1.137866  | 0.268239  |
| 2             | 6             | C                           | 2.166889   | 0.376344  | -2.10392  |
| 3             | 8             | O                           | 3.592721   | 0.880739  | -4.168863 |
| 4             | 6             | C                           | 6.073258   | 1.865286  | -3.422387 |
| 5             | 6             | C                           | 7.841997   | -0.367178 | -2.877195 |
| 6             | 6             | C                           | 6.53082    | -2.355608 | -1.22026  |
| 7             | 6             | C                           | 5.467685   | 3.120206  | -0.878104 |
| 8             | 6             | C                           | 8.915411   | -1.996606 | -5.015548 |
| 9             | 6             | C                           | 9.706636   | -4.483127 | -3.656285 |
| 10            | 6             | C                           | 8.600068   | -4.360626 | -0.918892 |
| 11            | 6             | C                           | 2.230522   | 2.170232  | 2.562628  |
| 12            | 6             | C                           | -0.594182  | 2.574946  | 2.377573  |
| 13            | 8             | O                           | 3.426293   | 2.659237  | 4.455577  |
| 14            | 6             | C                           | 6.980879   | 3.630038  | -5.481575 |
| 15            | 8             | O                           | 0.130421   | -0.617786 | -2.253553 |
| 16            | 1             | H                           | 5.069941   | -3.255664 | -2.406333 |
| 17            | 6             | C                           | 7.653288   | -6.898273 | 0.062774  |
| 18            | 8             | O                           | 10.407987  | -3.321849 | 0.795415  |
| 19            | 1             | H                           | 9.438145   | 0.397985  | -1.782403 |
| 20            | 6             | C                           | -1.816525  | 2.867855  | 5.002603  |
| 21            | 6             | C                           | -1.166062  | 4.846279  | 0.647817  |
| 22            | 6             | C                           | -4.621047  | 2.669852  | 4.750231  |
| 23            | 6             | C                           | -6.469891  | 4.441148  | 4.912445  |
| 24            | 6             | C                           | -9.060633  | 3.334577  | 4.398131  |
| 25            | 6             | C                           | -8.455933  | 0.841623  | 3.015375  |
| 26            | 6             | C                           | -5.795189  | 0.26159   | 4.045448  |
| 27            | 6             | C                           | -6.171741  | 7.17832   | 5.485479  |
| 28            | 8             | O                           | -4.986351  | -1.881811 | 4.254791  |
| 29            | 6             | C                           | -8.18279   | 1.441907  | 0.131568  |
| 30            | 8             | O                           | -10.093095 | -1.180063 | 3.456023  |
| 31            | 6             | C                           | -8.760479  | -0.662925 | -1.730656 |
| 32            | 8             | O                           | -7.501041  | 3.525947  | -0.531088 |
| 33            | 6             | C                           | -9.229883  | 0.4079    | -4.369303 |
| 34            | 6             | C                           | -6.566885  | -2.586549 | -1.720495 |
| 35            | 1             | H                           | 3.95825    | -2.618446 | 1.979669  |
| 36            | 1             | H                           | 6.610237   | -0.622925 | 2.515958  |
| 37            | 1             | H                           | 4.480601   | 4.927518  | -1.174878 |
| 38            | 1             | H                           | 7.142398   | 3.458873  | 0.295109  |
| 39            | 1             | H                           | 7.427144   | -2.376649 | -6.420243 |

|    |   |   |            |           |           |
|----|---|---|------------|-----------|-----------|
| 40 | 1 | H | 10.500639  | -1.093418 | -6.009268 |
| 41 | 1 | H | 11.774045  | -4.676096 | -3.539171 |
| 42 | 1 | H | 8.991762   | -6.153731 | -4.666235 |
| 43 | 1 | H | -1.363446  | 0.876186  | 1.455493  |
| 44 | 1 | H | 8.842598   | 4.405965  | -4.973128 |
| 45 | 1 | H | 7.162099   | 2.622149  | -7.289467 |
| 46 | 1 | H | 5.647451   | 5.204273  | -5.736735 |
| 47 | 1 | H | 9.203488   | -8.292274 | 0.116484  |
| 48 | 1 | H | 6.904905   | -6.69535  | 1.992451  |
| 49 | 1 | H | 6.152314   | -7.668444 | -1.15381  |
| 50 | 1 | H | 11.754169  | -4.535977 | 1.007778  |
| 51 | 1 | H | -1.131534  | 1.337582  | 6.234469  |
| 52 | 1 | H | -1.226745  | 4.657614  | 5.876687  |
| 53 | 1 | H | -0.414208  | 6.603452  | 1.476312  |
| 54 | 1 | H | -3.218165  | 5.047855  | 0.395985  |
| 55 | 1 | H | -0.346331  | 4.616746  | -1.247403 |
| 56 | 1 | H | -10.051889 | 2.882735  | 6.173805  |
| 57 | 1 | H | -10.251523 | 4.629186  | 3.292765  |
| 58 | 1 | H | -7.410114  | 7.752393  | 7.061222  |
| 59 | 1 | H | -4.214875  | 7.687659  | 5.951579  |
| 60 | 1 | H | -6.76557   | 8.290715  | 3.823282  |
| 61 | 1 | H | -9.018544  | -2.600417 | 3.92081   |
| 62 | 1 | H | -10.462091 | -1.628761 | -1.021251 |
| 63 | 1 | H | -9.694727  | -1.125794 | -5.695537 |
| 64 | 1 | H | -10.799187 | 1.772971  | -4.371013 |
| 65 | 1 | H | -7.54037   | 1.396021  | -5.070074 |
| 66 | 1 | H | -6.28267   | -3.442291 | 0.148114  |
| 67 | 1 | H | -4.776464  | -1.687594 | -2.285281 |
| 68 | 1 | H | -6.978985  | -4.109401 | -3.077175 |

| 2-8_en_       |               | Standard Orientation (A.U.) |            |           |           |
|---------------|---------------|-----------------------------|------------|-----------|-----------|
| Center number | Atomic number | Atomic Type                 | X          | Y         | Z         |
| 0             | 6             | C                           | 4.543602   | -0.938582 | 0.847767  |
| 1             | 6             | C                           | 2.939544   | -0.784977 | -1.622118 |
| 2             | 6             | C                           | 3.435481   | -3.239262 | -3.137583 |
| 3             | 8             | O                           | 5.439115   | -2.850568 | -4.669878 |
| 4             | 6             | C                           | 6.453941   | -0.292172 | -4.311804 |
| 5             | 6             | C                           | 8.324023   | -0.329923 | -2.096317 |
| 6             | 6             | C                           | 7.227326   | -1.751692 | 0.177051  |
| 7             | 6             | C                           | 4.100972   | 1.154528  | -3.425569 |
| 8             | 6             | C                           | 10.937657  | -1.544756 | -2.335534 |
| 9             | 6             | C                           | 11.75694   | -1.944946 | 0.458561  |
| 10            | 6             | C                           | 9.373151   | -1.539988 | 2.134508  |
| 11            | 6             | C                           | 0.116149   | -0.377632 | -1.145803 |
| 12            | 6             | C                           | -1.276909  | -2.217055 | 0.576101  |
| 13            | 8             | O                           | -0.957352  | 1.388801  | -2.134714 |
| 14            | 6             | C                           | 7.568135   | 0.570234  | -6.799123 |
| 15            | 8             | O                           | 2.327776   | -5.213935 | -3.012886 |
| 16            | 1             | H                           | 7.15086    | -3.769177 | -0.347759 |
| 17            | 6             | C                           | 9.146644   | -3.406079 | 4.316876  |
| 18            | 8             | O                           | 9.531191   | 0.984937  | 3.089863  |
| 19            | 1             | H                           | 8.592563   | 1.652897  | -1.515529 |
| 20            | 6             | C                           | -1.612005  | -1.042219 | 3.255275  |
| 21            | 6             | C                           | -3.796798  | -2.966856 | -0.63554  |
| 22            | 6             | C                           | -3.392934  | 1.151785  | 3.373446  |
| 23            | 6             | C                           | -2.933534  | 3.657596  | 3.113181  |
| 24            | 6             | C                           | -5.299338  | 5.230509  | 3.402489  |
| 25            | 6             | C                           | -7.473944  | 3.31438   | 3.446965  |
| 26            | 6             | C                           | -6.105845  | 0.745625  | 3.841471  |
| 27            | 6             | C                           | -0.467189  | 4.911079  | 2.593492  |
| 28            | 8             | O                           | -7.156894  | -1.214911 | 4.382836  |
| 29            | 6             | C                           | -8.77278   | 3.080226  | 0.830646  |
| 30            | 8             | O                           | -9.261772  | 3.625191  | 5.399877  |
| 31            | 6             | C                           | -11.199101 | 1.527103  | 0.754202  |
| 32            | 8             | O                           | -7.866013  | 4.053885  | -1.029439 |
| 33            | 6             | C                           | -13.472136 | 3.338716  | 0.691781  |
| 34            | 6             | C                           | -11.170147 | -0.229268 | -1.545162 |
| 35            | 1             | H                           | 3.689779   | -2.277342 | 2.187652  |
| 36            | 1             | H                           | 4.547928   | 0.949063  | 1.73027   |
| 37            | 1             | H                           | 2.801209   | 1.531328  | -5.000384 |
| 38            | 1             | H                           | 4.558266   | 2.960234  | -2.511524 |
| 39            | 1             | H                           | 10.770928  | -3.36881  | -3.325034 |

|    |   |   |            |           |           |
|----|---|---|------------|-----------|-----------|
| 40 | 1 | H | 12.286745  | -0.37504  | -3.397026 |
| 41 | 1 | H | 13.190078  | -0.566564 | 1.055228  |
| 42 | 1 | H | 12.550498  | -3.841935 | 0.754908  |
| 43 | 1 | H | -0.102817  | -3.916579 | 0.791082  |
| 44 | 1 | H | 9.119058   | -0.679544 | -7.390689 |
| 45 | 1 | H | 6.116236   | 0.57151   | -8.286363 |
| 46 | 1 | H | 8.320139   | 2.499659  | -6.60068  |
| 47 | 1 | H | 10.785759  | -3.240512 | 5.586631  |
| 48 | 1 | H | 7.425438   | -3.032511 | 5.434765  |
| 49 | 1 | H | 9.033189   | -5.365021 | 3.627885  |
| 50 | 1 | H | 8.20441    | 1.209281  | 4.323797  |
| 51 | 1 | H | -2.376082  | -2.538735 | 4.4834    |
| 52 | 1 | H | 0.243362   | -0.506987 | 4.026386  |
| 53 | 1 | H | -4.890103  | -1.273406 | -1.137299 |
| 54 | 1 | H | -4.92388   | -4.124112 | 0.669013  |
| 55 | 1 | H | -3.45299   | -4.052279 | -2.374535 |
| 56 | 1 | H | -5.254746  | 6.272     | 5.208102  |
| 57 | 1 | H | -5.475868  | 6.599777  | 1.847167  |
| 58 | 1 | H | -0.464739  | 5.636063  | 0.639836  |
| 59 | 1 | H | -0.178455  | 6.53661   | 3.864794  |
| 60 | 1 | H | 1.142135   | 3.614151  | 2.783753  |
| 61 | 1 | H | -10.115976 | 5.217803  | 5.142545  |
| 62 | 1 | H | -11.283202 | 0.406888  | 2.501056  |
| 63 | 1 | H | -13.377173 | 4.581334  | -0.97558  |
| 64 | 1 | H | -15.249459 | 2.260683  | 0.601856  |
| 65 | 1 | H | -13.549546 | 4.531918  | 2.394978  |
| 66 | 1 | H | -12.946041 | -1.307591 | -1.655858 |
| 67 | 1 | H | -9.598281  | -1.58539  | -1.425033 |
| 68 | 1 | H | -10.942289 | 0.86556   | -3.297907 |



| 2-9_en_       |               | Standard Orientation (A.U.) |            |           |           |
|---------------|---------------|-----------------------------|------------|-----------|-----------|
| Center number | Atomic number | Atomic Type                 | X          | Y         | Z         |
| 0             | 6             | C                           | 4.4885     | -0.926494 | 0.788876  |
| 1             | 6             | C                           | 2.872039   | -0.759055 | -1.672203 |
| 2             | 6             | C                           | 3.377078   | -3.192152 | -3.214987 |
| 3             | 8             | O                           | 5.374497   | -2.77376  | -4.752419 |
| 4             | 6             | C                           | 6.367615   | -0.211504 | -4.376794 |
| 5             | 6             | C                           | 8.250738   | -0.250927 | -2.171666 |
| 6             | 6             | C                           | 7.171586   | -1.711566 | 0.088533  |
| 7             | 6             | C                           | 4.009007   | 1.208176  | -3.46185  |
| 8             | 6             | C                           | 10.874808  | -1.441474 | -2.436032 |
| 9             | 6             | C                           | 11.693746  | -1.927016 | 0.347943  |
| 10            | 6             | C                           | 9.30432    | -1.512312 | 2.036719  |
| 11            | 6             | C                           | 0.049626   | -0.374747 | -1.175818 |
| 12            | 6             | C                           | -1.318798  | -2.236229 | 0.542041  |
| 13            | 8             | O                           | -1.043148  | 1.39185   | -2.143931 |
| 14            | 6             | C                           | 7.460801   | 0.684841  | -6.861984 |
| 15            | 8             | O                           | 2.288633   | -5.178585 | -3.108362 |
| 16            | 1             | H                           | 7.119037   | -3.721922 | -0.463843 |
| 17            | 6             | C                           | 9.08305    | -3.380577 | 4.218629  |
| 18            | 8             | O                           | 9.217922   | 1.017443  | 2.978575  |
| 19            | 1             | H                           | 8.498543   | 1.728526  | -1.575489 |
| 20            | 6             | C                           | -1.630125  | -1.091341 | 3.237162  |
| 21            | 6             | C                           | -3.847836  | -2.984246 | -0.651061 |
| 22            | 6             | C                           | -3.414211  | 1.097716  | 3.394835  |
| 23            | 6             | C                           | -2.960097  | 3.606963  | 3.155991  |
| 24            | 6             | C                           | -5.325134  | 5.173741  | 3.48215   |
| 25            | 6             | C                           | -7.496634  | 3.254969  | 3.535518  |
| 26            | 6             | C                           | -6.12106   | 0.683362  | 3.885949  |
| 27            | 6             | C                           | -0.499784  | 4.869699  | 2.631619  |
| 28            | 8             | O                           | -7.16541   | -1.283685 | 4.418091  |
| 29            | 6             | C                           | -8.835492  | 3.048226  | 0.938111  |
| 30            | 8             | O                           | -9.258625  | 3.544805  | 5.516458  |
| 31            | 6             | C                           | -11.254624 | 1.482535  | 0.880289  |
| 32            | 8             | O                           | -7.966834  | 4.052251  | -0.924312 |
| 33            | 6             | C                           | -13.537851 | 3.28162   | 0.863872  |
| 34            | 6             | C                           | -11.244803 | -0.253661 | -1.434977 |
| 35            | 1             | H                           | 3.660126   | -2.296407 | 2.112194  |
| 36            | 1             | H                           | 4.505023   | 0.936308  | 1.712941  |
| 37            | 1             | H                           | 2.698031   | 1.5927    | -5.025697 |
| 38            | 1             | H                           | 4.458337   | 3.005994  | -2.528971 |
| 39            | 1             | H                           | 10.724559  | -3.238926 | -3.474804 |

|    |   |   |            |           |           |
|----|---|---|------------|-----------|-----------|
| 40 | 1 | H | 12.218282  | -0.234437 | -3.462465 |
| 41 | 1 | H | 13.183377  | -0.60774  | 0.953346  |
| 42 | 1 | H | 12.445592  | -3.850085 | 0.589084  |
| 43 | 1 | H | -0.135039  | -3.932512 | 0.728098  |
| 44 | 1 | H | 9.021115   | -0.543814 | -7.473592 |
| 45 | 1 | H | 6.000976   | 0.684593  | -8.34148  |
| 46 | 1 | H | 8.193416   | 2.620404  | -6.650012 |
| 47 | 1 | H | 10.724515  | -3.22737  | 5.495343  |
| 48 | 1 | H | 7.368802   | -2.99091  | 5.330071  |
| 49 | 1 | H | 8.996927   | -5.341887 | 3.531238  |
| 50 | 1 | H | 10.589423  | 1.230729  | 4.163843  |
| 51 | 1 | H | -2.381237  | -2.602934 | 4.454815  |
| 52 | 1 | H | 0.23105    | -0.561024 | 3.996263  |
| 53 | 1 | H | -4.95415   | -1.290521 | -1.122499 |
| 54 | 1 | H | -4.955946  | -4.160825 | 0.65263   |
| 55 | 1 | H | -3.518335  | -4.048909 | -2.405773 |
| 56 | 1 | H | -5.262383  | 6.203131  | 5.29419   |
| 57 | 1 | H | -5.520517  | 6.553538  | 1.938273  |
| 58 | 1 | H | 1.112754   | 3.572614  | 2.783714  |
| 59 | 1 | H | -0.519017  | 5.632729  | 0.692448  |
| 60 | 1 | H | -0.199544  | 6.471792  | 3.930041  |
| 61 | 1 | H | -10.114169 | 5.141009  | 5.287508  |
| 62 | 1 | H | -11.309257 | 0.345523  | 2.617312  |
| 63 | 1 | H | -13.471058 | 4.539358  | -0.793571 |
| 64 | 1 | H | -15.310359 | 2.194431  | 0.787943  |
| 65 | 1 | H | -13.598158 | 4.459192  | 2.578663  |
| 66 | 1 | H | -13.016499 | -1.340187 | -1.534096 |
| 67 | 1 | H | -9.664545  | -1.602302 | -1.344742 |
| 68 | 1 | H | -11.043176 | 0.858093  | -3.180343 |
